# Supplementary material for: Chiral bifunctional sulfide-catalyzed enantioselective bromolactonizations of α- and β-substituted 5-hexenoic acids
Source: publisher site journal article supplement (doi:10.3762/bjoc.20.158), 2024-07-30

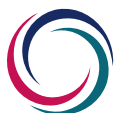

## Supporting Information

for

### Chiral bifunctional sulfide-catalyzed enantioselective bromolactonizations of $\alpha$ - and $\beta$ -substituted 5-hexenoic acids

Sao Sumida, Ken Okuno, Taiki Mori, Yasuaki Furuya and Seiji Shirakawa

*Beilstein J. Org. Chem.* **2024**, *20*, 1794–1799. [doi:10.3762/bjoc.20.158](https://doi.org/10.3762/bjoc.20.158)

**Experimental procedures, characterization data, copies of NMR spectra, and copies of HPLC charts**

## Table of Contents

|                                                                          |      |
|--------------------------------------------------------------------------|------|
| <b>General information</b>                                               | S-2  |
| <b>Experimental section</b>                                              | S-3  |
| <b>Synthesis of catalysts.</b>                                           | S-3  |
| <b>Preparation of substrates.</b>                                        | S-3  |
| <b>General procedure for asymmetric bromolactonizations (Scheme 4).</b>  | S-4  |
| <b>Asymmetric bromolactonization of 2a on a larger scale (Scheme 5).</b> | S-10 |
| <b>Transformations of 3a (Scheme 5).</b>                                 | S-10 |
| <b>Determination of the absolute configuration of products.</b>          | S-12 |
| <b>References</b>                                                        | S-13 |
| <b>NMR Charts</b>                                                        | S-14 |
| <b>HPLC Charts</b>                                                       | S-40 |

## General information

$^1\text{H}$  and  $^{13}\text{C}$  NMR spectra were measured on a JEOL JNM-ECZ 400R NMR instrument (400 MHz for  $^1\text{H}$  NMR, 100 MHz for  $^{13}\text{C}$  NMR). Tetramethylsilane (TMS) served as the internal standard (0 ppm) for  $^1\text{H}$  NMR, and  $\text{CDCl}_3$  served as the internal standard (77.0 ppm) for  $^{13}\text{C}$  NMR. The following abbreviations were used to express the multiplicities: s = singlet; d = doublet; t = triplet; q = quartet; m = multiplet. High-resolution mass spectra (HRMS) were measured on a JEOL JMS-700N. Infrared spectra (IR) were measured on a JASCO FT/IR-4200 spectrometer. Optical rotations were measured on a JASCO P-2100 polarimeter. High-performance liquid chromatography (HPLC) was performed on Shimadzu LC-20AT and SPD-20A instruments using Daicel Chiralpak AS-3, IB-3, IC-3, IE-3, IG-3 columns (4.6 mm  $\times$  250 mm). All reactions were monitored by thin-layer chromatography using Merck precoated TLC plates (silica gel 60GF-254, 0.25 mm), with visualization by the use of UV lamp (254 nm) or dyes. The products were purified by flash column chromatography on silica gel.

## Experimental section

### Synthesis of catalysts.

BINOL-derived chiral sulfide catalysts (*S*)-**1a**,<sup>S1</sup> (*S*)-**1b**,<sup>S2</sup> (*S*)-**1c**,<sup>S3</sup> (*S*)-**1d**,<sup>S4</sup> (*S*)-**1e**,<sup>S2</sup> (*S*)-**1f**,<sup>S2</sup> (*S*)-**1g**,<sup>S4</sup> (*S*)-**4**,<sup>S1</sup> (*S*)-**5**,<sup>S5</sup> and (*S*)-**6**<sup>S1</sup> were prepared according to the literature method.

### Preparation of substrates.

Substrates **2a**, **2e**, **2f**, **2g**, **2h**, **2i**, **2j**, and **2o** are known and commercially available compounds. Substrates **2b**,<sup>S6</sup> **2c**,<sup>S6</sup> **2d**,<sup>S6</sup> **2k**,<sup>S7</sup> **2l**,<sup>S7</sup> **2m**<sup>S7</sup> and **2n**<sup>S7</sup> were prepared according to the literature procedures.

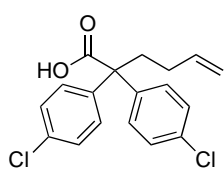

**2b**: <sup>1</sup>H NMR (400 MHz, CDCl<sub>3</sub>) δ 7.29 (d, *J* = 8.8 Hz, 4H), 7.22 (d, *J* = 8.8 Hz, 4H), 5.79–5.69 (m, 1H), 4.99–4.93 (m, 2H), 2.42–2.28 (m, 2H), 1.82–1.76 (m, 2H); <sup>13</sup>C NMR (100 MHz, CDCl<sub>3</sub>) δ 179.9, 140.3, 137.5, 133.3, 130.3, 128.3, 115.1, 59.2, 36.9, 29.4; IR (neat): 3076, 2977, 2958, 2936, 1698, 1492, 1095, 1013, 905, 820, 729 cm<sup>-1</sup>; HRMS (EI) calcd for C<sub>18</sub>H<sub>16</sub>Cl<sub>2</sub>O<sub>2</sub>: 334.0527 ([M]<sup>+</sup>), found 334.0527.

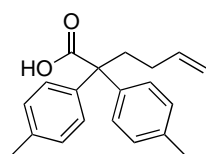

**2c**: <sup>1</sup>H NMR (400 MHz, CDCl<sub>3</sub>) δ 7.18 (dt, *J* = 8.4, 2.0 Hz, 4H), 7.10 (d, *J* = 8.0 Hz, 4H), 5.80–5.70 (m, 1H), 4.98–4.88 (m, 2H), 2.42–2.38 (m, 2H), 2.33 (s, 6H), 1.83–1.77 (m, 2H); <sup>13</sup>C NMR (100 MHz, CDCl<sub>3</sub>) δ 181.2, 139.3, 138.3, 136.5, 128.8, 128.6, 114.5, 59.4, 37.0, 29.6, 20.9; IR (neat): 3064, 2923, 2871, 1696, 1510, 1260, 907, 811, 732 cm<sup>-1</sup>; HRMS (EI) calcd for C<sub>20</sub>H<sub>22</sub>O<sub>2</sub>: 294.1620 ([M]<sup>+</sup>), found 294.1620.

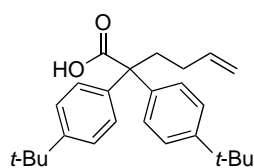

**2d**: <sup>1</sup>H NMR (400 MHz, CDCl<sub>3</sub>) δ 7.31 (dt, *J* = 8.8, 2.0 Hz, 4H), 7.22 (dt, *J* = 8.4, 2.0 Hz, 4H), 5.82–5.72 (m, 1H), 5.00–4.89 (m, 2H), 2.44–2.40 (m, 2H), 1.85–1.80 (m, 2H), 1.31 (s, 18H); <sup>13</sup>C NMR (100 MHz, CDCl<sub>3</sub>) δ 181.0, 149.6, 139.0, 138.4, 128.6, 124.8, 114.4, 59.3, 37.0, 34.4, 31.3, 29.5; IR (neat): 3076, 2962, 2904, 2869, 1697, 1269, 908,

826, 733  $\text{cm}^{-1}$ ; HRMS (FAB) calcd for  $\text{C}_{26}\text{H}_{35}\text{O}_2$ : 379.2637 ( $[\text{M}+\text{H}]^+$ ), found 379.2638.

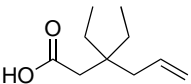 **2k**:  $^1\text{H}$  NMR (400 MHz,  $\text{CDCl}_3$ )  $\delta$  5.86–5.75 (m, 1H), 5.11–5.06 (m, 2H), 2.24 (s, 2H), 2.12 (d,  $J = 7.5$  Hz, 2H), 1.39 (q,  $J = 7.5$  Hz, 4H), 0.84 (t,  $J = 7.4$  Hz, 6H);  $^{13}\text{C}$  NMR (100 MHz,  $\text{CDCl}_3$ )  $\delta$  179.2, 134.3, 117.8, 40.1, 39.9, 38.9, 28.2, 7.5; IR (neat): 3075, 2968, 2926, 2883, 1703, 1458, 1408, 1297, 1217, 914  $\text{cm}^{-1}$ ; HRMS (EI) calcd for  $\text{C}_{10}\text{H}_{18}\text{O}_2$ : 170.1307 ( $[\text{M}]^+$ ), found 170.1307.

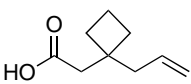 **2l**:  $^1\text{H}$  NMR (400 MHz,  $\text{CDCl}_3$ )  $\delta$  5.85–5.75 (m, 1H), 5.12–5.07 (m, 2H), 2.47 (s, 2H), 2.34 (dt,  $J = 7.2, 1.2$  Hz, 2H), 1.99–1.86 (m, 6H);  $^{13}\text{C}$  NMR (100 MHz,  $\text{CDCl}_3$ )  $\delta$  179.0, 134.5, 117.7, 42.91, 42.89, 39.7, 31.1, 15.2; IR (neat): 3077, 2978, 2933, 2859, 1702, 1408, 1274, 915  $\text{cm}^{-1}$ ; HRMS (EI) calcd for  $\text{C}_9\text{H}_{14}\text{O}_2$ : 154.0994 ( $[\text{M}]^+$ ), found 154.0994.

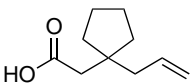 **2m**:  $^1\text{H}$  NMR (400 MHz,  $\text{CDCl}_3$ )  $\delta$  5.88–5.78 (m, 1H), 5.10–5.05 (m, 2H), 2.35 (s, 2H), 2.22 (d,  $J = 7.5$  Hz, 2H), 1.66–1.53 (m, 8H);  $^{13}\text{C}$  NMR (100 MHz,  $\text{CDCl}_3$ )  $\delta$  179.4, 135.2, 117.7, 44.3, 42.8, 42.5, 37.1, 24.2; IR (neat): 3076, 2952, 2869, 1702, 1442, 1407, 1291, 1224, 995, 914  $\text{cm}^{-1}$ ; HRMS (EI) calcd for  $\text{C}_{10}\text{H}_{16}\text{O}_2$ : 168.1150 ( $[\text{M}]^+$ ), found 168.1150.

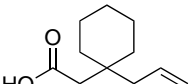 **2n**:  $^1\text{H}$  NMR (400 MHz,  $\text{CDCl}_3$ )  $\delta$  5.89–5.79 (m, 1H), 5.11–5.05 (m, 2H), 2.31 (s, 2H), 2.22 (d,  $J = 7.5$  Hz, 2H), 1.56–1.35 (m, 10H);  $^{13}\text{C}$  NMR (100 MHz,  $\text{CDCl}_3$ )  $\delta$  179.3, 134.2, 118.0, 41.7, 41.6, 36.1, 35.4, 26.0, 21.5; IR (neat): 3074, 2925, 2853, 1700, 1455, 1407, 1294, 1210, 913  $\text{cm}^{-1}$ ; HRMS (EI) calcd for  $\text{C}_{11}\text{H}_{18}\text{O}_2$ : 182.1307 ( $[\text{M}]^+$ ), found 182.1307.

#### General procedure for asymmetric bromolactonizations (Scheme 4).

In a manner similar to our previous report,<sup>S8</sup> a solution of substrate **2** (0.10 mmol) and catalyst (*S*)-**1g** (6.0 mg, 0.010 mmol, 10 mol %) in  $\text{CH}_2\text{Cl}_2$  (1.5 mL)-toluene (0.5 mL) was cooled to  $-78$  °C. After stirring for 10 min at  $-78$  °C, *N*-bromophthalimide (NBP) (27.1 mg, 0.12 mmol, 1.2 equiv) was added to the cooled reaction solution. The

reaction mixture was stirred for 24 h at  $-78\text{ }^{\circ}\text{C}$ . After 24 h, the reaction mixture was quenched with saturated aqueous  $\text{Na}_2\text{SO}_3$  (3 mL) at  $-78\text{ }^{\circ}\text{C}$  and stirred for 10 min at  $-78\text{ }^{\circ}\text{C}$ . The quenched reaction mixture was diluted with  $\text{CH}_2\text{Cl}_2$  (2 mL) and  $\text{H}_2\text{O}$  (2 mL), and the solution was warmed to room temperature. The organic materials were extracted with  $\text{CH}_2\text{Cl}_2$  for three times ( $5\text{ mL} \times 3$ ). The combined extracts were dried over  $\text{Na}_2\text{SO}_4$  and concentrated. The residue was purified by flash column chromatography on silica gel to give product **3**. The enantioselectivities of the isolated products **3** were determined by HPLC analysis on a chiral stationary phase.

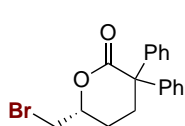

**3a**:  $[\alpha]_{\text{D}}^{26} -23.4$  ( $c = 1.0$ ,  $\text{CHCl}_3$ , 89:11 er); HPLC analysis: Daicel Chiralpak IE-3, hexane/2-propanol = 2:1, flow rate = 0.5 mL/min, 254 nm; retention time: 22.2 min (major) and 25.6 min (minor).  $^1\text{H}$  NMR (400 MHz,  $\text{CDCl}_3$ )  $\delta$  7.38–7.24 (m, 8H), 7.18–7.15 (m, 2H), 4.54–4.47 (m, 1H), 3.49 (dd,  $J = 10.7, 4.3$  Hz, 1H), 3.43 (dd,  $J = 10.6, 6.3$  Hz, 1H), 2.81–2.74 (m, 1H), 2.69–2.63 (m, 1H), 2.11–2.03 (m, 1H), 1.94–1.85 (m, 1H);  $^{13}\text{C}$  NMR (100 MHz,  $\text{CDCl}_3$ )  $\delta$  172.4, 142.1, 141.1, 128.6, 128.4, 128.11, 128.09, 127.6, 127.3, 77.9, 56.8, 34.0, 31.6, 24.1; IR (neat): 3060, 3026, 2963, 2932, 1736, 1496, 1446, 1263, 1164, 1144, 1121, 1109, 1063, 751, 698  $\text{cm}^{-1}$ ; HRMS (EI) calcd for  $\text{C}_{18}\text{H}_{17}\text{BrO}_2$ : 344.0412 ( $[\text{M}]^+$ ), found 344.0411.

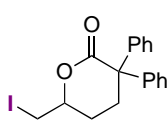

**Iodolactonization Product**: HPLC analysis: Daicel Chiralpak IE-3, hexane/2-propanol = 2:1, flow rate = 0.5 mL/min, 254 nm; retention time: 23.6 min and 27.7 min.  $^1\text{H}$  NMR (400 MHz,  $\text{CDCl}_3$ )  $\delta$  7.38–7.22 (m, 8H), 7.19–7.15 (m, 2H), 4.32–4.26 (m, 1H), 3.32 (ddd,  $J = 10.4, 4.2, 1.6$  Hz, 1H), 3.24 (dd,  $J = 10.4, 6.7$  Hz, 1H), 2.80–2.73 (m, 1H), 2.67–2.61 (m, 1H), 2.17–2.08 (m, 1H), 1.84–1.74 (m, 1H);  $^{13}\text{C}$  NMR (100 MHz,  $\text{CDCl}_3$ )  $\delta$  172.4, 142.0, 141.2, 128.5, 128.4, 128.14, 128.08, 127.5, 127.3, 78.1, 56.6, 31.8, 25.9, 7.7; IR (neat): 3059, 3031, 2958, 2937, 1733, 1496, 1446, 1258, 1156, 1137, 1121, 1108, 1052, 751, 698  $\text{cm}^{-1}$ ; HRMS (FAB) calcd for  $\text{C}_{18}\text{H}_{18}\text{IO}_2$ : 393.0351 ( $[\text{M}+\text{H}]^+$ ), found 393.0351.

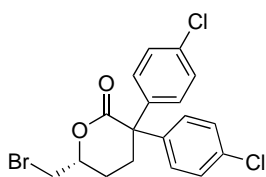

**3b**:  $[\alpha]_{\text{D}}^{25} -10.4$  ( $c = 1.0$ ,  $\text{CHCl}_3$ , 86:14 er); HPLC analysis: Daicel Chiralpak IC-3, hexane/2-propanol = 2:1, flow rate = 0.5 mL/min, 254 nm; retention time: 19.9 min (minor) and 22.8 min (major).  $^1\text{H}$  NMR (400 MHz,  $\text{CDCl}_3$ )  $\delta$  7.35–7.29 (m, 4H), 7.16 (dt,  $J = 8.9$ ,

2.2 Hz, 2H), 7.10 (dt,  $J = 8.9, 2.2$  Hz, 2H), 4.57–4.51 (m, 1H), 3.49 (dd,  $J = 10.8, 4.4$  Hz, 1H), 3.46 (dd,  $J = 10.8, 5.8$  Hz, 1H), 2.76–2.69 (m, 1H), 2.63–2.57 (m, 1H), 2.09–2.02 (m, 1H), 1.93–1.84 (m, 1H);  $^{13}\text{C}$  NMR (100 MHz,  $\text{CDCl}_3$ )  $\delta$  171.6, 140.3, 139.6, 133.8, 133.6, 129.49, 129.48, 128.8, 128.7, 78.3, 55.9, 33.9, 31.7, 24.0; IR (neat): 2963, 1732, 1492, 1248, 1164, 1145, 1128, 1095, 1012, 820, 734  $\text{cm}^{-1}$ ; HRMS (FAB) calcd for  $\text{C}_{18}\text{H}_{16}\text{BrCl}_2\text{O}_2$ : 412.9711 ( $[\text{M}+\text{H}]^+$ ), found 412.9711.

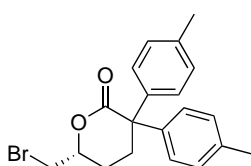

**3c:**  $[\alpha]_{\text{D}}^{26} -20.7$  ( $c = 1.0$ ,  $\text{CHCl}_3$ , 89:11 er); HPLC analysis: Daicel Chiralpak IE-3, hexane/2-propanol = 2:1, flow rate = 0.5 mL/min, 254 nm; retention time: 28.8 min (major) and 33.9 min (minor).  $^1\text{H}$  NMR (400 MHz,  $\text{CDCl}_3$ )  $\delta$  7.17–7.11 (m, 6H), 7.03 (dt,  $J = 8.4, 2.0$  Hz, 2H), 4.51–4.45 (m, 1H), 3.47 (dd,  $J = 10.7, 4.3$  Hz, 1H), 3.41 (dd,  $J = 10.7, 6.2$  Hz, 1H), 2.77–2.70 (m, 1H), 2.64–2.58 (m, 1H), 2.34 (s, 3H), 2.33 (s, 3H), 2.08–2.01 (m, 1H), 1.93–1.83 (m, 1H);  $^{13}\text{C}$  NMR (100 MHz,  $\text{CDCl}_3$ )  $\delta$  172.8, 139.3, 138.1, 137.3, 136.9, 129.3, 129.0, 127.93, 127.87, 77.7, 56.1, 34.1, 31.5, 24.2, 21.0, 20.9; IR (neat): 3024, 2961, 2922, 1733, 1512, 1249, 1160, 1143, 1134, 1104, 1062, 810, 731  $\text{cm}^{-1}$ ; HRMS (EI) calcd for  $\text{C}_{20}\text{H}_{21}\text{BrO}_2$ : 372.0725 ( $[\text{M}]^+$ ), found 372.0719.

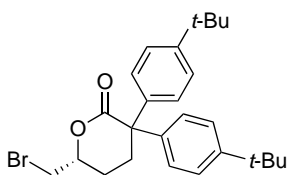

**3d:**  $[\alpha]_{\text{D}}^{19} -13.2$  ( $c = 1.0$ ,  $\text{CHCl}_3$ , 80:20 er); HPLC analysis: Daicel Chiralpak IE-3, hexane/2-propanol = 5:1, flow rate = 0.5 mL/min, 254 nm; retention time: 24.3 min (major) and 29.5 min (minor).  $^1\text{H}$  NMR (400 MHz,  $\text{CDCl}_3$ )  $\delta$  7.35 (dt,  $J = 8.4, 2.2$  Hz, 2H), 7.32 (dt,  $J = 8.4, 2.2$  Hz, 2H), 7.16 (dt,  $J = 8.4, 2.2$  Hz, 2H), 7.06 (dt,  $J = 8.8, 2.2$  Hz, 2H), 4.51–4.45 (m, 1H), 3.49 (dd,  $J = 10.7, 4.3$  Hz, 1H), 3.42 (dd,  $J = 10.5, 6.4$  Hz, 1H), 2.76–2.69 (m, 1H), 2.65–2.58 (m, 1H), 2.11–2.04 (m, 1H), 1.93–1.84 (m, 1H), 1.31 (s, 9H), 1.30 (s, 9H);  $^{13}\text{C}$  NMR (100 MHz,  $\text{CDCl}_3$ )  $\delta$  172.9, 150.3, 149.9, 139.2, 138.0, 127.7, 127.6, 125.5, 125.2, 77.8, 56.1, 34.43, 34.38, 34.0, 31.8, 31.3, 24.2; IR (neat): 2962, 2903, 2868, 1734, 1509, 1463, 1363, 1268, 1164, 1138, 1108, 911, 827, 735  $\text{cm}^{-1}$ ; HRMS (FAB) calcd for  $\text{C}_{26}\text{H}_{34}\text{BrO}_2$ : 457.1742 ( $[\text{M}+\text{H}]^+$ ), found 457.1742.

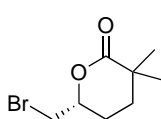

**3e:**  $[\alpha]_{\text{D}}^{26} +5.2$  ( $c = 1.1$ ,  $\text{CHCl}_3$ , 69:31 er); HPLC analysis: Daicel Chiralpak IC-3, hexane/2-propanol = 3:1, flow rate = 0.5 mL/min, 214 nm; retention time: 19.6 min (major) and 23.4 min (minor).  $^1\text{H}$  NMR (400 MHz,

CDCl<sub>3</sub>) δ 4.54–4.48 (m, 1H), 3.53 (dd, *J* = 10.8, 4.4 Hz, 1H), 3.50 (dd, *J* = 10.6, 5.8 Hz, 1H), 2.05–1.89 (m, 2H), 1.86–1.71 (m, 2H), 1.32 (s, 3H), 1.31 (s, 3H); <sup>13</sup>C NMR (100 MHz, CDCl<sub>3</sub>) δ 176.3, 79.1, 37.9, 34.3, 33.7, 27.6, 27.4, 24.2; IR (neat): 2966, 2871, 1729, 1387, 1287, 1146, 1121, 1016, 749 cm<sup>-1</sup>; HRMS (EI) calcd for C<sub>8</sub>H<sub>13</sub>BrO<sub>2</sub>: 220.0099 ([M]<sup>+</sup>), found 220.0097.

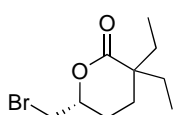

**3f:** [ $\alpha$ ]<sup>23</sup><sub>D</sub> +4.1 (*c* = 0.91, CHCl<sub>3</sub>, 79:21 er); HPLC analysis: Daicel Chiralpak IC-3, hexane/2-propanol = 10:1, flow rate = 0.5 mL/min, 214 nm; retention time: 24.4 min (major) and 28.2 min (minor). <sup>1</sup>H NMR (400 MHz, CDCl<sub>3</sub>) δ 4.49–4.40 (m, 1H), 3.52 (dd, *J* = 10.9, 4.0 Hz, 1H), 3.46 (dd, *J* = 10.6, 6.3 Hz, 1H), 2.10–1.99 (m, 1H), 1.89–1.72 (m, 5H), 1.68–1.58 (m, 1H), 1.53–1.46 (m, 1H), 0.92 (t, *J* = 7.4 Hz, 3H), 0.91 (t, *J* = 7.4 Hz, 3H); <sup>13</sup>C NMR (100 MHz, CDCl<sub>3</sub>) δ 175.2, 78.7, 45.7, 34.1, 31.8, 31.0, 27.3, 24.8, 8.7, 8.6; IR (neat): 2964, 2925, 1723, 1461, 1249, 1139, 1116, 1034, 948 cm<sup>-1</sup>; HRMS (FAB) calcd for C<sub>10</sub>H<sub>18</sub>BrO<sub>2</sub>: 249.0490 ([M+H]<sup>+</sup>), found 249.0490.

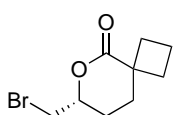

**3g:** [ $\alpha$ ]<sup>25</sup><sub>D</sub> +5.6 (*c* = 1.1, CHCl<sub>3</sub>, 72:28 er); HPLC analysis: Daicel Chiralpak IC-3, hexane/2-propanol = 10:1, flow rate = 0.5 mL/min, 254 nm; retention time: 40.4 min (major) and 50.4 min (minor). <sup>1</sup>H NMR (400 MHz, CDCl<sub>3</sub>) δ 4.47–4.41 (m, 1H), 3.50 (dd, *J* = 10.7, 4.3 Hz, 1H), 3.44 (dd, *J* = 10.7, 6.2 Hz, 1H), 2.73–2.65 (m, 1H), 2.59–2.51 (m, 1H), 2.16–1.70 (m, 8H); <sup>13</sup>C NMR (100 MHz, CDCl<sub>3</sub>) δ 175.3, 78.0, 42.6, 34.0, 32.3, 31.0, 30.5, 24.4, 15.5; IR (neat): 2928, 2855, 1732, 1306, 1151, 1113, 1090, 1012 cm<sup>-1</sup>; HRMS (EI) calcd for C<sub>9</sub>H<sub>13</sub>BrO<sub>2</sub>: 232.0099 ([M]<sup>+</sup>), found 232.0099.

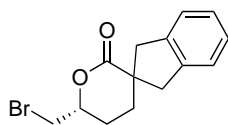

**3h:** [ $\alpha$ ]<sup>25</sup><sub>D</sub> +28.4 (*c* = 1.3, CHCl<sub>3</sub>, 80:20 er); HPLC analysis: Daicel Chiralpak IE-3, hexane/2-propanol = 2:1, flow rate = 0.5 mL/min, 254 nm; retention time: 22.2 min (major) and 23.7 min (minor). <sup>1</sup>H NMR (400 MHz, CDCl<sub>3</sub>) δ 7.22–7.16 (m, 4H), 4.65–4.59 (m, 1H), 3.79 (d, *J* = 15.8 Hz, 1H), 3.60–3.53 (m, 2H), 3.48 (d, *J* = 15.8 Hz, 1H), 3.05 (d, *J* = 15.8 Hz, 1H), 2.89 (d, *J* = 15.8 Hz, 1H), 2.13–1.86 (m, 4H); <sup>13</sup>C NMR (100 MHz, CDCl<sub>3</sub>) δ 175.6, 140.7, 139.5, 127.0, 126.8, 124.6, 124.5, 78.7, 48.7, 45.6, 45.2, 34.3, 31.6, 24.6; IR (neat): 2937, 1731, 1302, 1228, 1150, 1101, 1071, 989, 913, 747 cm<sup>-1</sup>; HRMS (EI) calcd for C<sub>14</sub>H<sub>15</sub>BrO<sub>2</sub>:



294.0255 ( $[M]^+$ ), found 294.0255.

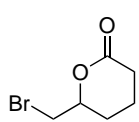

**3i:**<sup>S9</sup> HPLC analysis: Daicel Chiralpak IE-3, hexane/2-propanol = 5:1, flow rate = 0.5 mL/min, 214 nm; retention time: 34.0 min (major) and 37.1 min (minor). <sup>1</sup>H NMR (400 MHz, CDCl<sub>3</sub>)  $\delta$  4.54–4.48 (m, 1H), 3.54 (ddd,  $J$  = 10.7, 4.5, 0.8 Hz, 1H), 3.48 (dd,  $J$  = 10.7, 6.2 Hz, 1H), 2.67–2.59 (m, 1H), 2.53–2.44 (m, 1H), 2.18–2.10 (m, 1H), 2.04–1.83 (m, 2H), 1.77–1.67 (m, 1H); <sup>13</sup>C NMR (100 MHz, CDCl<sub>3</sub>)  $\delta$  170.4, 78.6, 33.7, 29.4, 26.3, 18.1; IR (neat): 1736, 1234, 1041 cm<sup>-1</sup>; HRMS (EI) calcd for C<sub>6</sub>H<sub>9</sub>BrO<sub>2</sub>: 191.9786 ( $[M]^+$ ), found 191.9788.

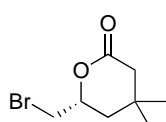

**3j:**<sup>S10</sup>  $[\alpha]_D^{21} +3.0$  ( $c$  = 1.2, CHCl<sub>3</sub>, 84:16 er); HPLC analysis: Daicel Chiralpak IE-3, hexane/2-propanol = 5:1, flow rate = 0.5 mL/min, 214 nm; retention time: 25.0 min (major) and 27.2 min (minor). <sup>1</sup>H NMR (400 MHz, CDCl<sub>3</sub>)  $\delta$  4.62–4.55 (m, 1H), 3.54 (dd,  $J$  = 10.8, 4.8 Hz, 1H), 3.51 (dd,  $J$  = 10.8, 5.6 Hz, 1H), 2.40 (dd,  $J$  = 16.8, 2.2 Hz, 1H), 2.26 (d,  $J$  = 16.9 Hz, 1H), 1.87 (ddd,  $J$  = 14.0, 4.0, 2.0 Hz, 1H), 1.62 (dd,  $J$  = 14.0, 11.9 Hz, 1H), 1.12 (s, 3H), 1.11 (s, 3H); <sup>13</sup>C NMR (100 MHz, CDCl<sub>3</sub>)  $\delta$  170.5, 75.8, 43.6, 40.1, 34.4, 30.7, 29.8, 26.9; IR (neat): 2960, 1739, 1371, 1238, 1198, 1054, 1044 cm<sup>-1</sup>; HRMS (EI) calcd for C<sub>8</sub>H<sub>13</sub>BrO<sub>2</sub>: 220.0099 ( $[M]^+$ ), found 220.0099.

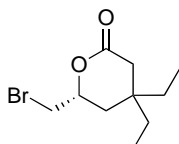

**3k:**  $[\alpha]_D^{19} -11.2$  ( $c$  = 1.1, CHCl<sub>3</sub>, 89:11 er); HPLC analysis: Daicel Chiralpak IG-3, hexane/2-propanol = 5:1, flow rate = 0.5 mL/min, 214 nm; retention time: 22.1 min (major) and 24.1 min (minor). <sup>1</sup>H NMR (400 MHz, CDCl<sub>3</sub>)  $\delta$  4.51–4.45 (m, 1H), 3.53 (dd,  $J$  = 10.6, 4.7 Hz, 1H), 3.47 (dd,  $J$  = 10.6, 6.1 Hz, 1H), 2.37 (dd,  $J$  = 16.5, 1.4 Hz, 1H), 2.26 (d,  $J$  = 16.2 Hz, 1H), 1.94 (ddd,  $J$  = 14.2, 3.3, 1.3 Hz, 1H), 1.53–1.35 (m, 5H), 0.87 (t,  $J$  = 7.2 Hz, 3H), 0.85 (t,  $J$  = 7.6 Hz, 3H); <sup>13</sup>C NMR (100 MHz, CDCl<sub>3</sub>)  $\delta$  171.4, 75.4, 40.2, 36.4, 35.3, 33.9, 31.7, 29.2, 7.6, 7.3; IR (neat): 2965, 2927, 1748, 1457, 1248, 1218, 1053 cm<sup>-1</sup>; HRMS (EI) calcd for C<sub>10</sub>H<sub>17</sub>BrO<sub>2</sub>: 248.0412 ( $[M]^+$ ), found 248.0415.

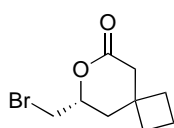

**3l:**  $[\alpha]_D^{20} +9.7$  ( $c$  = 1.4, CHCl<sub>3</sub>, 81:19 er); HPLC analysis: Daicel Chiralpak IE-3, hexane/2-propanol = 5:1, flow rate = 0.5 mL/min, 214 nm; retention time: 30.2 min (major) and 31.8 min (minor). <sup>1</sup>H NMR (400

MHz, CDCl<sub>3</sub>)  $\delta$  4.53–4.46 (m, 1H), 3.54 (dd,  $J = 10.8, 4.4$  Hz, 1H), 3.51 (dd,  $J = 10.8, 6.0$  Hz, 1H), 2.80 (dd,  $J = 17.5, 2.2$  Hz, 1H), 2.43 (d,  $J = 17.6$  Hz, 1H), 2.18 (ddd,  $J = 13.7, 3.5, 2.2$  Hz, 1H), 2.02–1.87 (m, 6H), 1.75 (dd,  $J = 13.7, 11.4$  Hz, 1H); <sup>13</sup>C NMR (100 MHz, CDCl<sub>3</sub>)  $\delta$  170.1, 75.5, 42.3, 38.4, 36.4, 34.2, 33.1, 31.9, 14.9; IR (neat): 2950, 1739, 1236, 1195, 1123, 1036, 913, 741 cm<sup>-1</sup>; HRMS (EI) calcd for C<sub>9</sub>H<sub>14</sub>BrO<sub>2</sub>: 233.0177 ([M+H]<sup>+</sup>), found 233.0175.

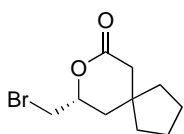

**3m**: [ $\alpha$ ]<sup>21</sup><sub>D</sub> +5.1 ( $c = 1.2$ , CHCl<sub>3</sub>, 82:18 er); HPLC analysis: Daicel Chiralpak IG-3, hexane/2-propanol = 5:1, flow rate = 0.5 mL/min, 214 nm; retention time: 25.5 min (major) and 27.7 min (minor). <sup>1</sup>H NMR (400

MHz, CDCl<sub>3</sub>)  $\delta$  4.59–4.53 (m, 1H), 3.54 (dd,  $J = 10.8, 4.8$  Hz, 1H), 3.51 (dd,  $J = 10.8, 5.6$  Hz, 1H), 2.52 (dd,  $J = 17.2, 2.1$  Hz, 1H), 2.31 (d,  $J = 17.2$  Hz, 1H), 1.91 (ddd,  $J = 13.6, 3.6, 2.2$  Hz, 1H), 1.79–1.63 (m, 5H), 1.61–1.48 (m, 4H); <sup>13</sup>C NMR (100 MHz, CDCl<sub>3</sub>)  $\delta$  170.4, 76.5, 41.9, 40.54, 40.52, 38.6, 36.9, 34.5, 24.1, 23.5; IR (neat): 2952, 2864, 1733, 1245, 1099, 1056, 1041 cm<sup>-1</sup>; HRMS (EI) calcd for C<sub>10</sub>H<sub>15</sub>BrO<sub>2</sub>: 246.0255 ([M]<sup>+</sup>), found 246.0255.

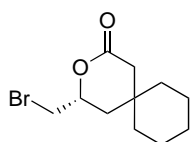

**3n**: [ $\alpha$ ]<sup>19</sup><sub>D</sub> -9.8 ( $c = 0.95$ , CHCl<sub>3</sub>, 85:15 er); HPLC analysis: Daicel Chiralpak IG-3, hexane/2-propanol = 5:1, flow rate = 0.5 mL/min, 214 nm; retention time: 26.9 min (major) and 29.8 min (minor). <sup>1</sup>H NMR (400

MHz, CDCl<sub>3</sub>)  $\delta$  4.56–4.50 (m, 1H), 3.53 (dd,  $J = 10.8, 4.8$  Hz, 1H), 3.49 (dd,  $J = 10.8, 6.0$  Hz, 1H), 2.49 (dd,  $J = 16.7, 1.4$  Hz, 1H), 2.26 (d,  $J = 16.5$  Hz, 1H), 2.08–2.03 (m, 1H), 1.53–1.33 (m, 11H); <sup>13</sup>C NMR (100 MHz, CDCl<sub>3</sub>)  $\delta$  170.9, 75.2, 41.9, 39.4, 37.8, 35.7, 34.2, 32.7, 25.6, 21.6, 21.3; IR (neat): 2927, 2853, 1741, 1243, 1202, 1102, 1052, 1035, 913, 739 cm<sup>-1</sup>; HRMS (EI) calcd for C<sub>11</sub>H<sub>17</sub>BrO<sub>2</sub>: 260.0412 ([M]<sup>+</sup>), found 260.0412.

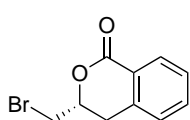

**3o**:<sup>S11</sup> [ $\alpha$ ]<sup>19</sup><sub>D</sub> +34.7 ( $c = 0.83$ , CHCl<sub>3</sub>, 67:33 er), [ $\alpha$ ]<sup>21</sup><sub>D</sub> +29.1 ( $c = 1.4$ , CH<sub>2</sub>Cl<sub>2</sub>, 67:33 er); HPLC analysis: Daicel Chiralpak AS-3, hexane/2-propanol = 1:1, flow rate = 0.5 mL/min, 254 nm; retention time: 18.7

min (major) and 26.2 min (minor). <sup>1</sup>H NMR (400 MHz, CDCl<sub>3</sub>)  $\delta$  8.11 (dd,  $J = 7.8, 0.9$  Hz, 1H), 7.58 (td,  $J = 7.4, 1.4$  Hz, 1H), 7.43 (t,  $J = 7.7$  Hz, 1H), 7.30 (d,  $J = 7.5$  Hz, 1H), 4.78–4.72 (m, 1H), 3.69 (dd,  $J = 10.7, 4.6$  Hz, 1H), 3.60 (dd,  $J = 10.7, 7.1$  Hz, 1H), 3.24–3.15 (m, 2H); <sup>13</sup>C NMR (100 MHz, CDCl<sub>3</sub>)  $\delta$  164.3, 137.8, 134.1, 130.4, 128.0, 127.7,

124.5, 76.7, 32.4, 31.5; IR (neat): 1727, 1278, 1242, 1120, 1085, 1032, 913, 741  $\text{cm}^{-1}$ ; HRMS (EI) calcd for  $\text{C}_{10}\text{H}_9\text{BrO}_2$ : 239.9786 ( $[\text{M}]^+$ ), found 239.9786.

#### Asymmetric bromolactonization of **2a** on a larger scale (Scheme 5).

In a manner similar to our previous report,<sup>S8</sup> a solution of substrate **2a** (266 mg, 1.0 mmol) and catalyst (*S*)-**1g** (60.1 mg, 0.10 mmol, 10 mol %) in  $\text{CH}_2\text{Cl}_2$  (15 mL)-toluene (5 mL) was cooled to  $-78\text{ }^\circ\text{C}$ . After stirring for 10 min at  $-78\text{ }^\circ\text{C}$ , *N*-bromophthalimide (NBP) (271 mg, 1.2 mmol) was added to the cooled reaction solution. The reaction mixture was stirred for 24 h at  $-78\text{ }^\circ\text{C}$ . After 24 h, the reaction mixture was quenched with saturated aqueous  $\text{Na}_2\text{SO}_3$  (30 mL) at  $-78\text{ }^\circ\text{C}$  and stirred for 10 min at  $-78\text{ }^\circ\text{C}$ . The quenched reaction mixture was diluted with  $\text{CH}_2\text{Cl}_2$  (20 mL) and  $\text{H}_2\text{O}$  (20 mL), and the mixture was warmed to room temperature. The organic materials were extracted with  $\text{CH}_2\text{Cl}_2$  for three times (20 mL  $\times$  3). The combined extracts were dried over  $\text{Na}_2\text{SO}_4$  and concentrated. The residue was purified by flash column chromatography on silica gel (hexane/ethyl acetate = 40:1–3:1) to give product **3a** in 91% yield (314 mg, 0.91 mmol). The enantioselectivity of isolated product **3a** was determined by HPLC analysis on a chiral stationary phase (Daicel Chiralpak IE-3, hexane/2-propanol = 2:1, flow rate = 0.5 mL/min, 254 nm).

#### Transformations of **3a** (Scheme 5).

In a manner similar to our previous report,<sup>S8</sup> to a solution of **3a** (34.5 mg, 0.10 mmol) in  $\text{CH}_3\text{CN}$  (1 mL) was added  $\text{K}_2\text{CO}_3$  (41.5 mg, 0.30 mmol) and thiophenol (33.1 mg, 0.30 mmol). The reaction mixture was warmed to  $75\text{ }^\circ\text{C}$  and stirred for 3 h at  $75\text{ }^\circ\text{C}$ . After 3 h, the reaction mixture was cooled to  $0\text{ }^\circ\text{C}$  and quenched with saturated aqueous  $\text{NH}_4\text{Cl}$  (5 mL). After evaporation to remove  $\text{CH}_3\text{CN}$ , the organic materials were extracted with ethyl acetate for three times (5 mL  $\times$  3). The combined extracts were dried over  $\text{Na}_2\text{SO}_4$  and concentrated. The residue was purified by flash column chromatography on silica gel (hexane/ethyl acetate = 40:1–3:1 as eluent) to give product **7** in 95% yield (35.6 mg, 0.095 mmol).

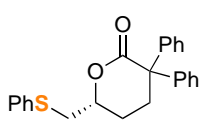

**7:**  $[\alpha]^{20}_D -19.6$  ( $c = 1.1$ ,  $\text{CHCl}_3$ , 89:11 er); HPLC analysis: Daicel Chiralpak IE-3, hexane/2-propanol = 2:1, flow rate = 0.5 mL/min, 254 nm; retention time: 37.9 min (major) and 39.5 min (minor).  $^1\text{H NMR}$  (400 MHz,  $\text{CDCl}_3$ )  $\delta$  7.35–7.24 (m, 10H), 7.22–7.15 (m, 5H), 4.46–4.39 (m, 1H), 3.32 (dd,  $J = 13.7, 4.6$  Hz, 1H), 2.95 (dd,  $J = 13.7, 8.2$  Hz, 1H), 2.74–2.59 (m, 2H), 2.18–2.05 (m, 1H), 1.83–1.70 (m, 1H);  $^{13}\text{C NMR}$  (100 MHz,  $\text{CDCl}_3$ )  $\delta$  172.8, 142.3, 141.5, 134.9, 129.9, 129.1, 128.4, 128.3, 128.11, 128.06, 127.4, 127.2, 126.7, 78.5, 56.9, 39.0, 31.9, 24.6; IR (neat): 3059, 2960, 2926, 1733, 1496, 1445, 1255, 1166, 1120, 1091, 1054, 745  $\text{cm}^{-1}$ ; HRMS (EI) calcd for  $\text{C}_{24}\text{H}_{22}\text{O}_2\text{S}$ : 374.1341 ( $[\text{M}]^+$ ), found 374.1341.

In a manner similar to our previous report,<sup>S8</sup> to a solution of **3a** (34.5 mg, 0.10 mmol) in *N,N*-dimethylformamide (2 mL) was added sodium azide (19.5 mg, 0.30 mmol). The reaction mixture was warmed to 100 °C and stirred for 24 h at 100 °C. After 24 h, the reaction mixture was cooled to 0 °C and quenched with  $\text{H}_2\text{O}$  (20 mL). The organic materials were extracted with ethyl acetate for three times (5 mL  $\times$  3). The combined extracts were dried over  $\text{Na}_2\text{SO}_4$  and concentrated. The residue was purified by flash column chromatography on silica gel (hexane/ethyl acetate = 40:1–3:1 as eluent) to give product **8** in 96% yield (29.5 mg, 0.096 mmol).

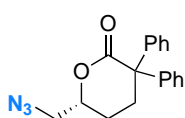

**8:**  $[\alpha]^{23}_D -74.3$  ( $c = 1.2$ ,  $\text{CHCl}_3$ , 89:11 er); HPLC analysis: Daicel Chiralpak IE-3, hexane/2-propanol = 2:1, flow rate = 0.5 mL/min, 254 nm; retention time: 22.1 min (major) and 25.4 min (minor).  $^1\text{H NMR}$  (400 MHz,  $\text{CDCl}_3$ )  $\delta$  7.39–7.24 (m, 8H), 7.17–7.14 (m, 2H), 4.45–4.39 (m, 1H), 3.48 (dd,  $J = 13.2, 4.2$  Hz, 1H), 3.35 (dd,  $J = 13.2, 4.9$  Hz, 1H), 2.81–2.74 (m, 1H), 2.70–2.63 (m, 1H), 1.95–1.84 (m, 2H);  $^{13}\text{C NMR}$  (100 MHz,  $\text{CDCl}_3$ )  $\delta$  172.5, 142.2, 140.9, 128.6, 128.4, 128.1, 127.6, 127.3, 77.8, 56.8, 54.4, 31.6, 22.6; IR (neat): 3059, 2955, 2937, 2099, 1732, 1496, 1446, 1287, 1257, 1172, 1122, 1100, 752, 698  $\text{cm}^{-1}$ ; HRMS (EI) calcd for  $\text{C}_{18}\text{H}_{17}\text{N}_3\text{O}_2$ : 307.1321 ( $[\text{M}]^+$ ), found 307.1321.

In a manner similar to our previous report,<sup>S8</sup> to a solution of **3a** (34.5 mg, 0.10 mmol) in MeOH (1 mL) was added  $\text{K}_2\text{CO}_3$  (27.6 mg, 0.20 mmol) at room temperature.

The reaction mixture was stirred for 48 h at room temperature. After 48 h, the reaction mixture was quenched with H<sub>2</sub>O (10 mL). The organic materials were extracted with ethyl acetate for three times (5 mL × 3). The combined extracts were dried over Na<sub>2</sub>SO<sub>4</sub> and concentrated. The residue was purified by flash column chromatography on silica gel (hexane/ethyl acetate = 20:1–3:1 as eluent) to give product **9** in 73% yield (21.6 mg, 0.073 mmol).

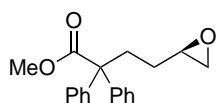

**9**:  $[\alpha]_D^{22} +2.6$  ( $c = 0.99$ , CHCl<sub>3</sub>, 89:11 er); HPLC analysis: Daicel Chiralpak IB-3, hexane/2-propanol = 20:1, flow rate = 0.5 mL/min, 254 nm; retention time: 12.7 min (major) and 15.0 min (minor). <sup>1</sup>H NMR (400 MHz, CDCl<sub>3</sub>)  $\delta$  7.33–7.22 (m, 10H), 3.69 (s, 3H), 2.88–2.83 (m, 1H), 2.70 (dd,  $J = 4.8, 4.1$  Hz, 1H), 2.59 (ddd,  $J = 13.2, 11.2, 5.2$  Hz, 1H), 2.48 (ddd,  $J = 13.2, 11.2, 5.2$  Hz, 1H), 2.38 (dd,  $J = 4.8, 2.8$  Hz, 1H), 1.39–1.23 (m, 2H); <sup>13</sup>C NMR (100 MHz, CDCl<sub>3</sub>)  $\delta$  174.6, 142.5, 142.4, 128.82, 128.80, 128.0, 126.93, 126.89, 59.9, 52.4, 52.3, 47.0, 34.2, 28.5; IR (neat): 3057, 2950, 1729, 1496, 1445, 1224, 731, 700 cm<sup>-1</sup>; HRMS (EI) calcd for C<sub>19</sub>H<sub>20</sub>O<sub>3</sub>: 296.1412 ([M]<sup>+</sup>), found 296.1412.

### Determination of the absolute configuration of products.

Absolute stereochemistry of bromolactonization product **3o** was confirmed by comparison with reported data.<sup>S11</sup>

## References

- S1. Nishiyori, R.; Tsuchihashi, A.; Mochizuki, A.; Kaneko, K.; Yamanaka, M.; Shirakawa, S. *Chem. – Eur. J.* **2018**, *24*, 16747–16752.
- S2. Mori, T.; Abe, K.; Shirakawa, S. *J. Org. Chem.* **2023**, *88*, 7830–7838.
- S3. Okada, M.; Kaneko, K.; Yamanaka, M.; Shirakawa, S. *Org. Biomol. Chem.* **2019**, *17*, 3747–3751.
- S4. Nishiyori, R.; Okada, M.; Maynard, J. R. J.; Shirakawa, S. *Asian J. Org. Chem.* **2021**, *10*, 1444–1448.
- S5. Tsuchihashi, A.; Shirakawa, S. *Synlett* **2019**, *30*, 1662–1666.
- S6. Takenaka, K.; Akita, M.; Tanigaki, Y.; Takizawa, S.; Sasai, H. *Org. Lett.* **2011**, *13*, 3506–3509.
- S7. Tsutsumi, T.; Saitoh, A.; Kasai, T.; Chu, MY.; Karanjit, S.; Nakayama, A.; Namba, K. *Tetrahedron Lett.* **2020**, *61*, 152047.
- S8. Mori, T.; Sumida, S.; Furuya, Y.; Shirakawa, S. *Synlett* **2024**, *35*, 479–483.
- S9. Moriyama, K.; Kuramochi, M.; Tsuzuki, S.; Fujii, K.; Morita, T. *Org. Lett.* **2021**, *23*, 268–273.
- S10. China, H.; Yatabe, H. Kageyama, N.; Fujitake, M.; Kikushima, K.; Dohi, T. *Russ. Chem. Bull.* **2020**, *69*, 1804–1810.
- S11. Armstrong, A.; Braddock, D. C.; Jones, A. X.; Clark, S. *Tetrahedron Lett.* **2013**, *54*, 7004–7008.

## NMR Charts

### 2b: $^1\text{H}$ and $^{13}\text{C}$ NMR

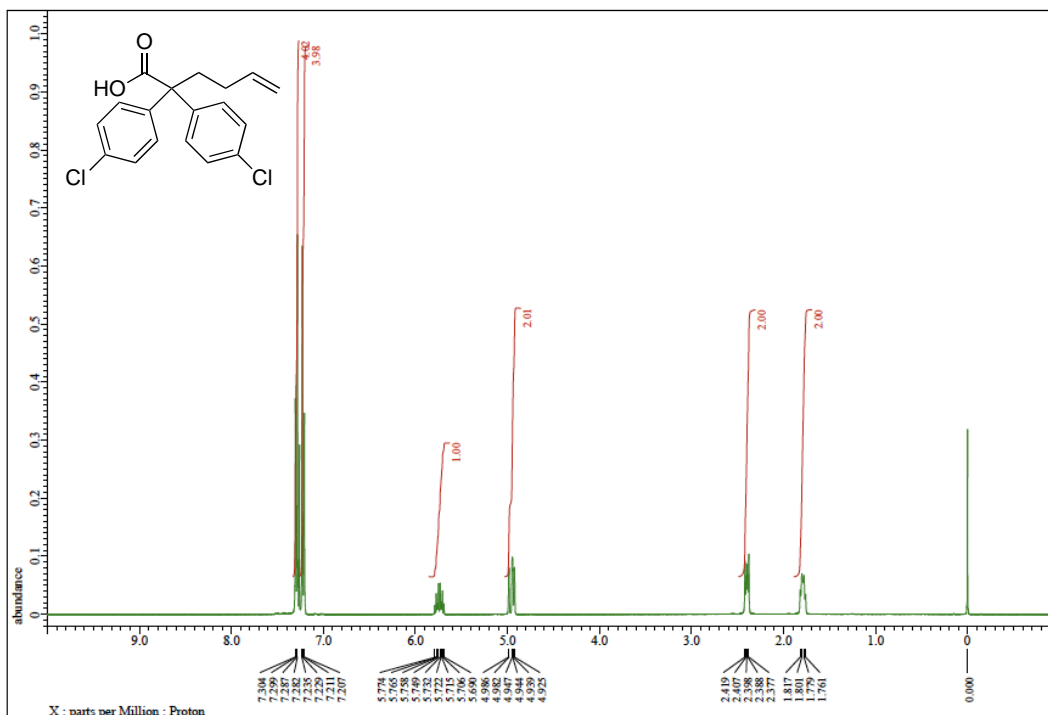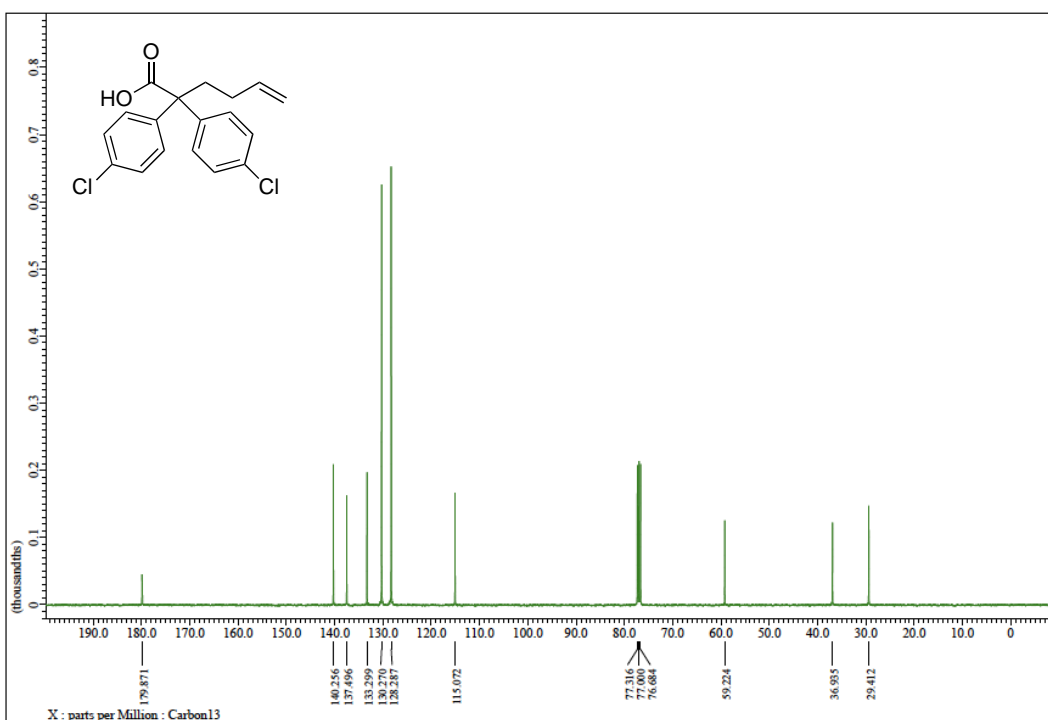

## 2c: $^1\text{H}$ and $^{13}\text{C}$ NMR

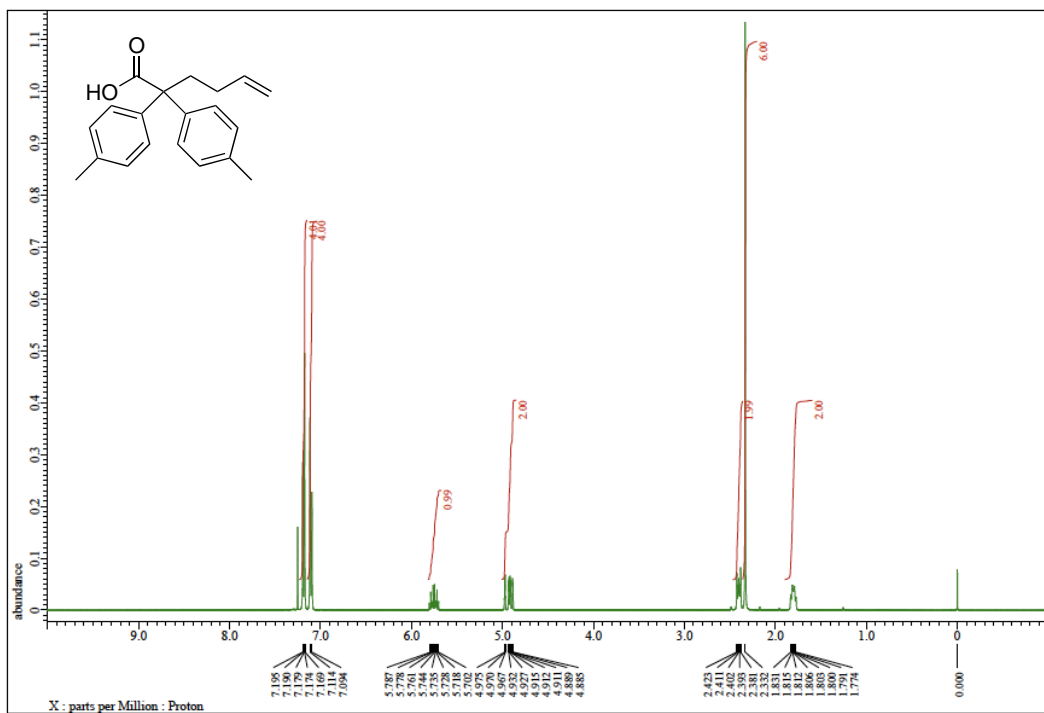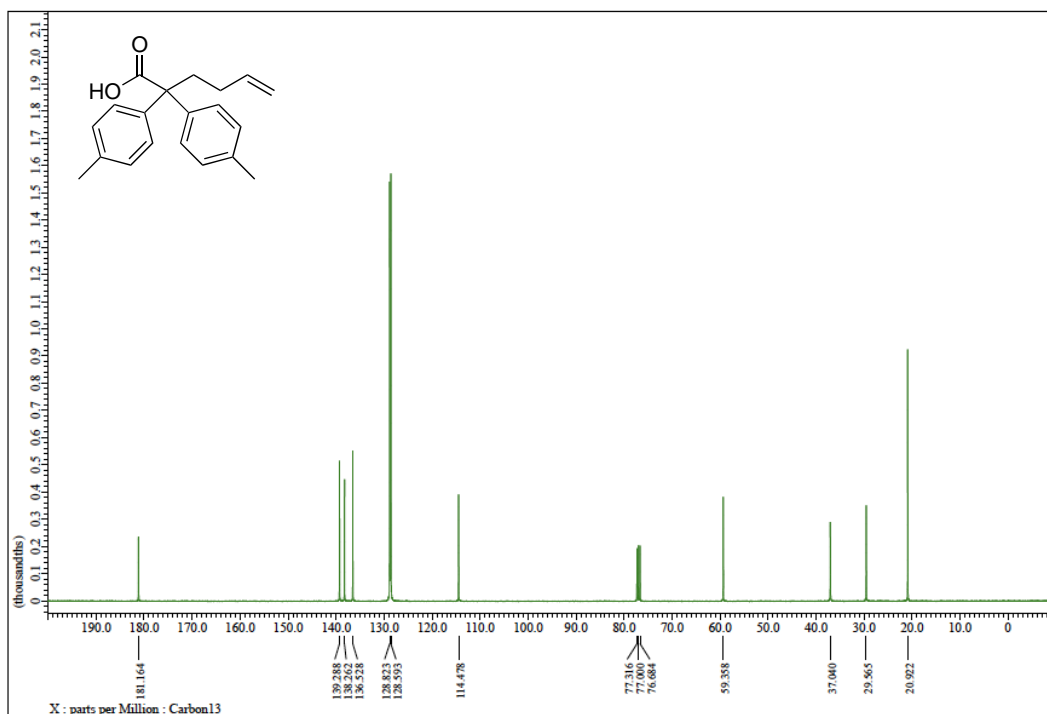



2d:  $^1\text{H}$  and  $^{13}\text{C}$  NMR

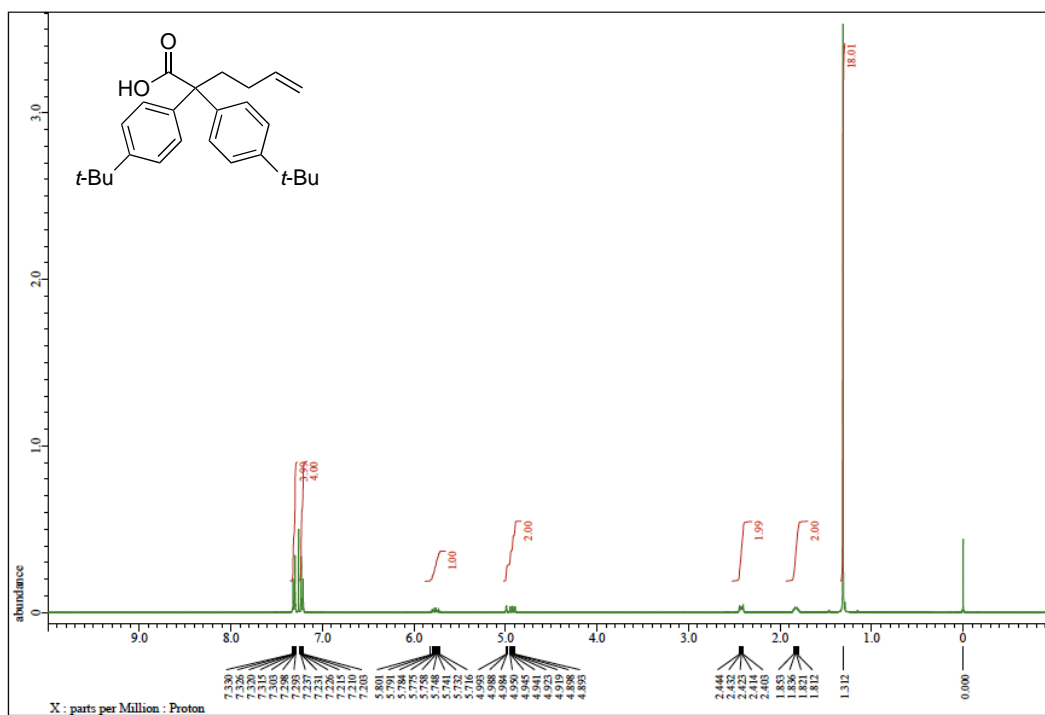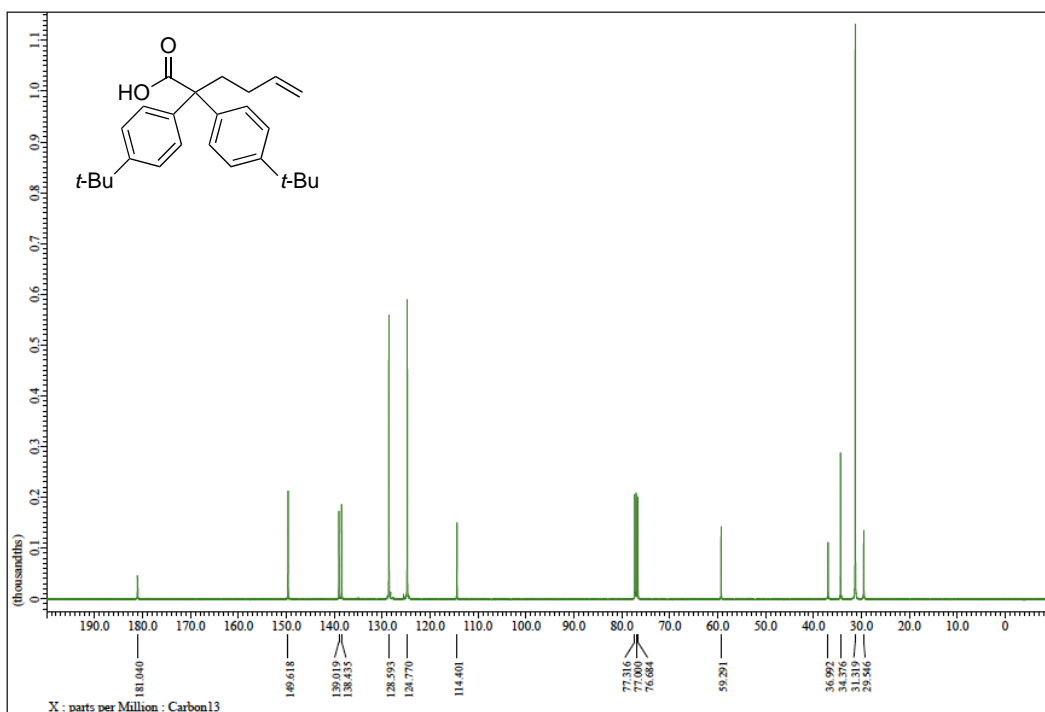

**2k:**  $^1\text{H}$  and  $^{13}\text{C}$  NMR

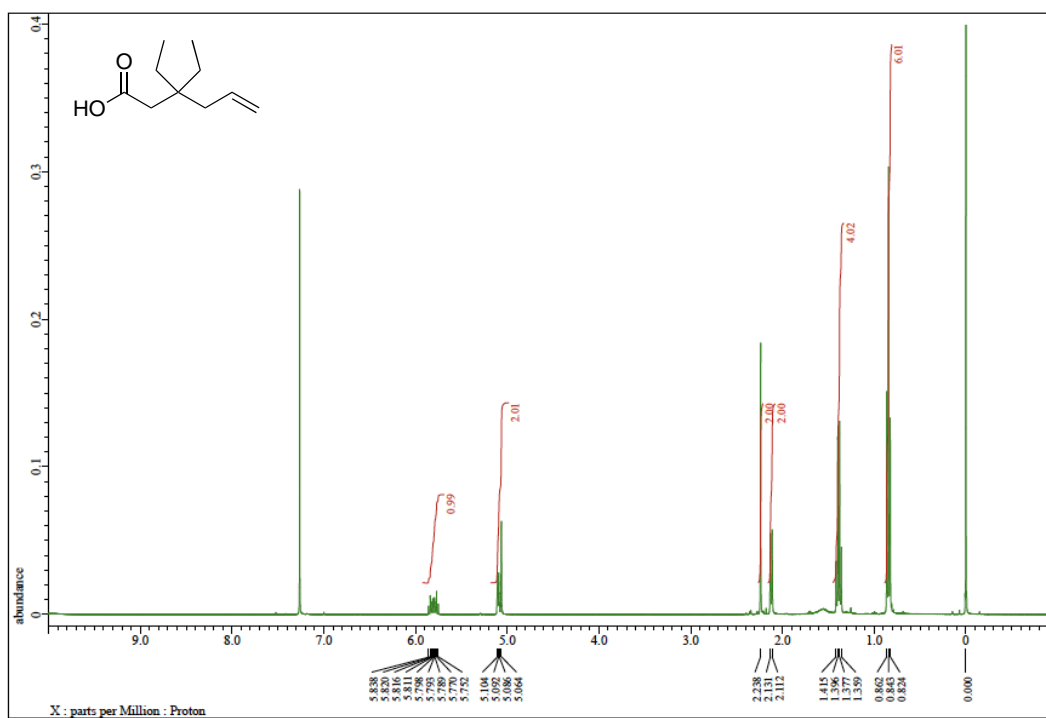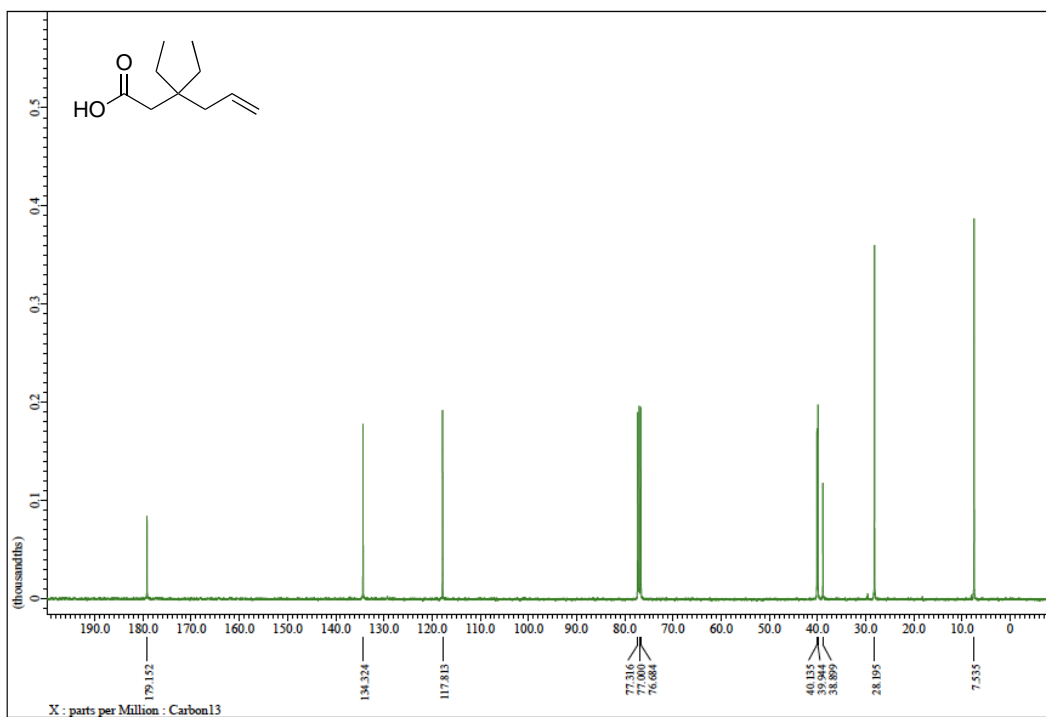

2l:  $^1\text{H}$  and  $^{13}\text{C}$  NMR

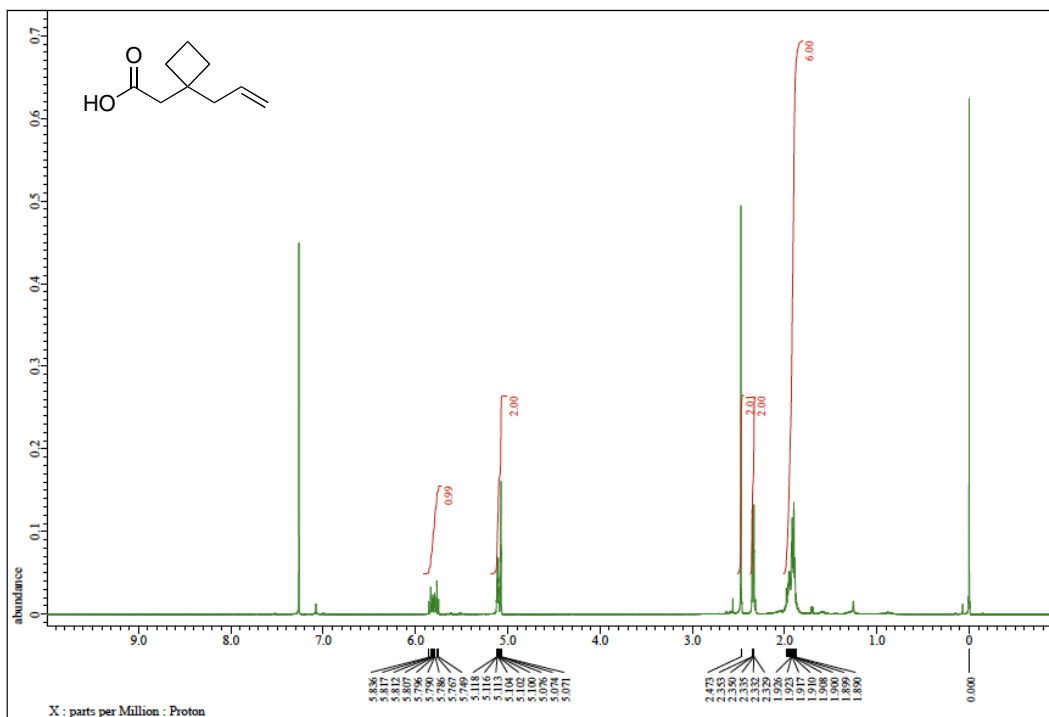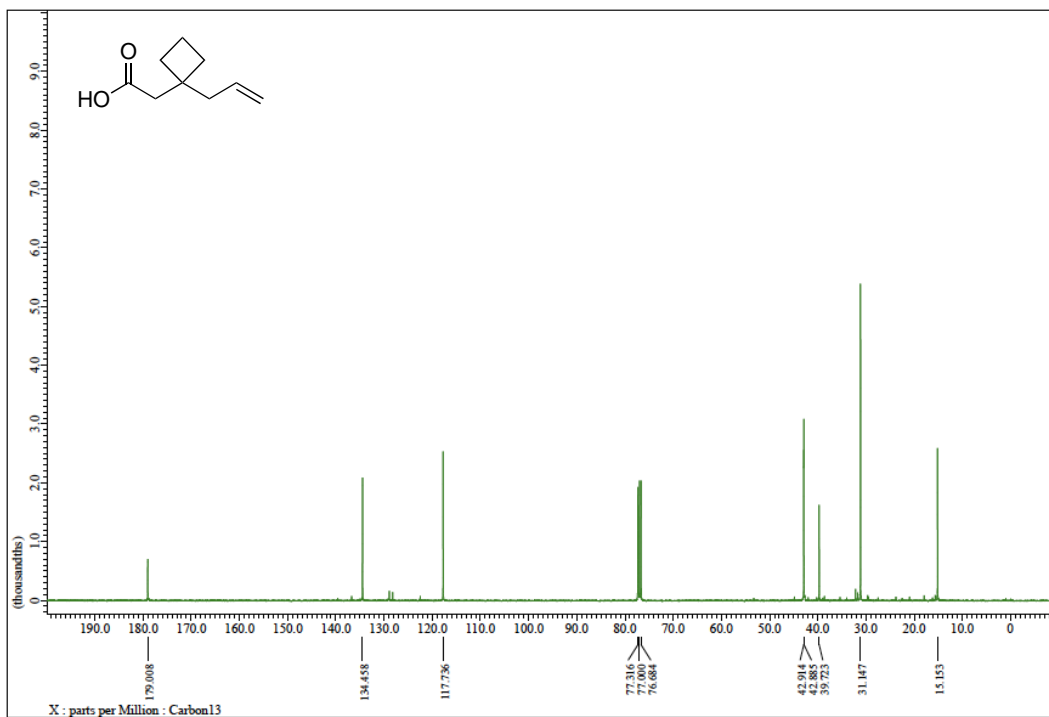

2m:  $^1\text{H}$  and  $^{13}\text{C}$  NMR

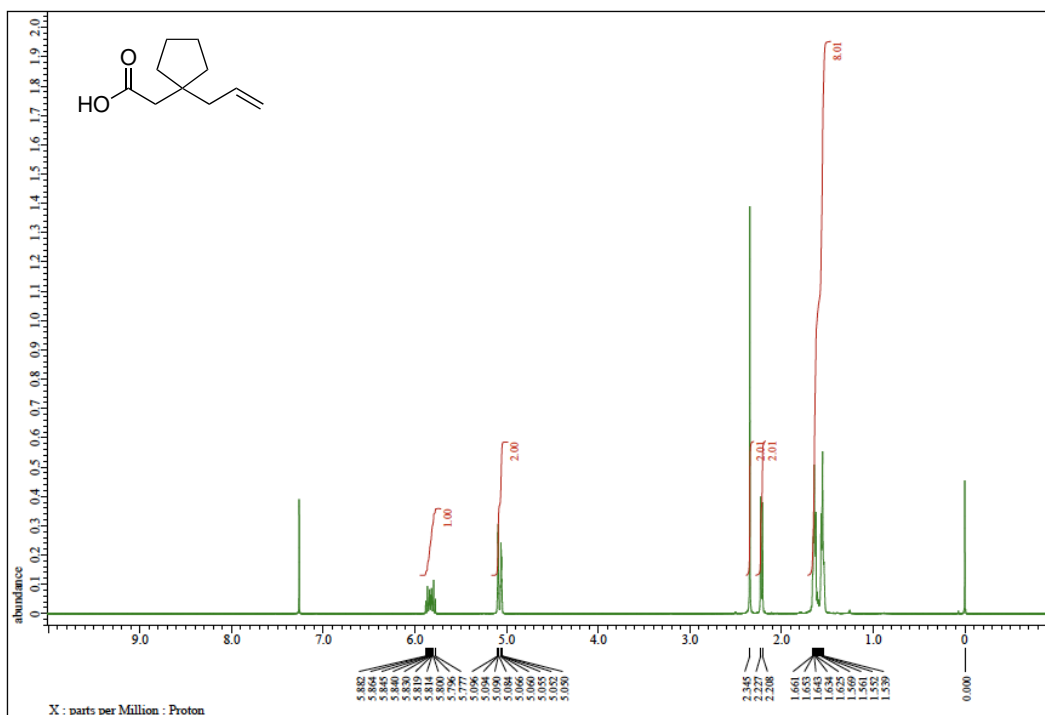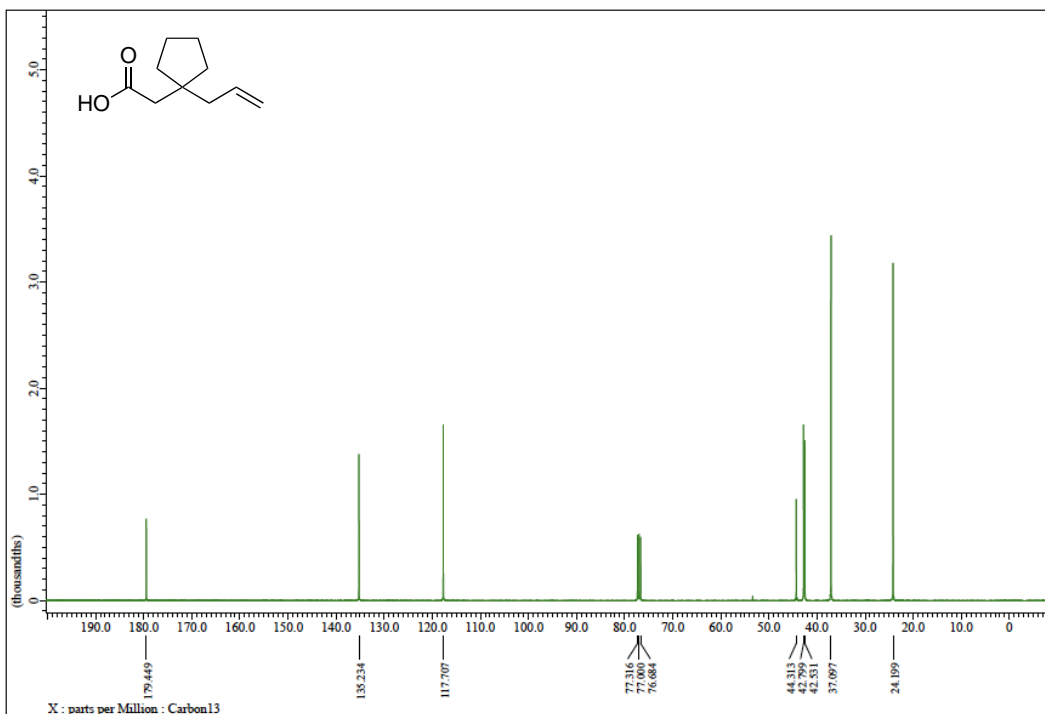

2n:  $^1\text{H}$  and  $^{13}\text{C}$  NMR

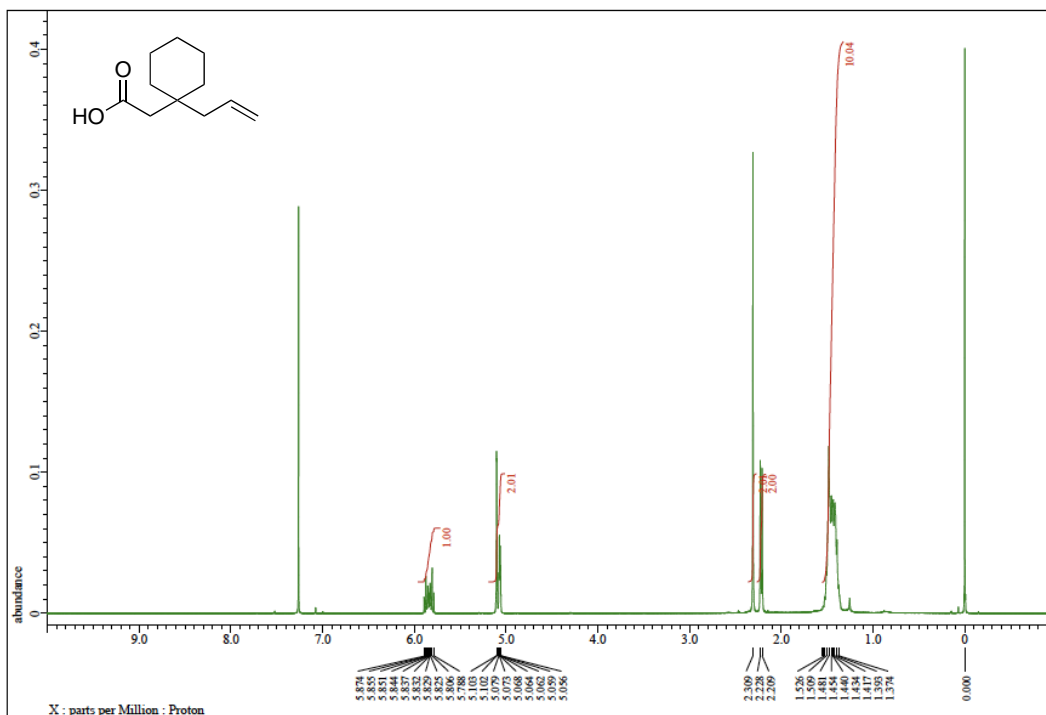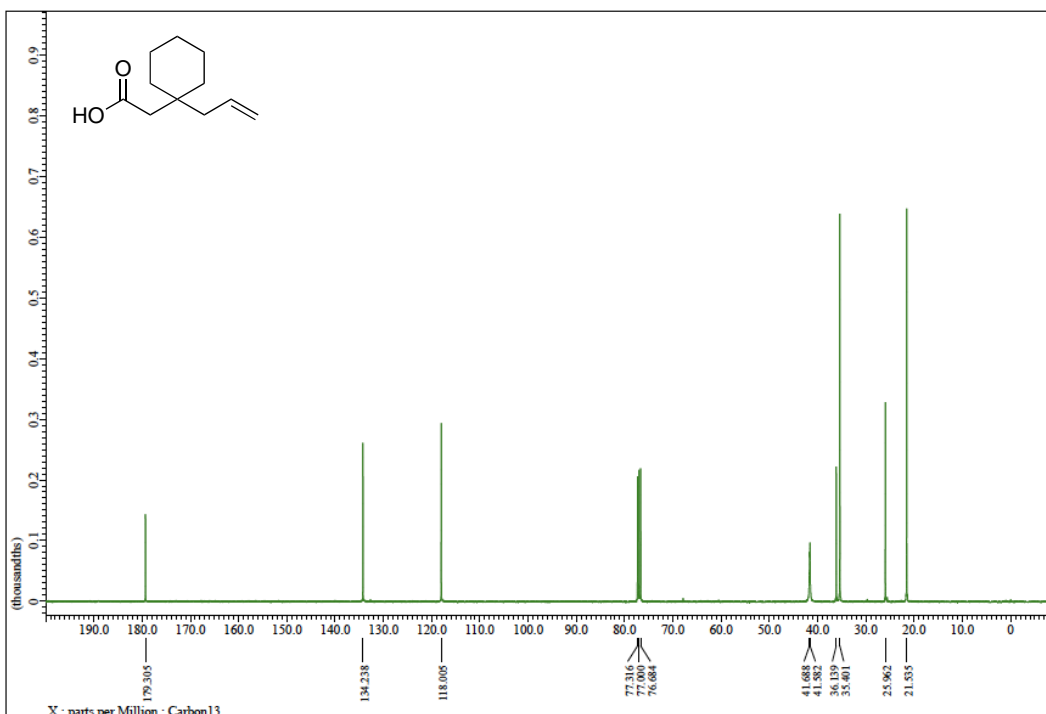

3a:  $^1\text{H}$  and  $^{13}\text{C}$  NMR

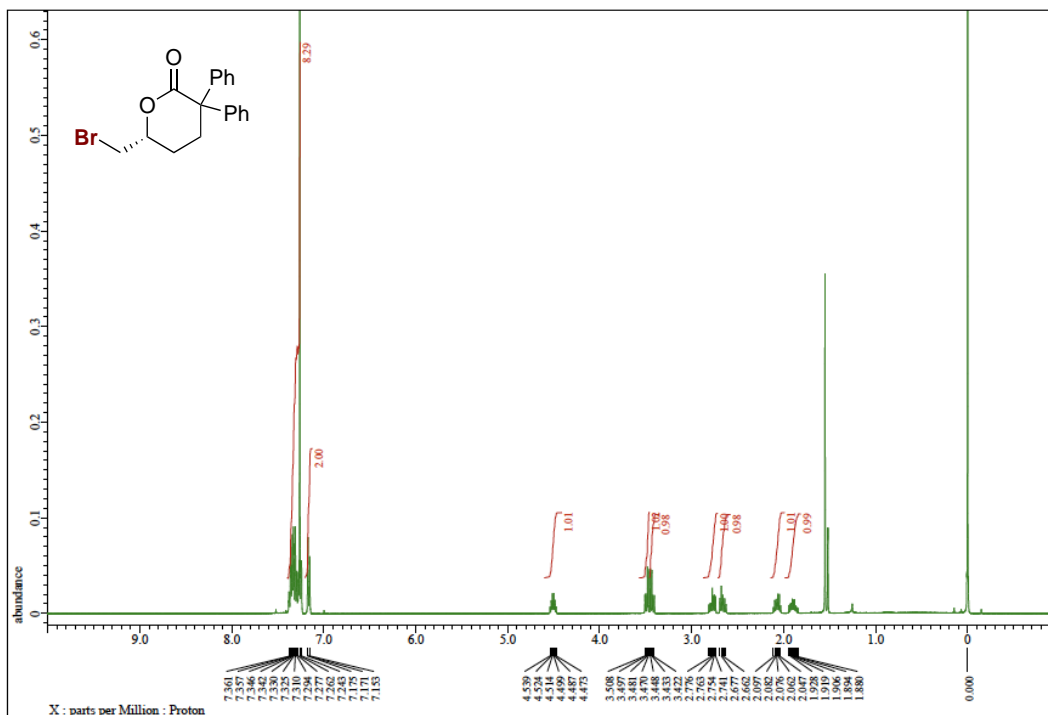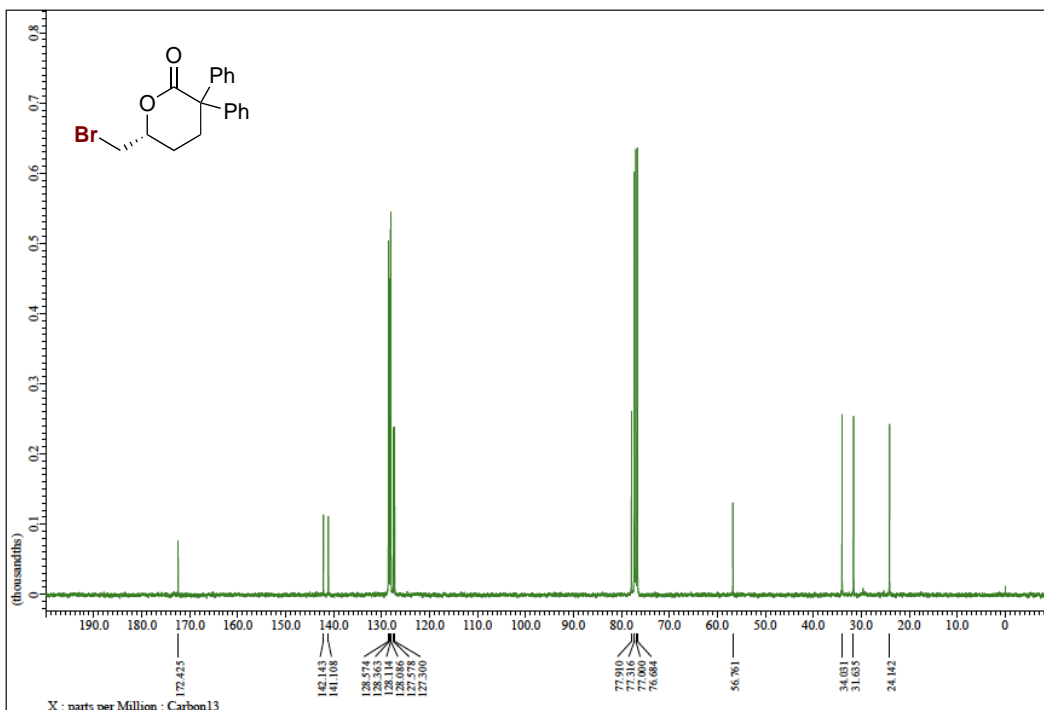

# Iodolactonization Product: $^1\text{H}$ and $^{13}\text{C}$ NMR

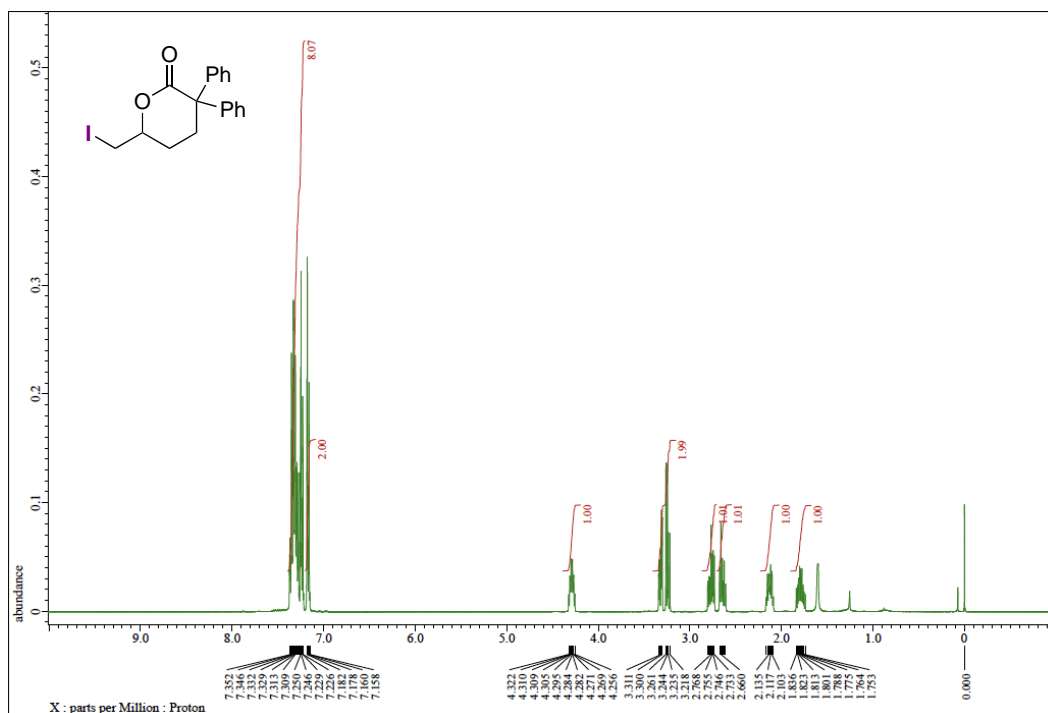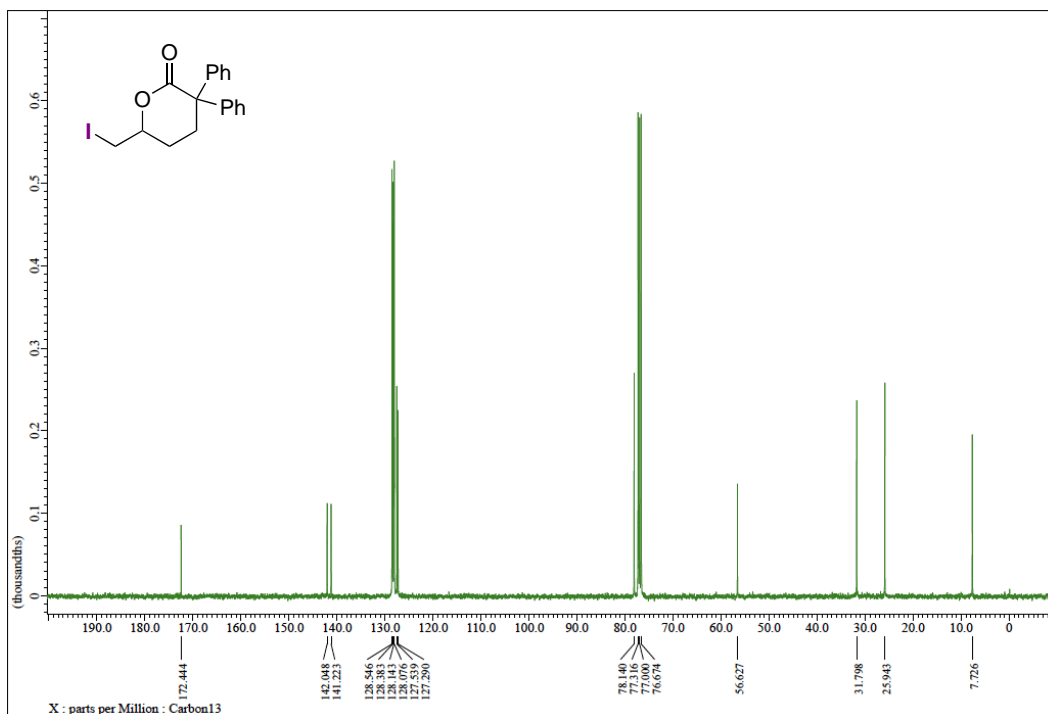

**3b:**  $^1\text{H}$  and  $^{13}\text{C}$  NMR

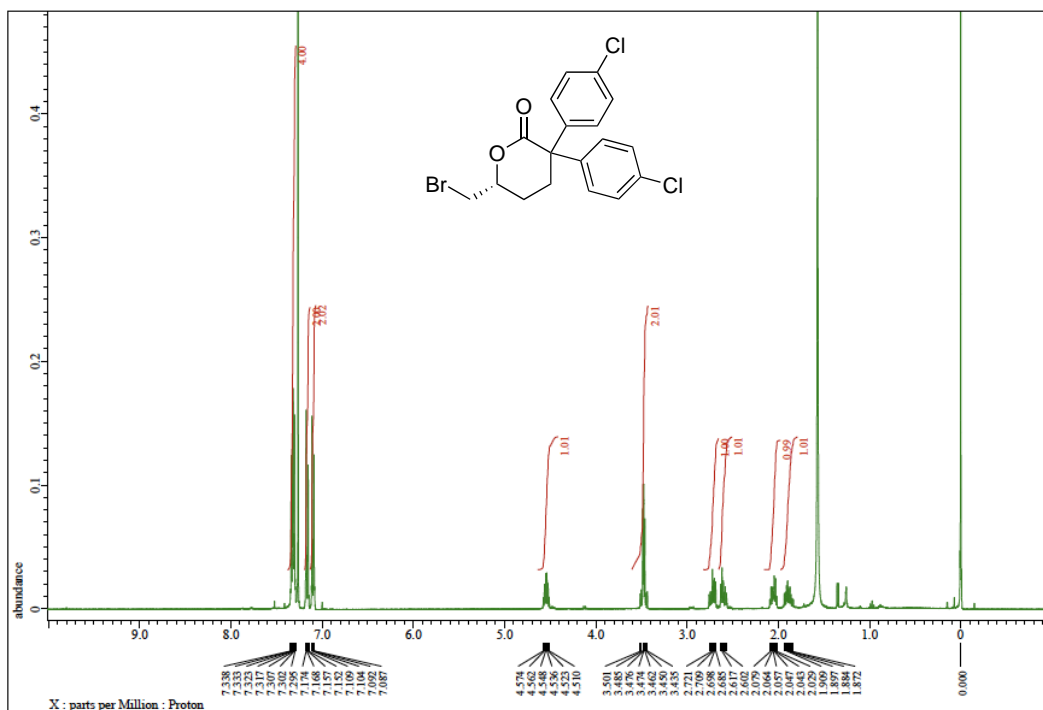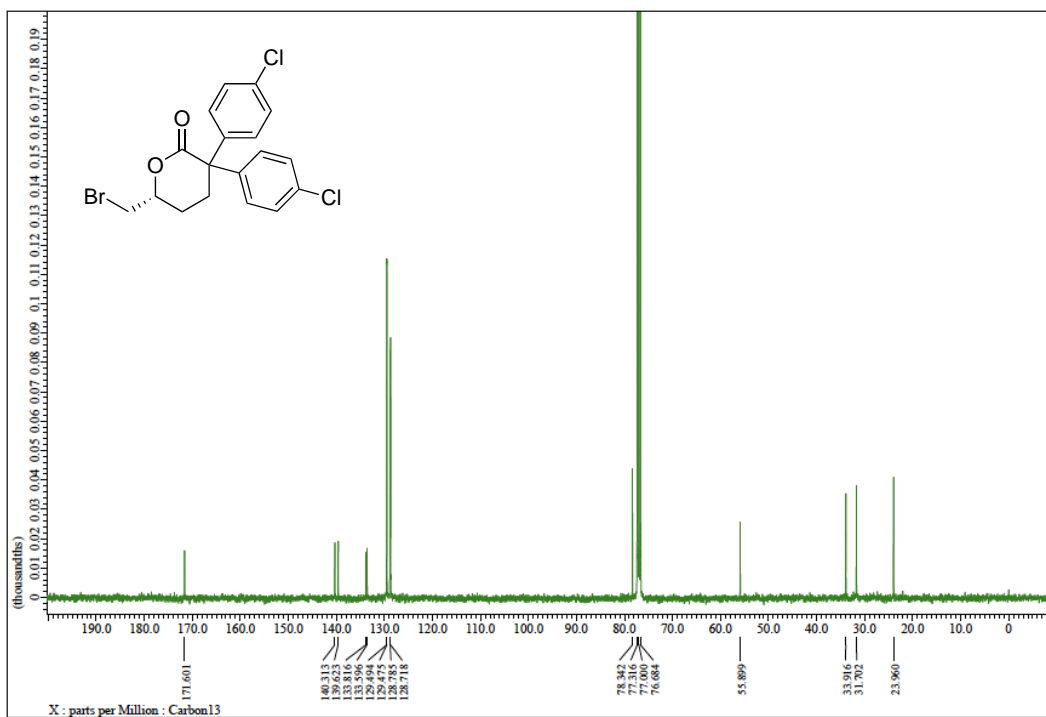



3c:  $^1\text{H}$  and  $^{13}\text{C}$  NMR

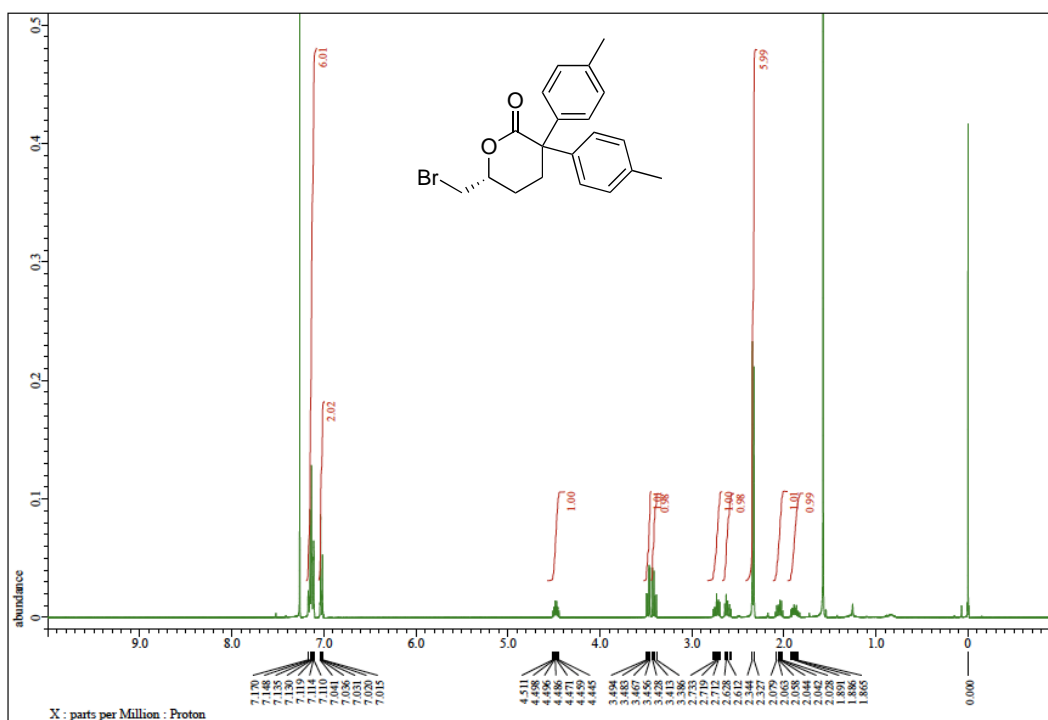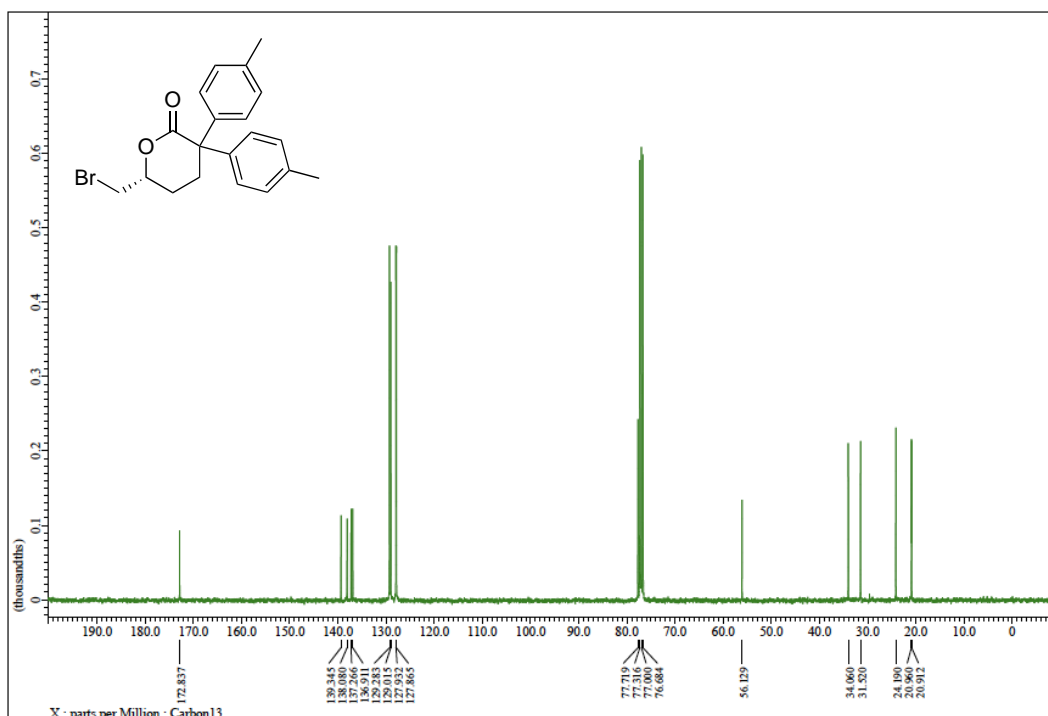

3d:  $^1\text{H}$  and  $^{13}\text{C}$  NMR

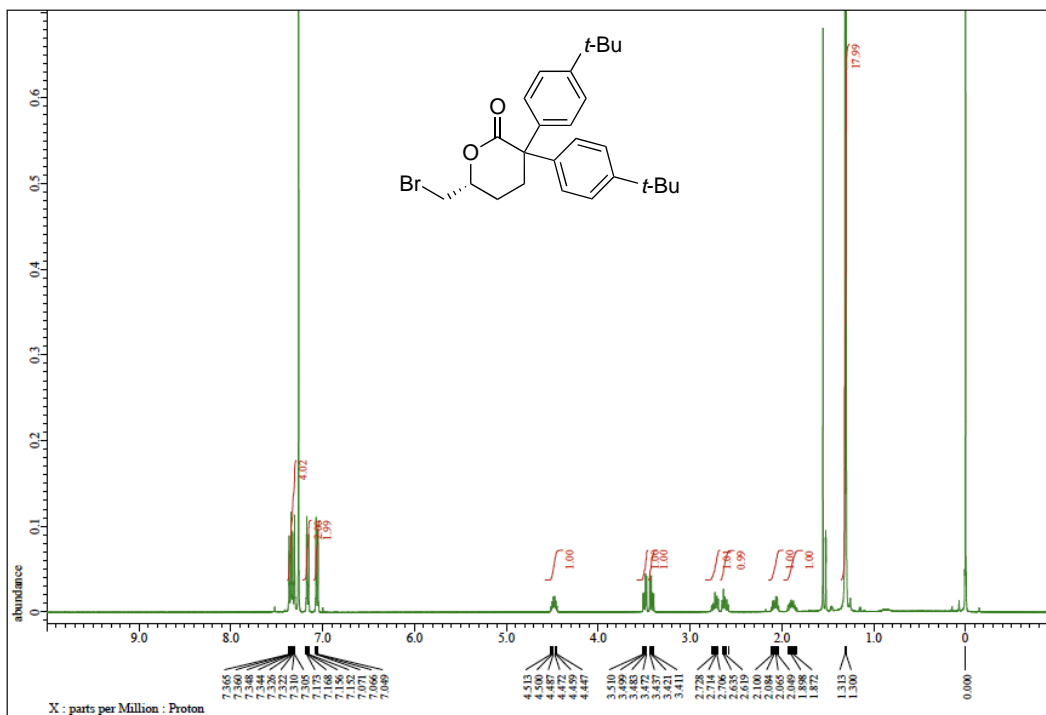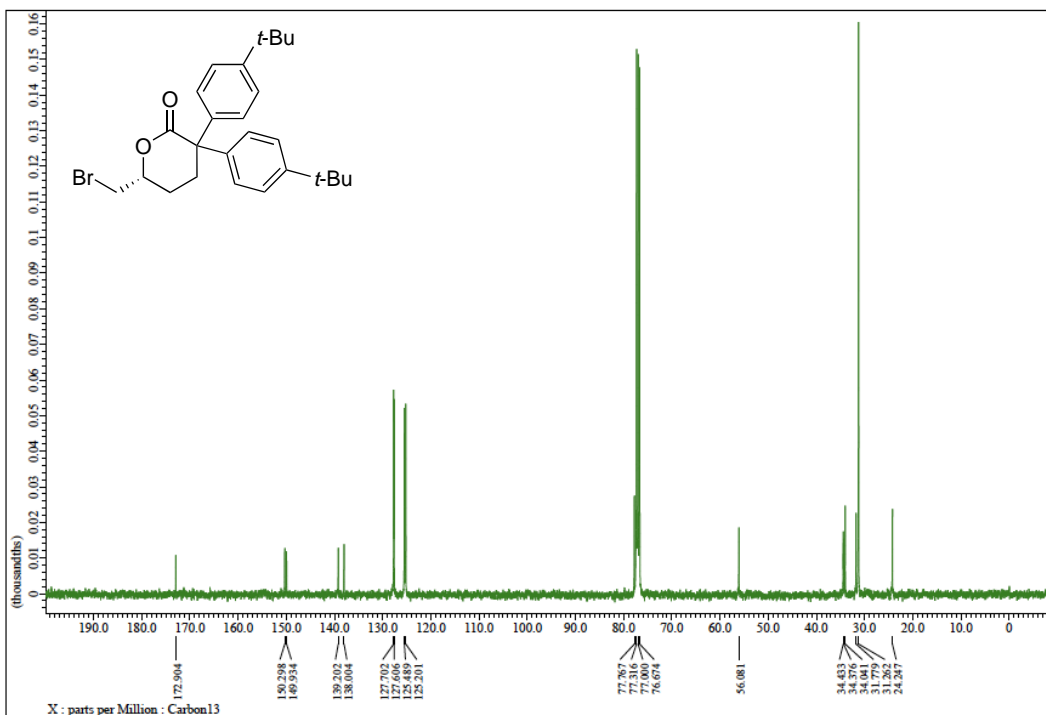

**3e:**  $^1\text{H}$  and  $^{13}\text{C}$  NMR

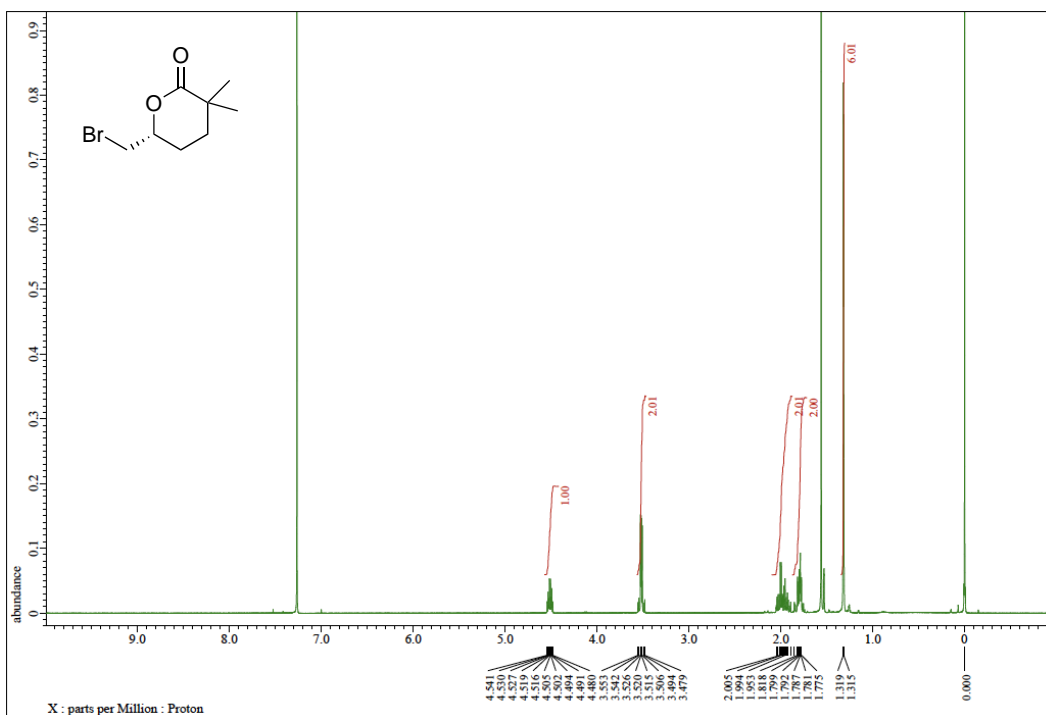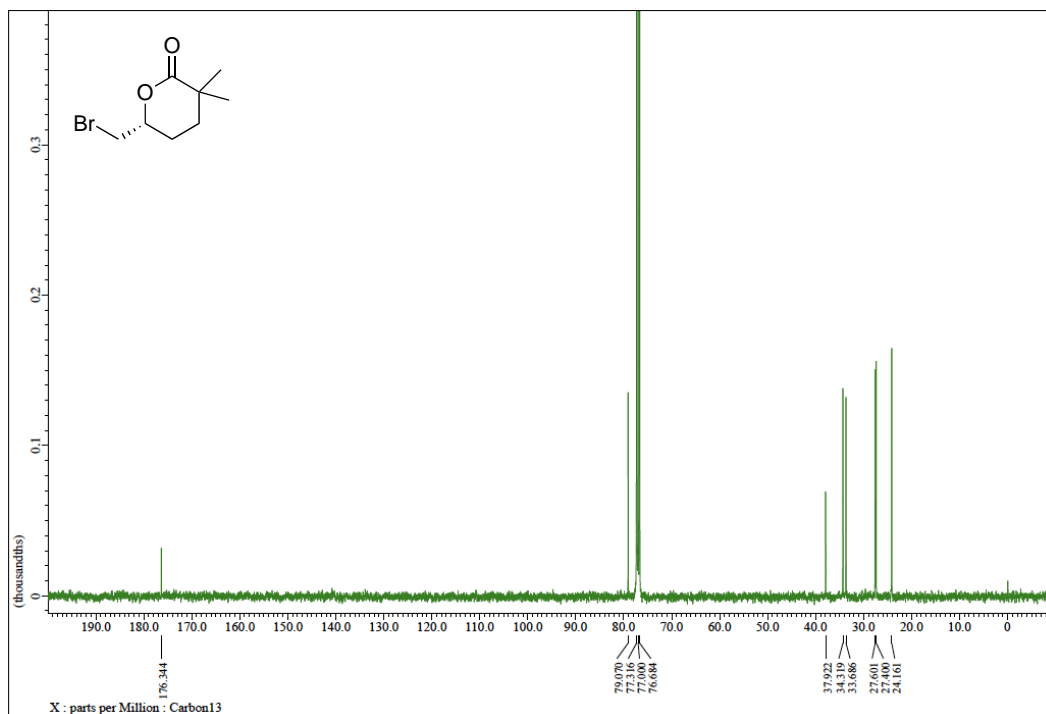

3f:  $^1\text{H}$  and  $^{13}\text{C}$  NMR

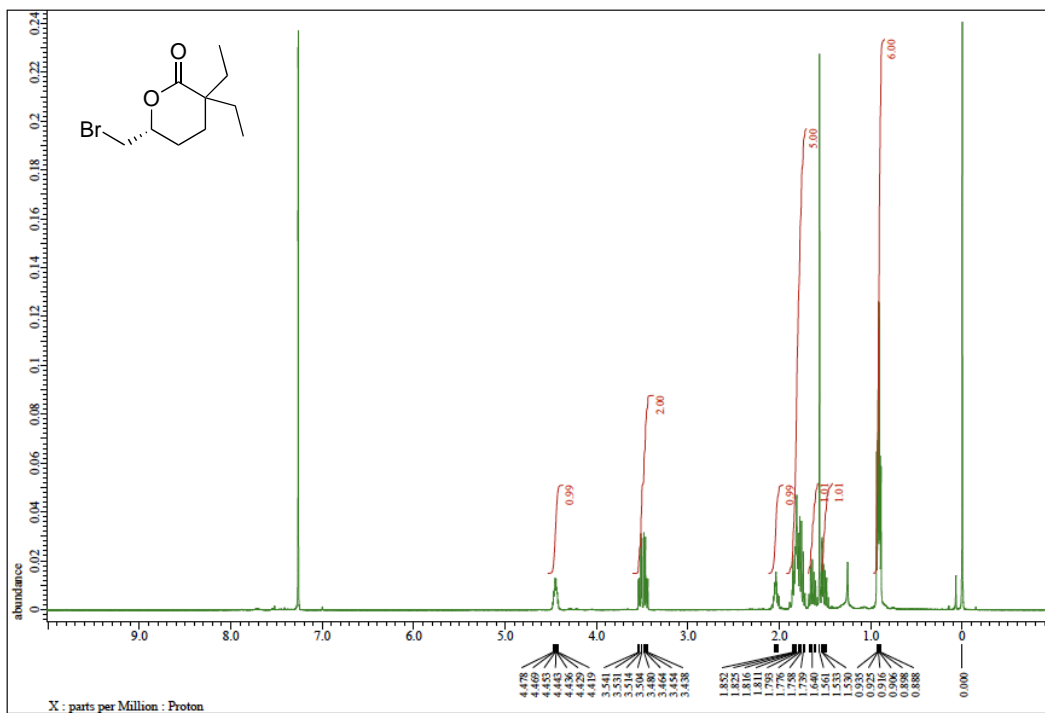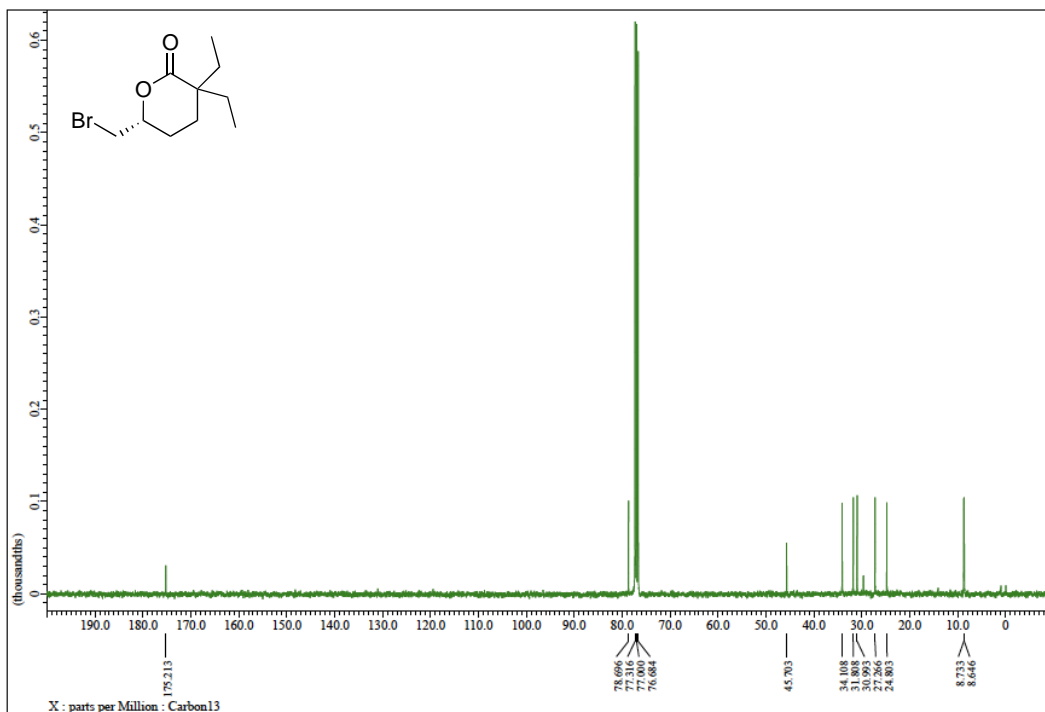

**3g:**  $^1\text{H}$  and  $^{13}\text{C}$  NMR

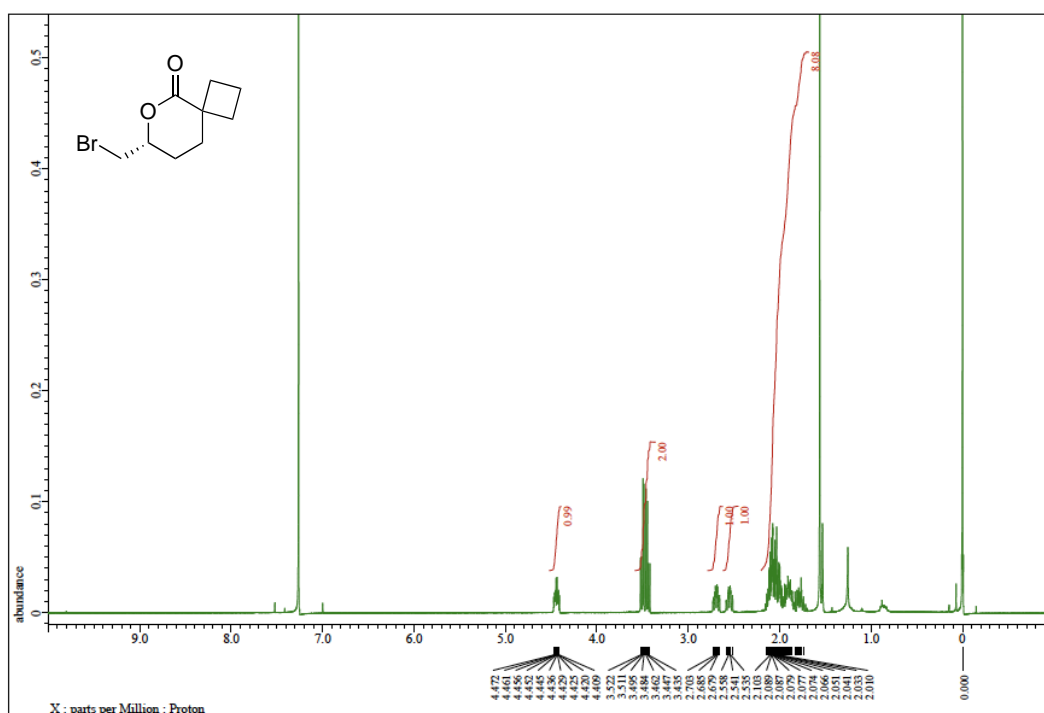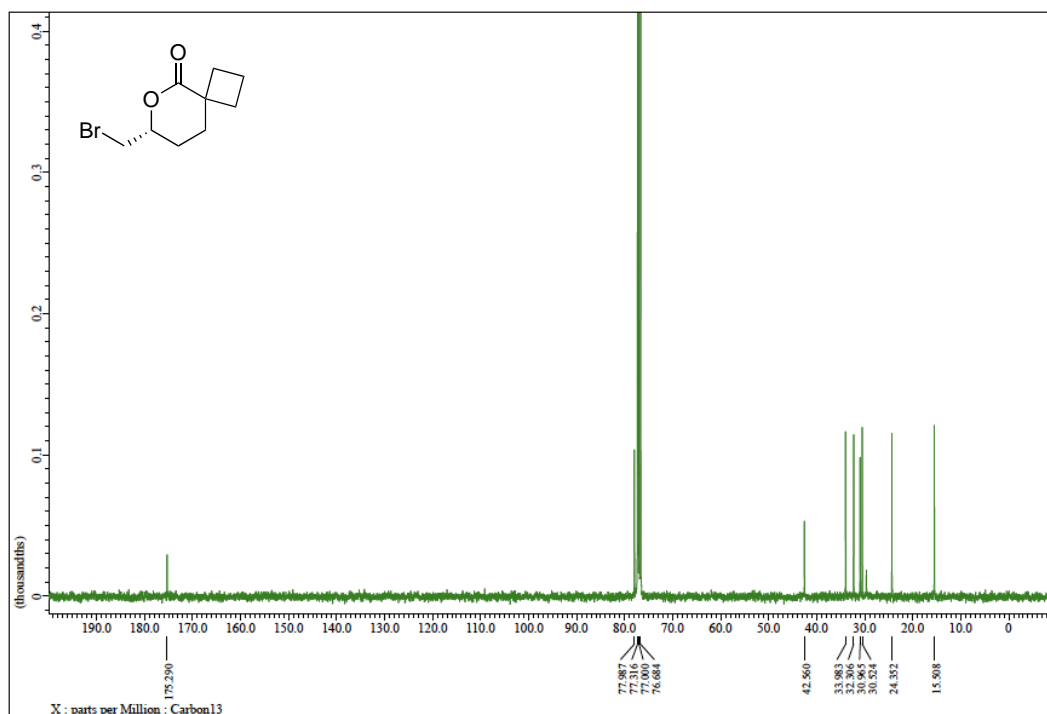

**3h:**  $^1\text{H}$  and  $^{13}\text{C}$  NMR

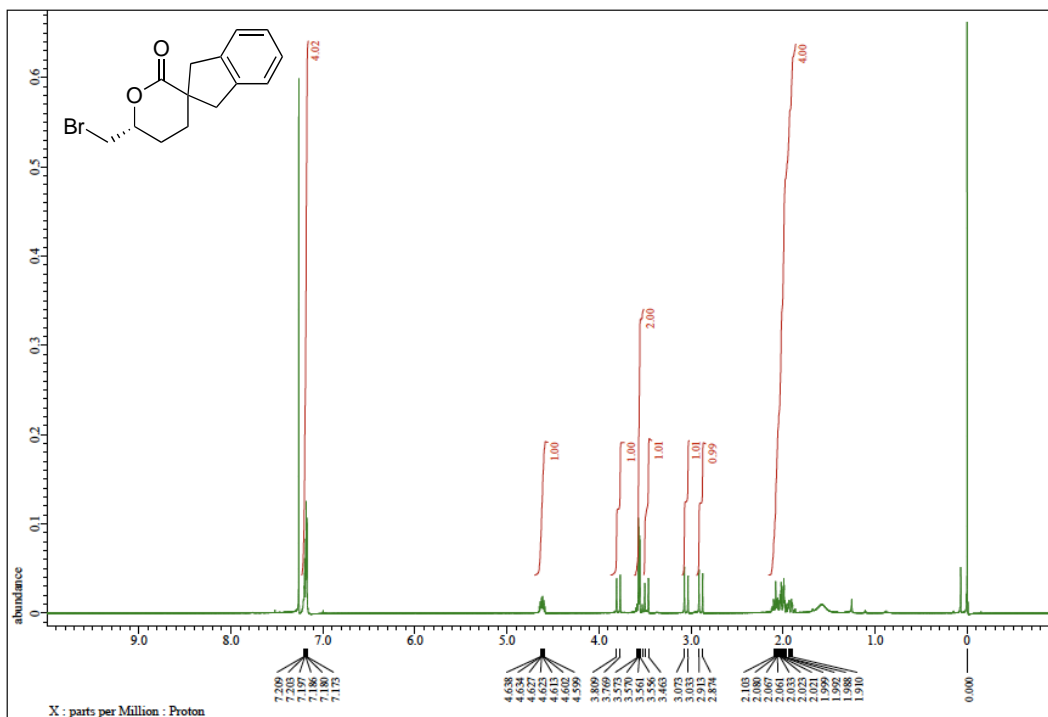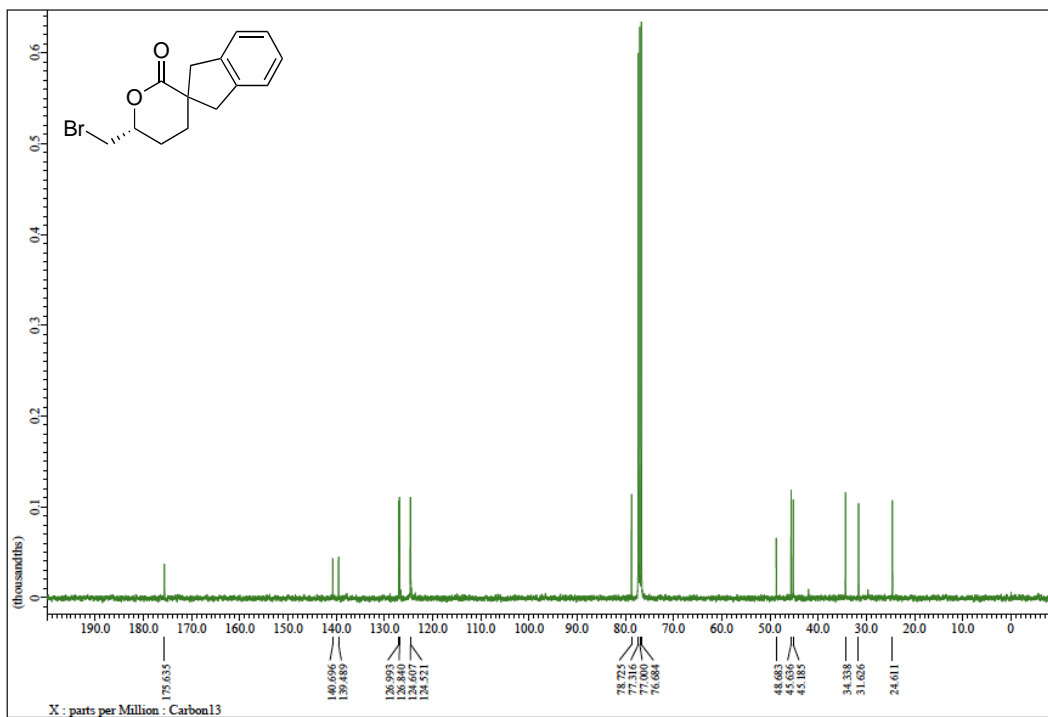

3i:  $^1\text{H}$  and  $^{13}\text{C}$  NMR

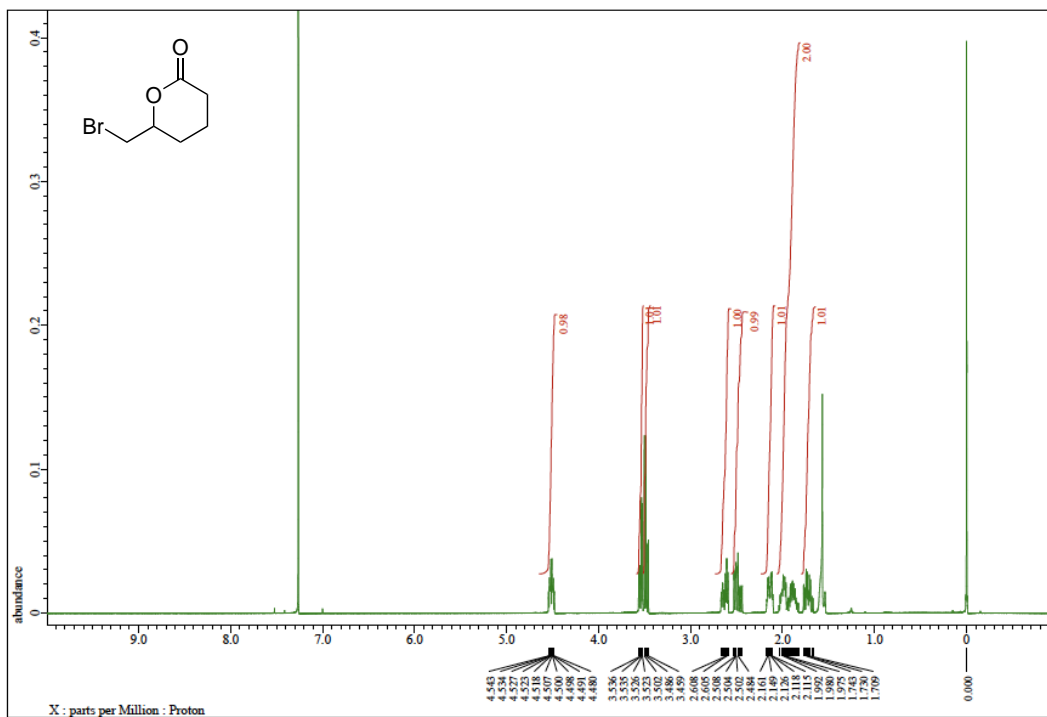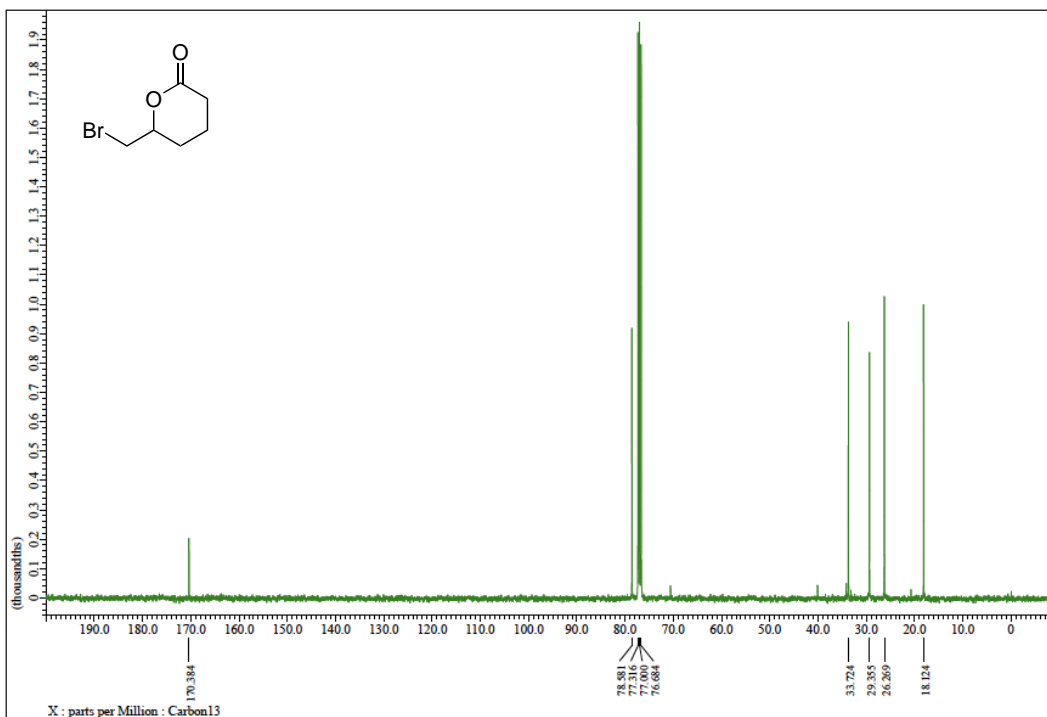

3j:  $^1\text{H}$  and  $^{13}\text{C}$  NMR

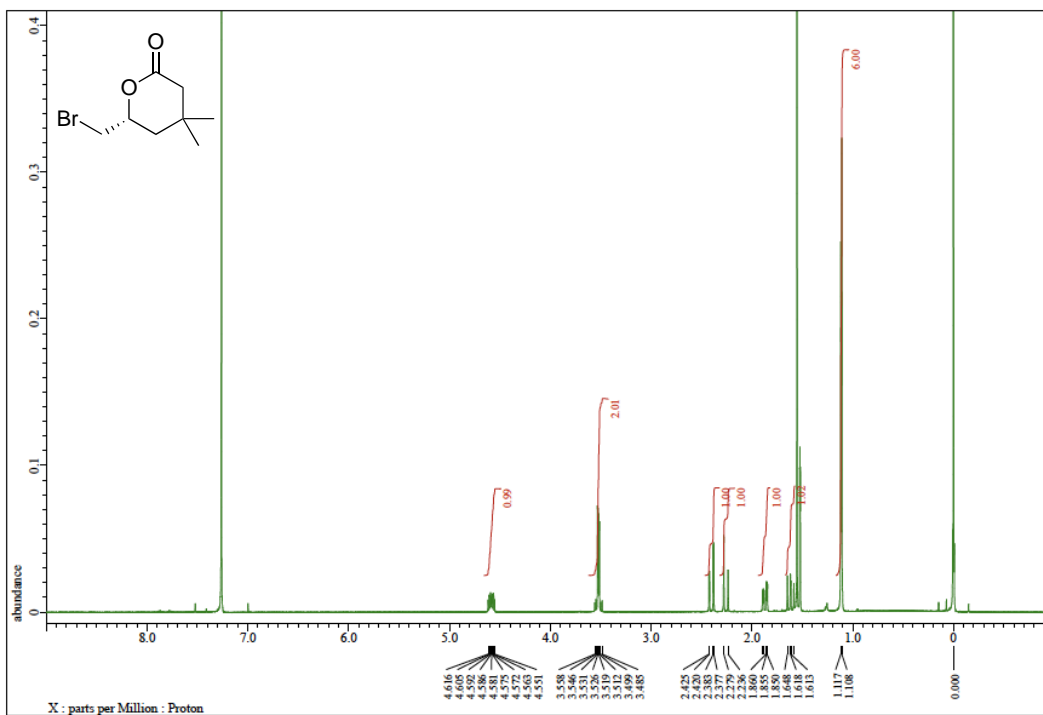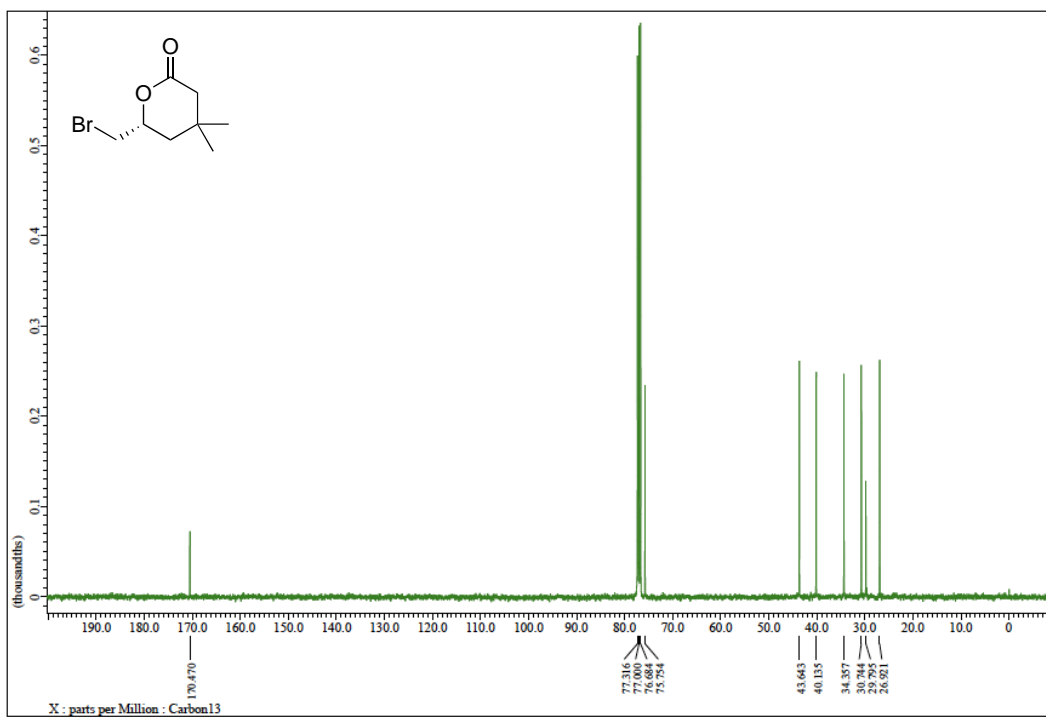



**3k:**  $^1\text{H}$  and  $^{13}\text{C}$  NMR

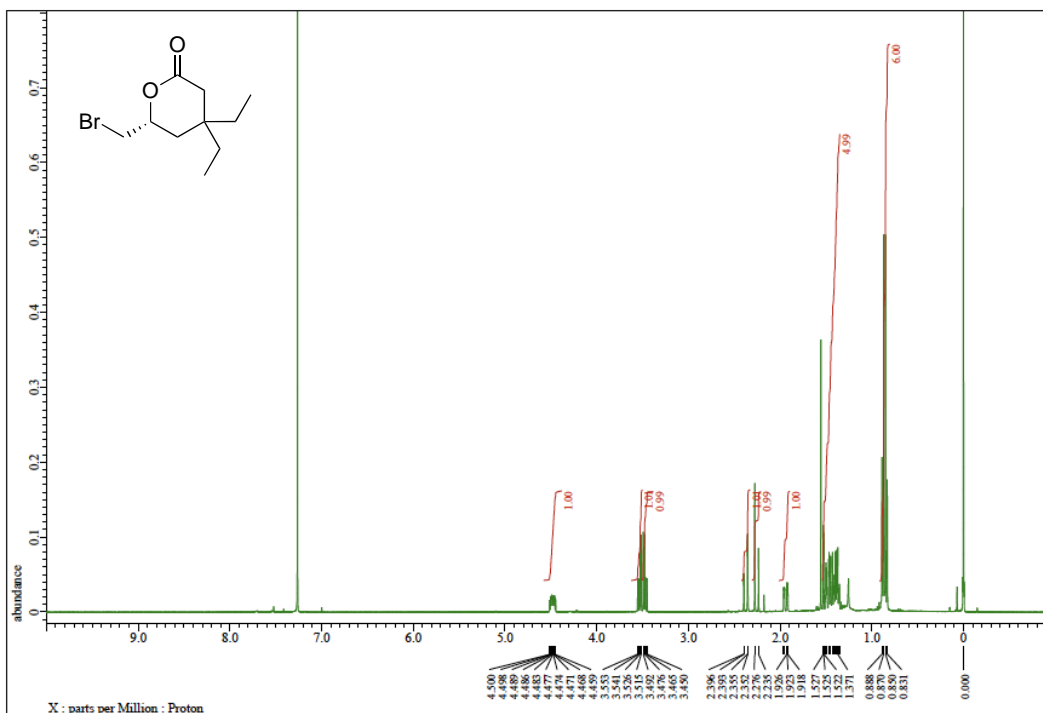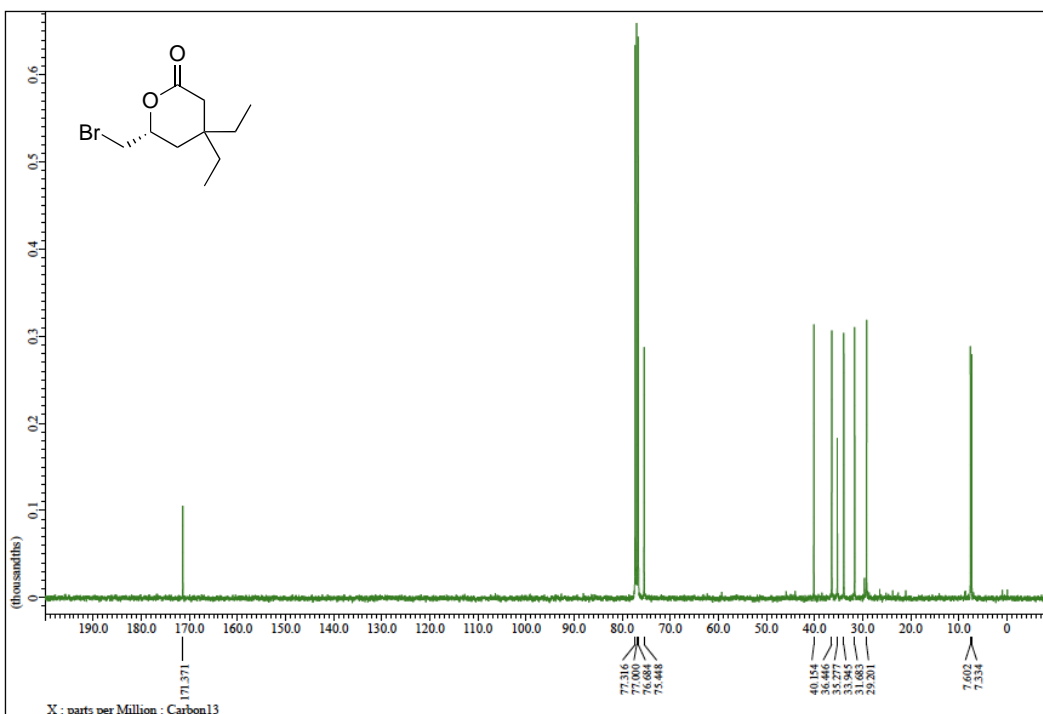

3l:  $^1\text{H}$  and  $^{13}\text{C}$  NMR

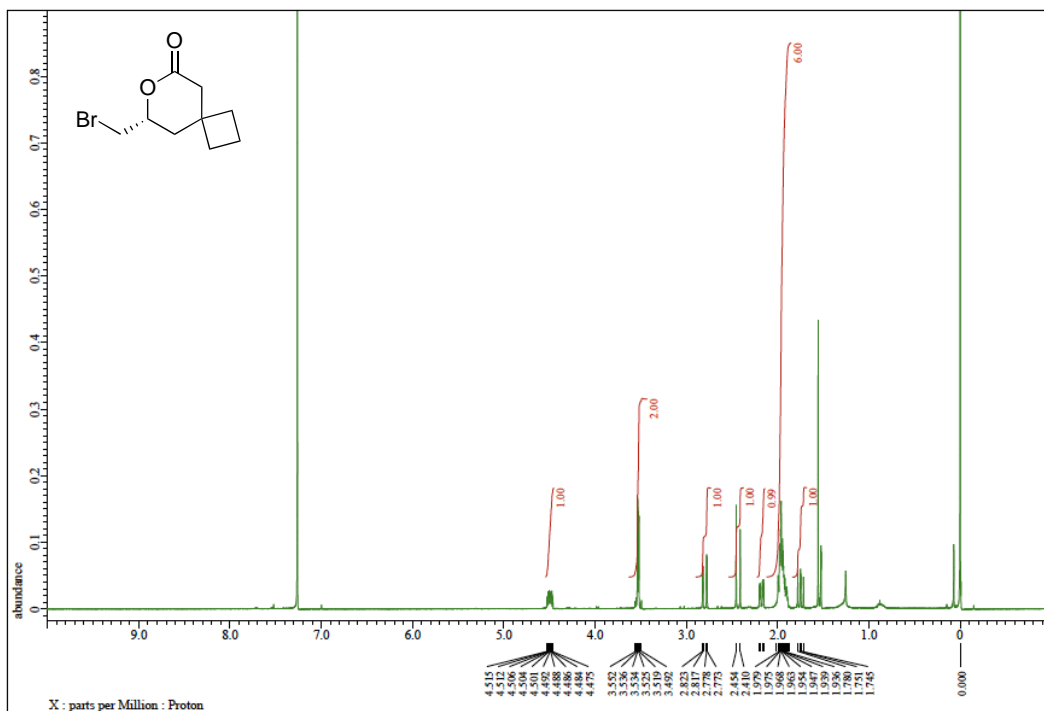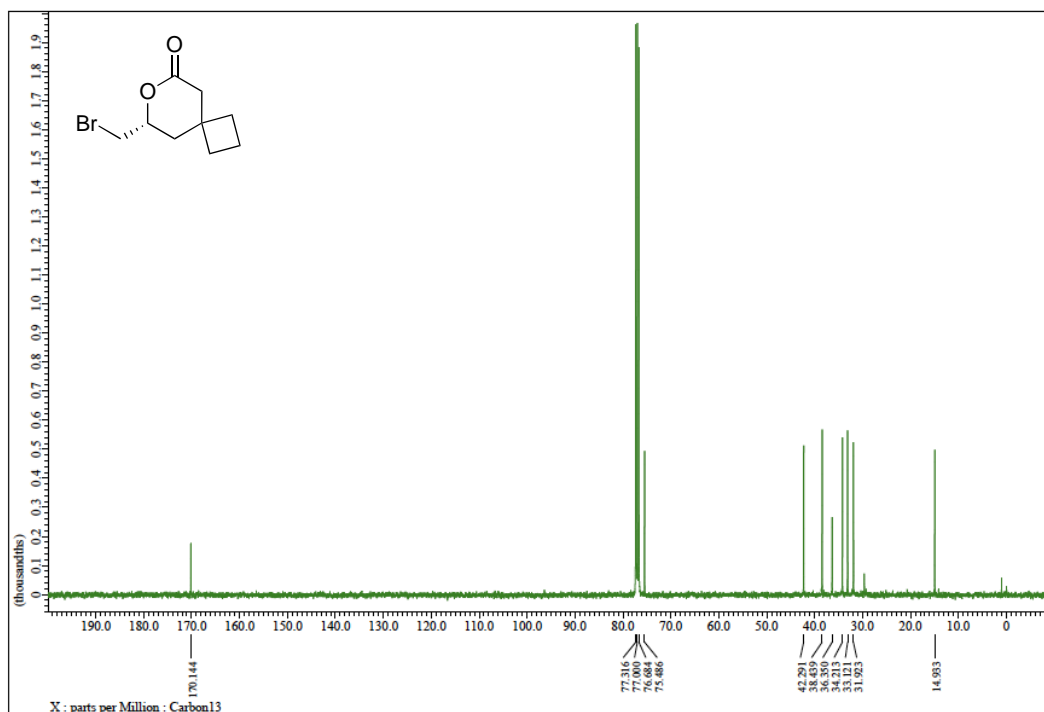

**3m:**  $^1\text{H}$  and  $^{13}\text{C}$  NMR

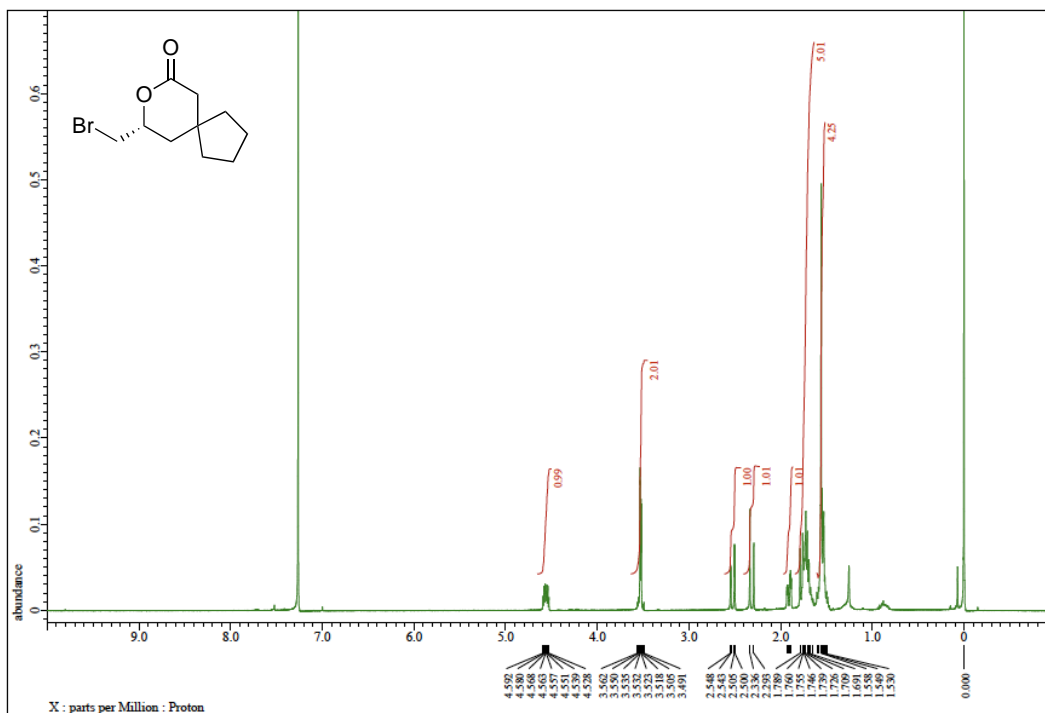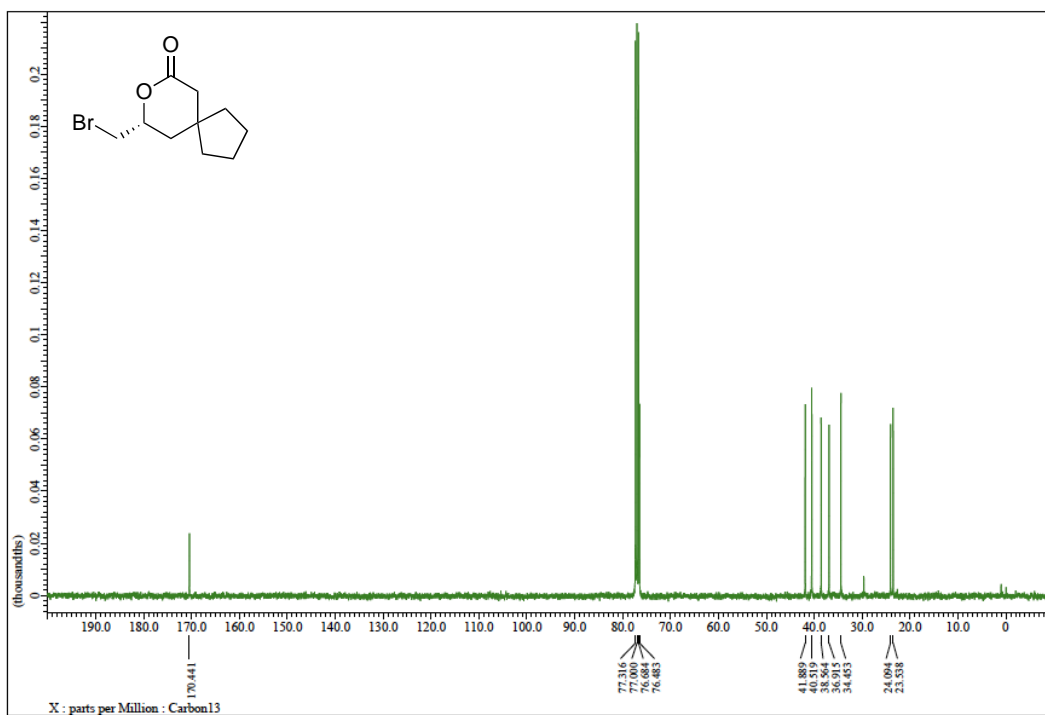

**3n:**  $^1\text{H}$  and  $^{13}\text{C}$  NMR

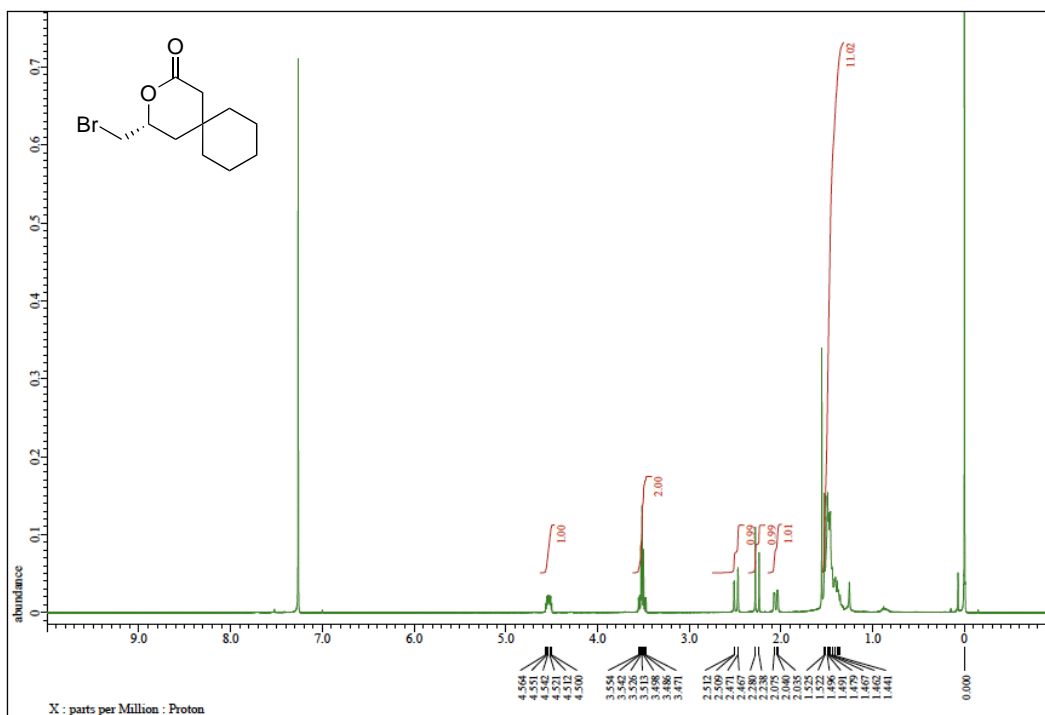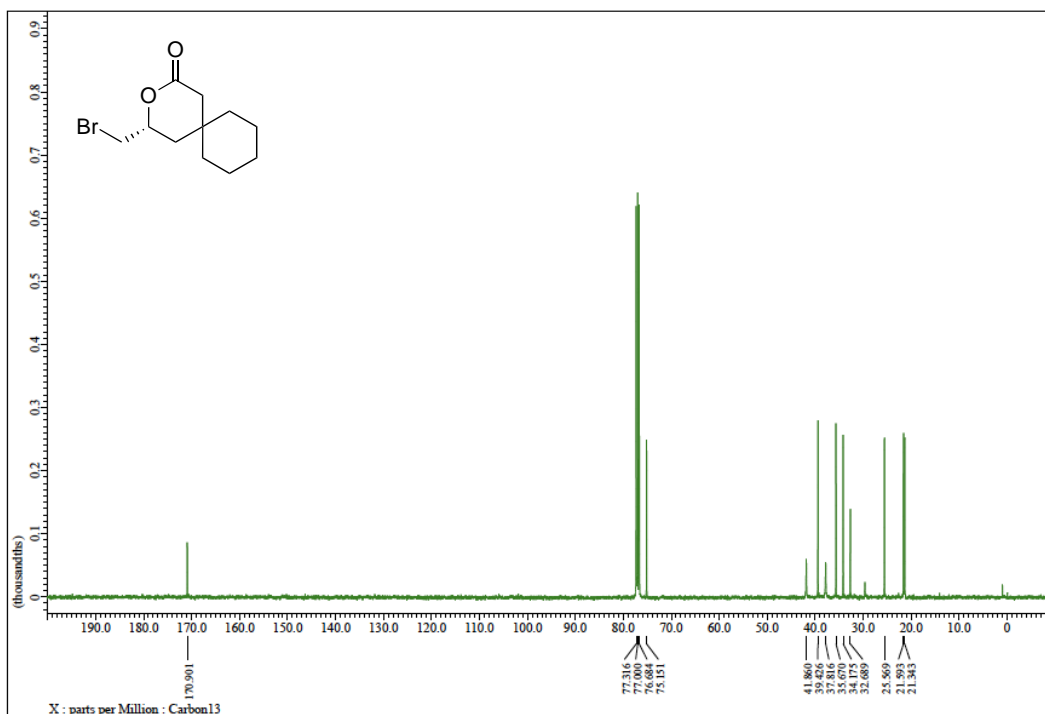

30:  $^1\text{H}$  and  $^{13}\text{C}$  NMR

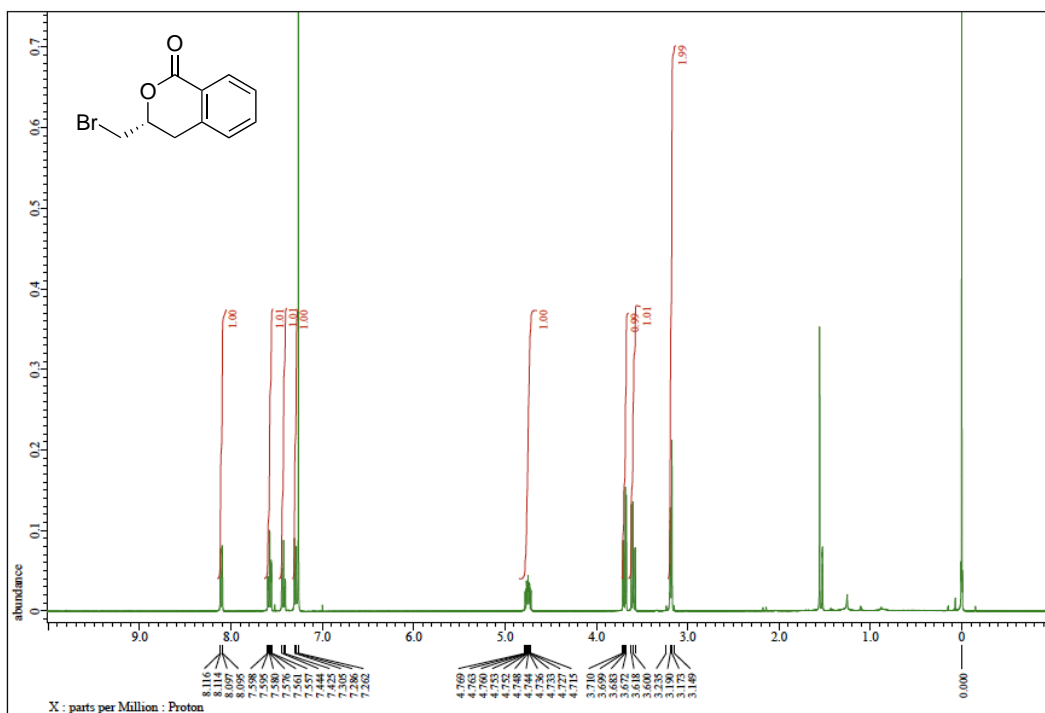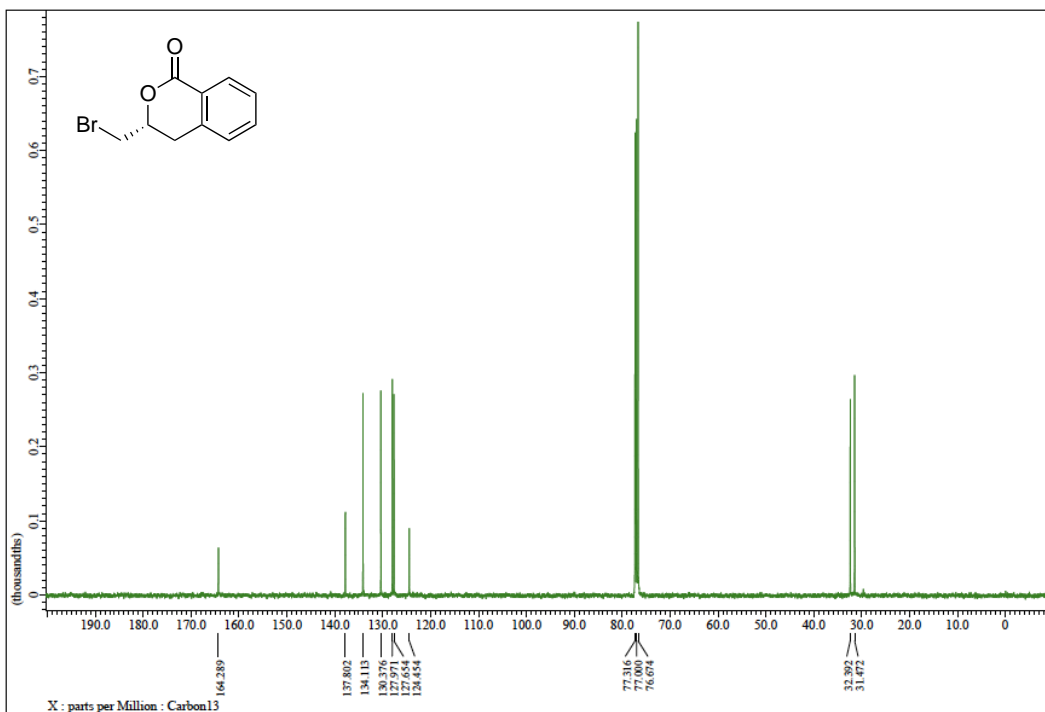

7:  $^1\text{H}$  and  $^{13}\text{C}$  NMR

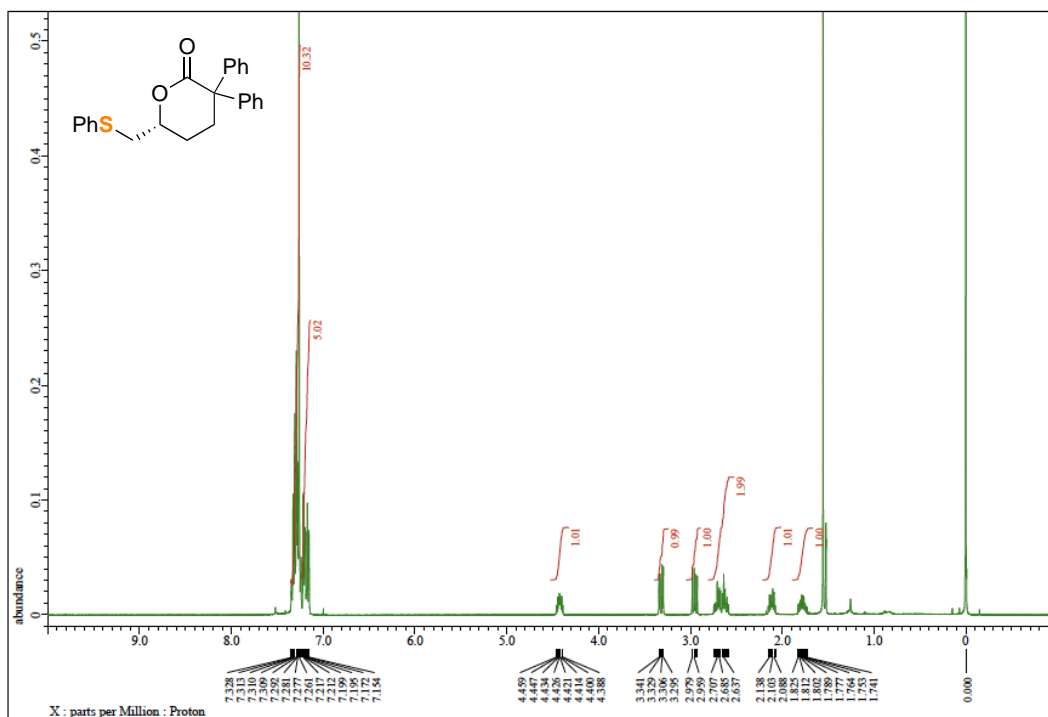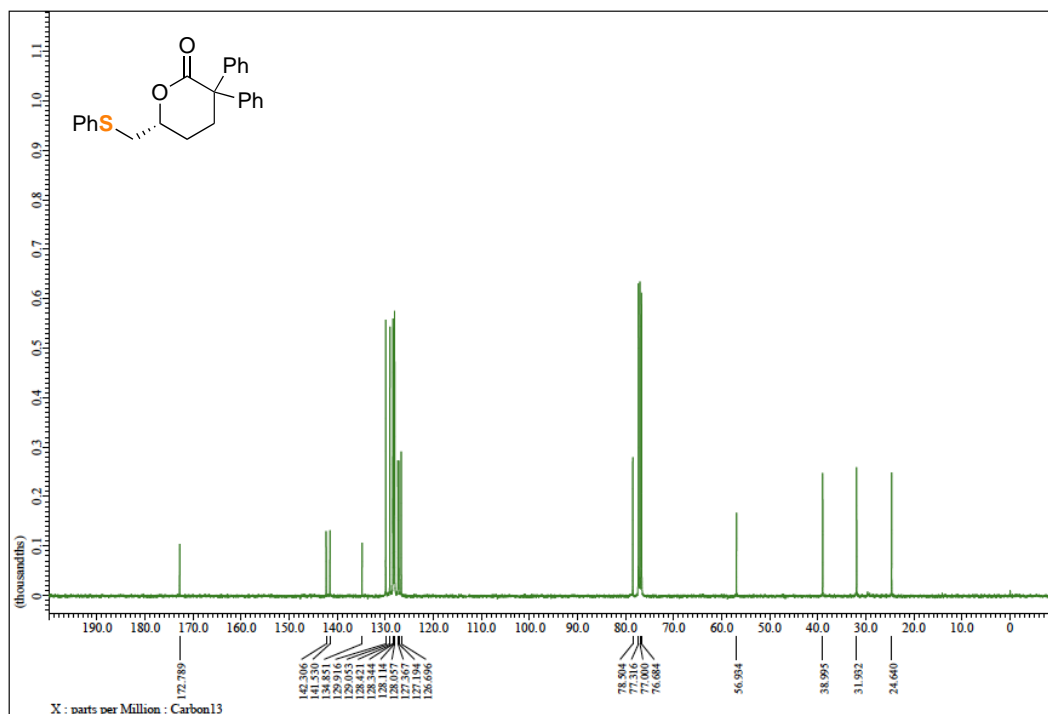

### 8: $^1\text{H}$ and $^{13}\text{C}$ NMR

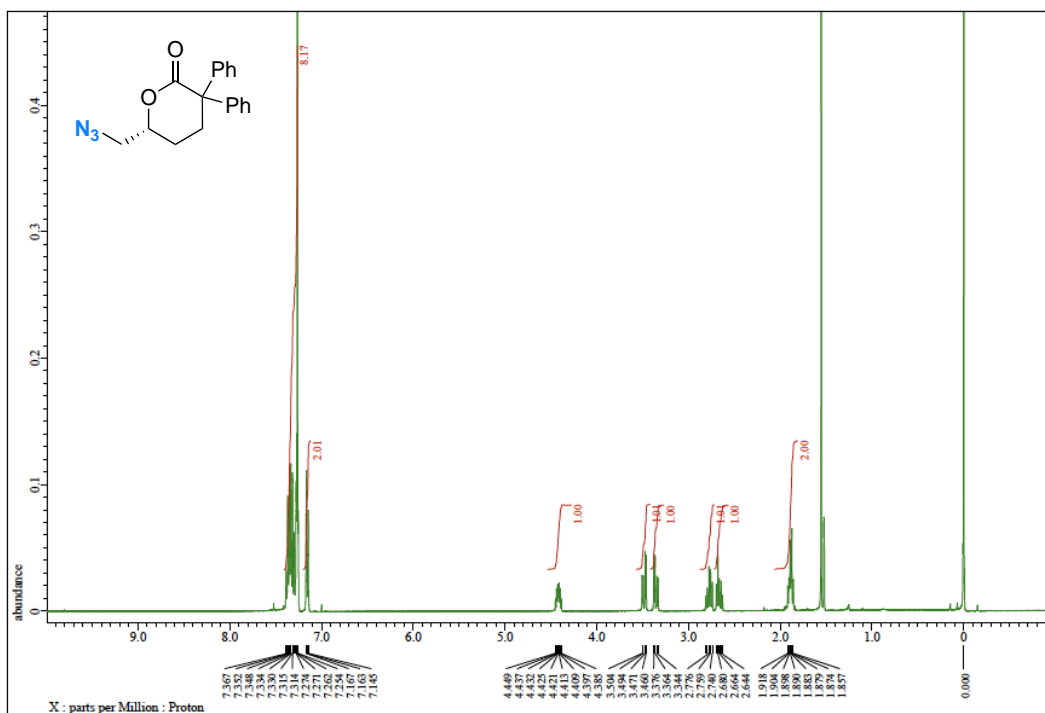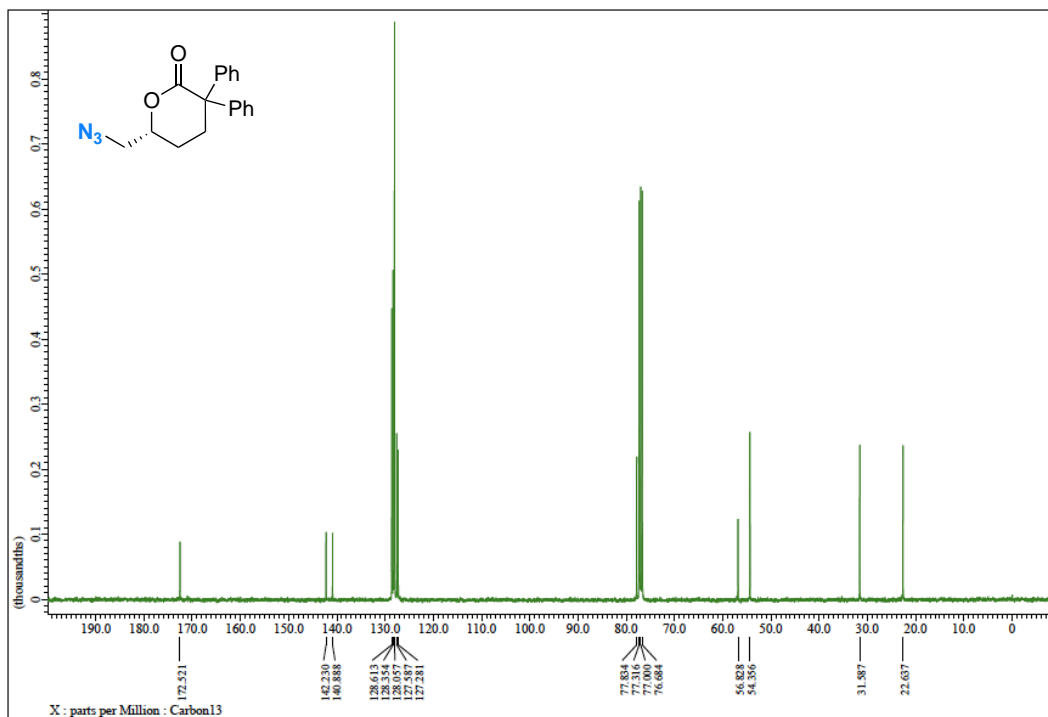

9:  $^1\text{H}$  and  $^{13}\text{C}$  NMR

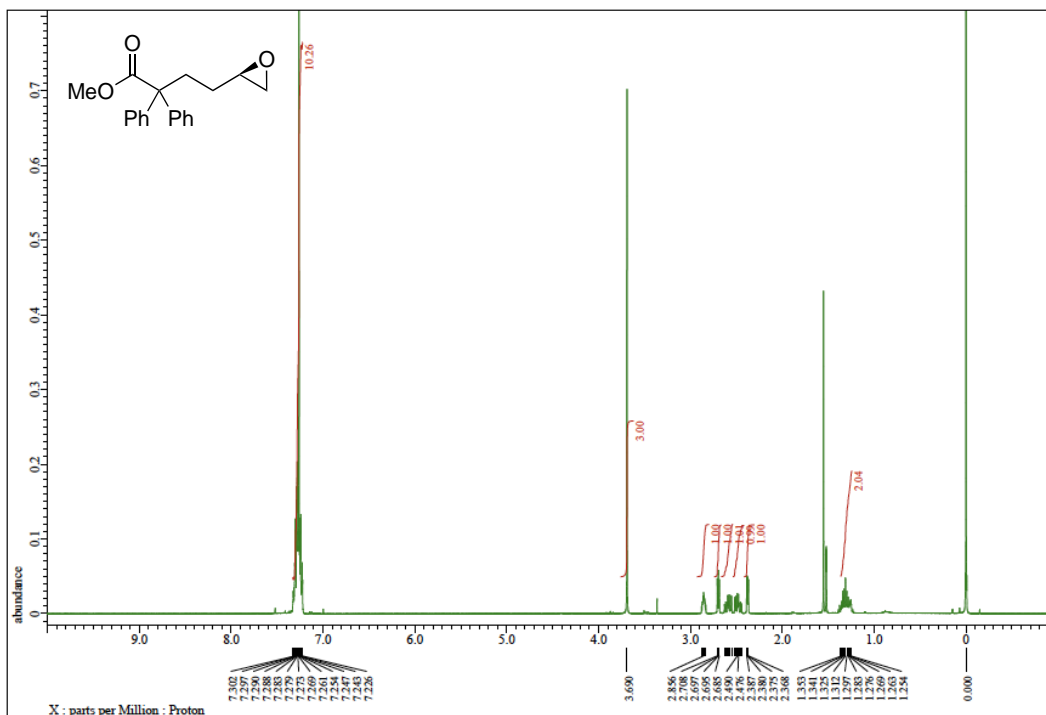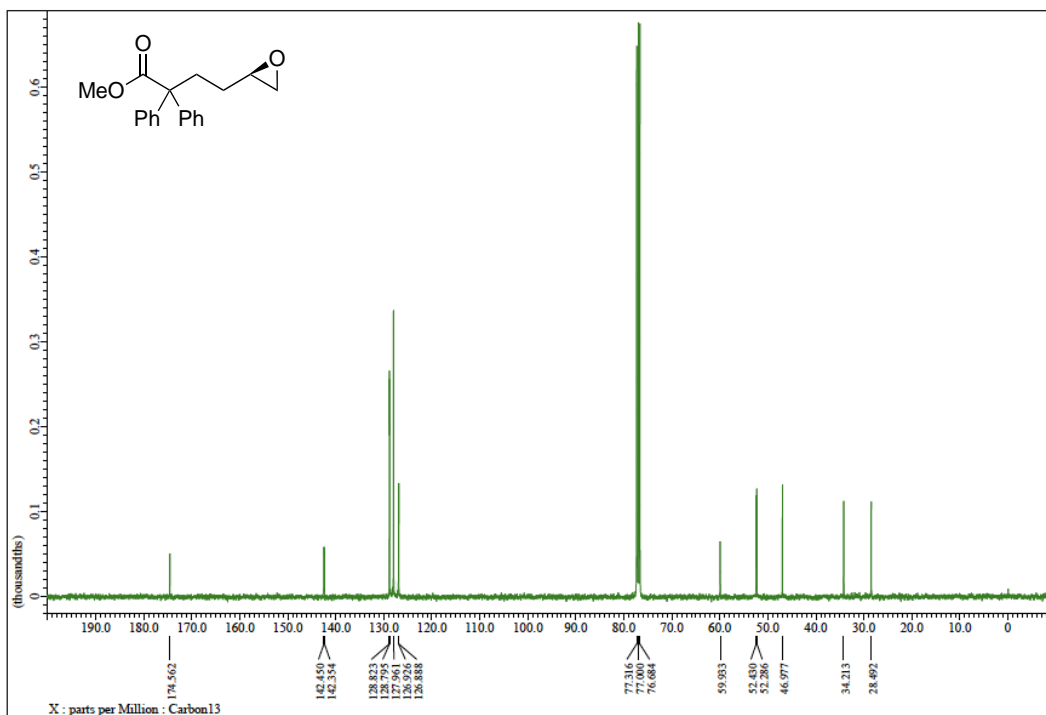



## HPLC Charts

3a: Daicel Chiralpak IE-3, hexane/2-propanol = 2:1, flow rate = 0.5 mL/min, 254 nm

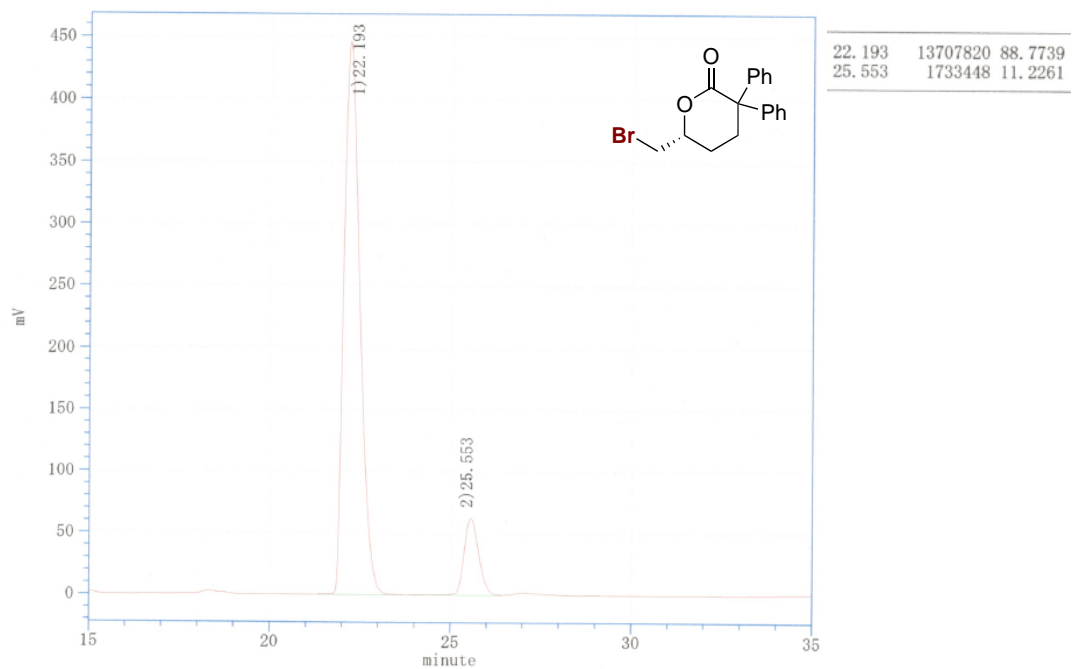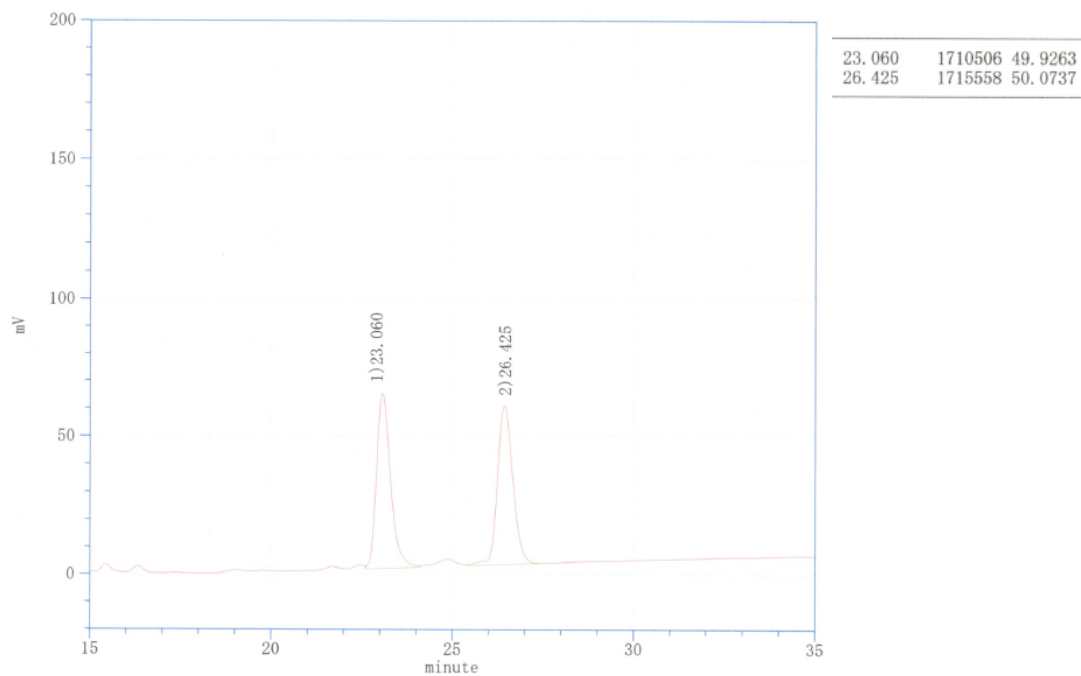

**Iodolactonization Product:** Daicel Chiralpak IE-3, hexane/2-propanol = 2:1, flow rate = 0.5 mL/min, 254 nm

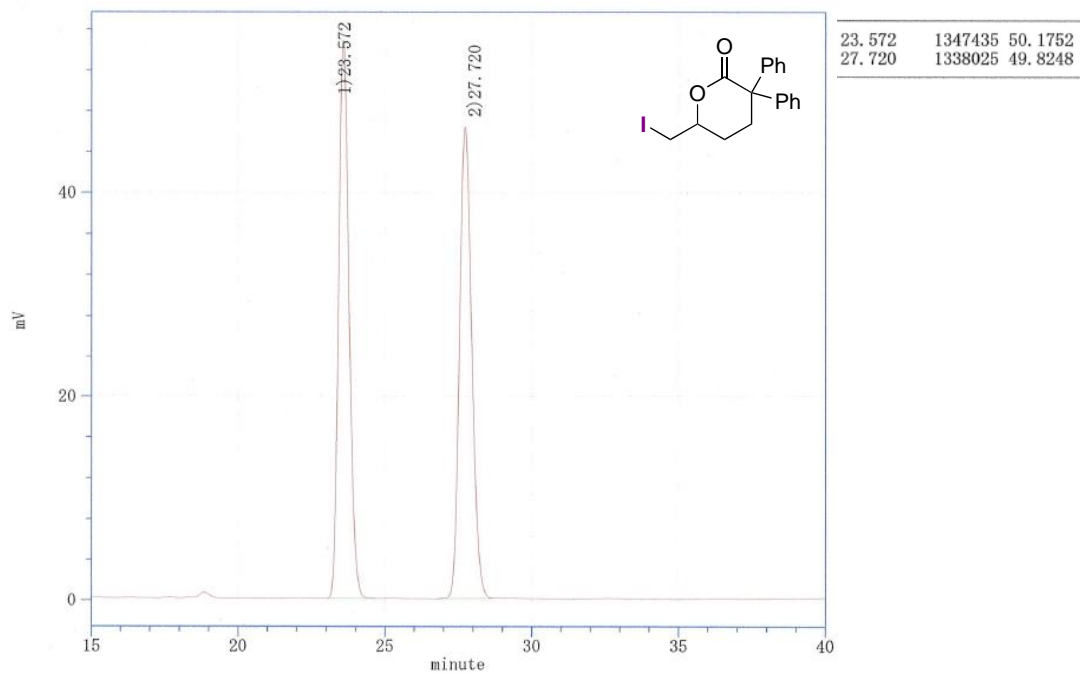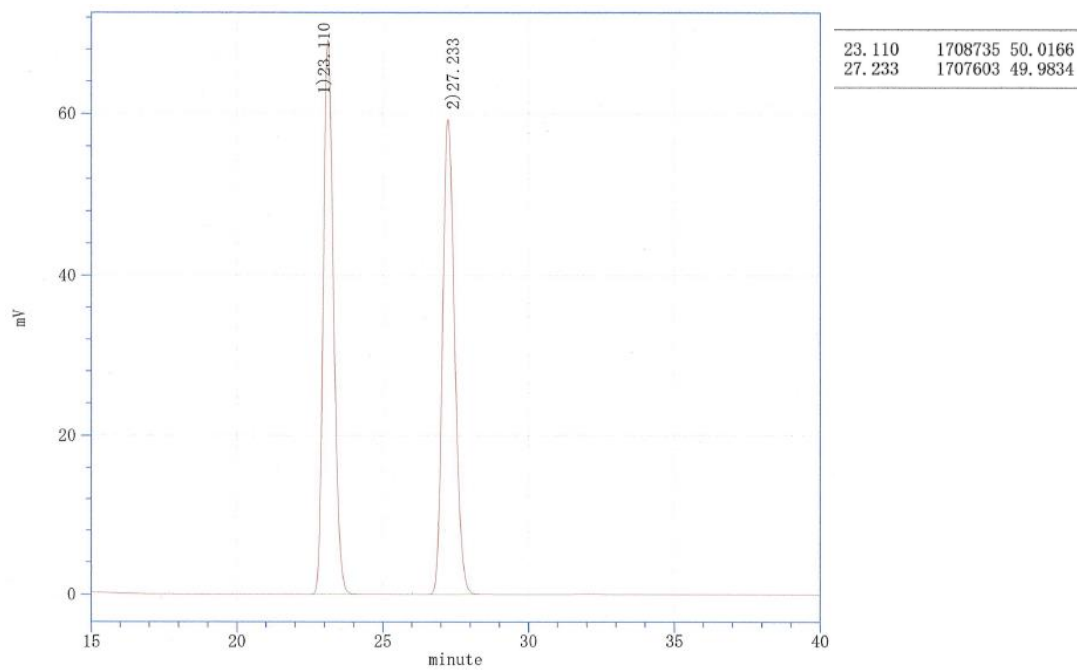

**3b:** Daicel Chiralpak IC-3, hexane/2-propanol = 2:1, flow rate = 0.5 mL/min, 254 nm

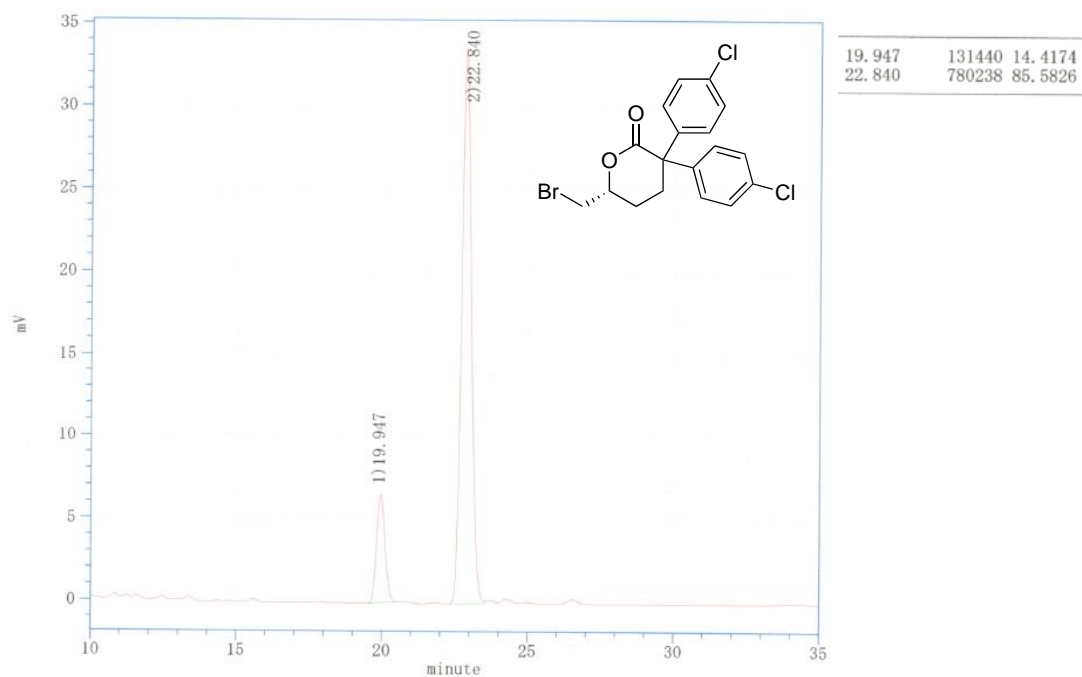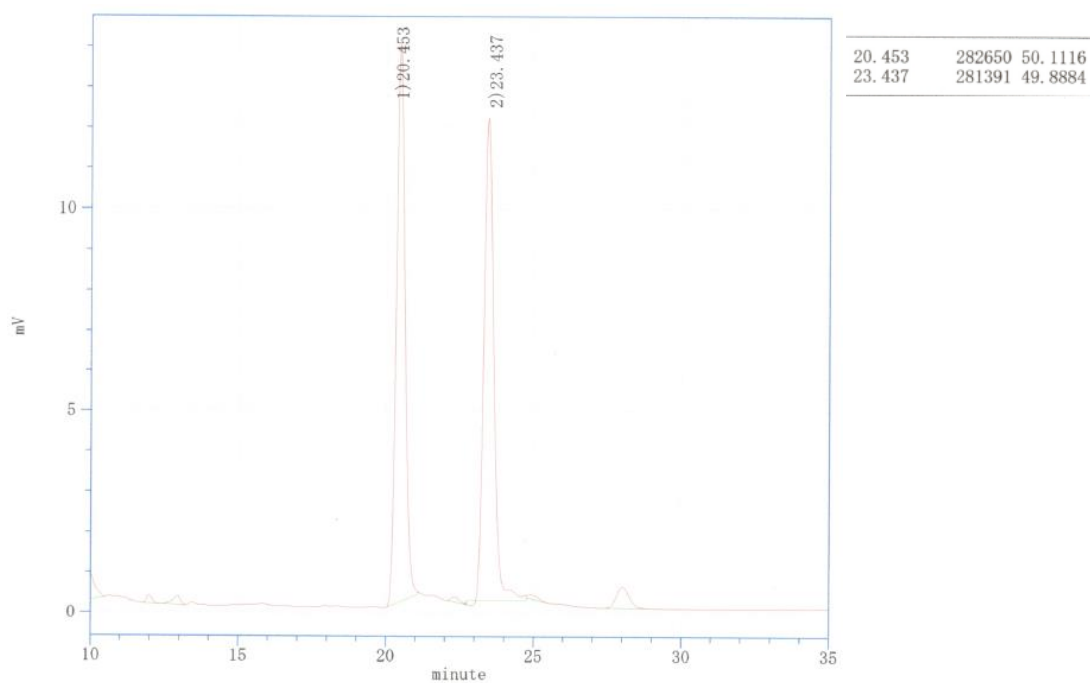

**3c:** Daicel Chiralpak IE-3, hexane/2-propanol = 2:1, flow rate = 0.5 mL/min, 254 nm

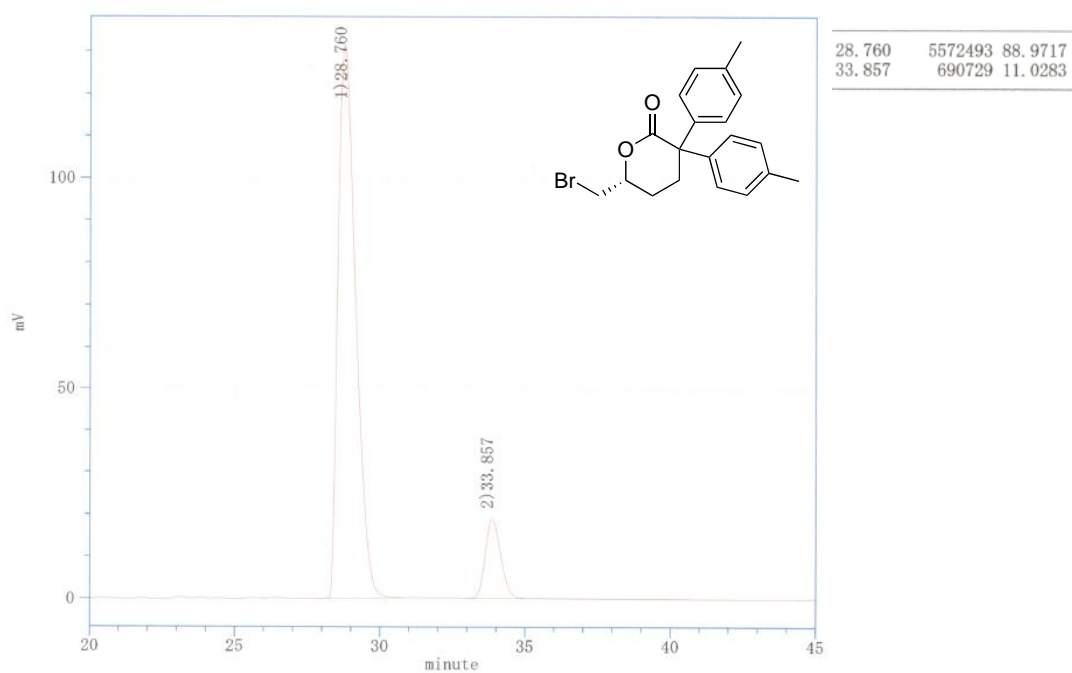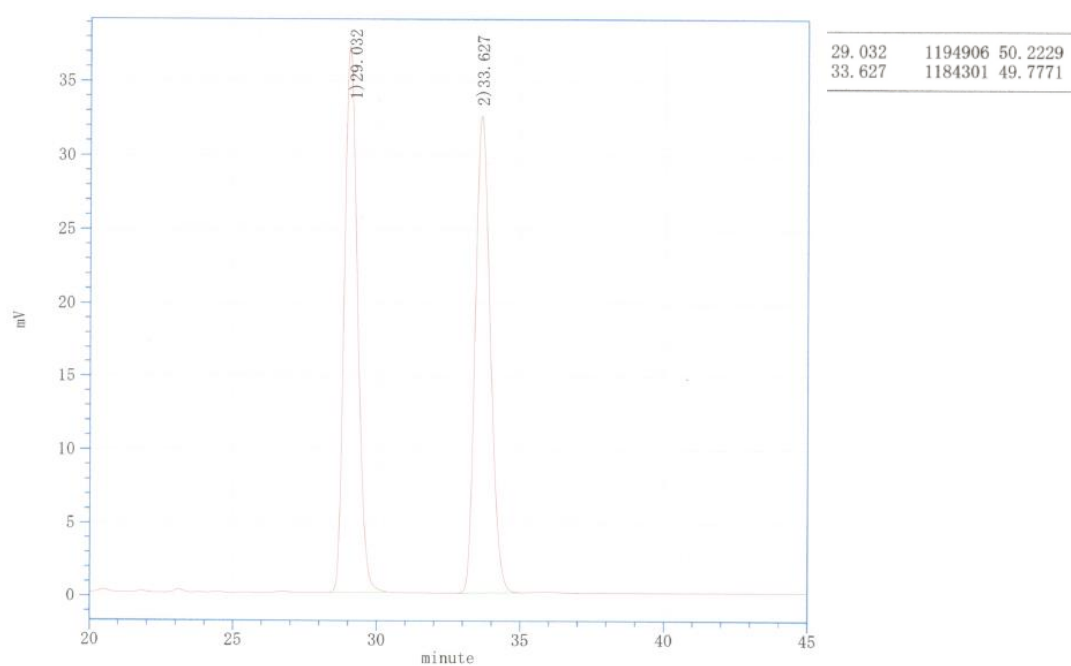

**3d**: Daicel Chiralpak IE-3, hexane/2-propanol = 5:1, flow rate = 0.5 mL/min, 254 nm

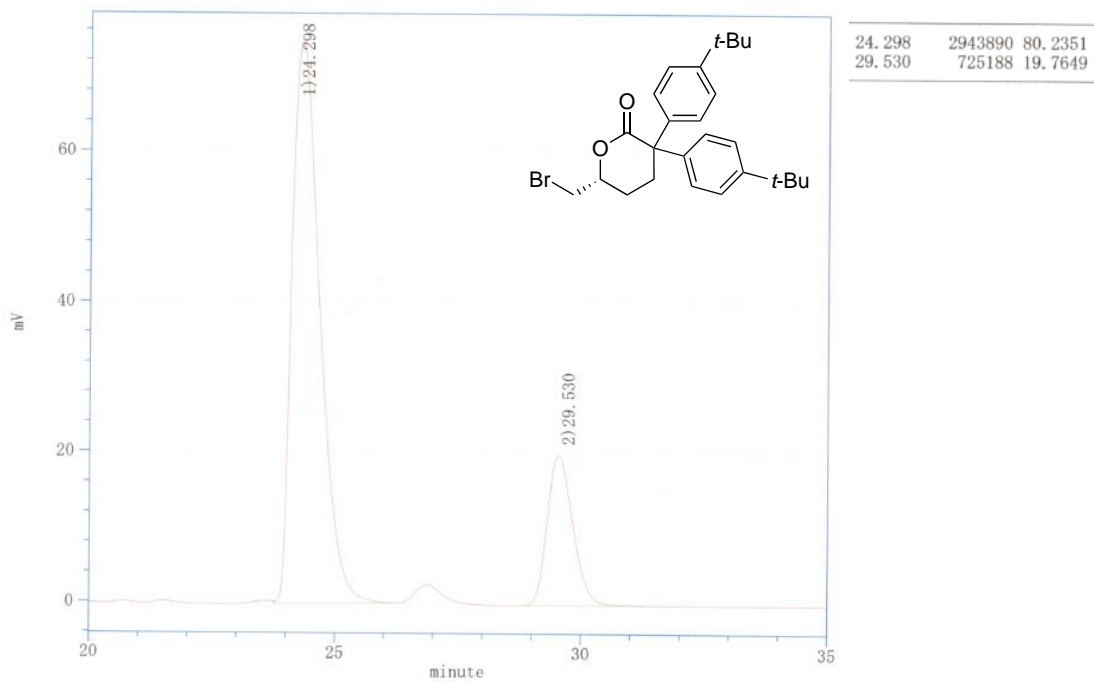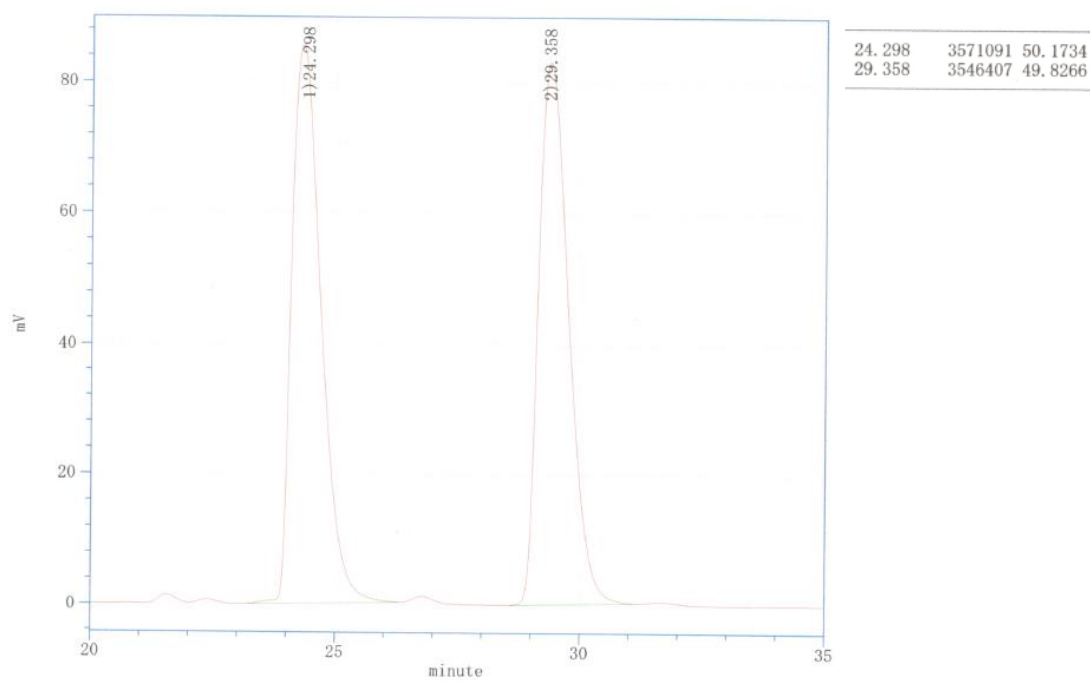

**3e:** Daicel Chiralpak IC-3, hexane/2-propanol = 3:1, flow rate = 0.5 mL/min, 214 nm

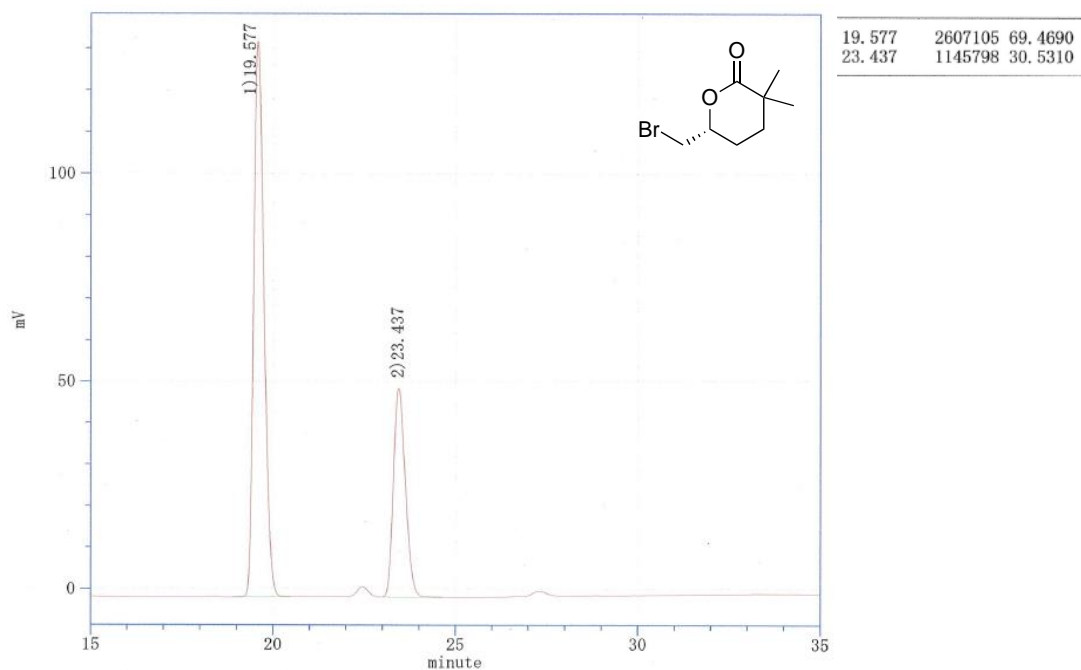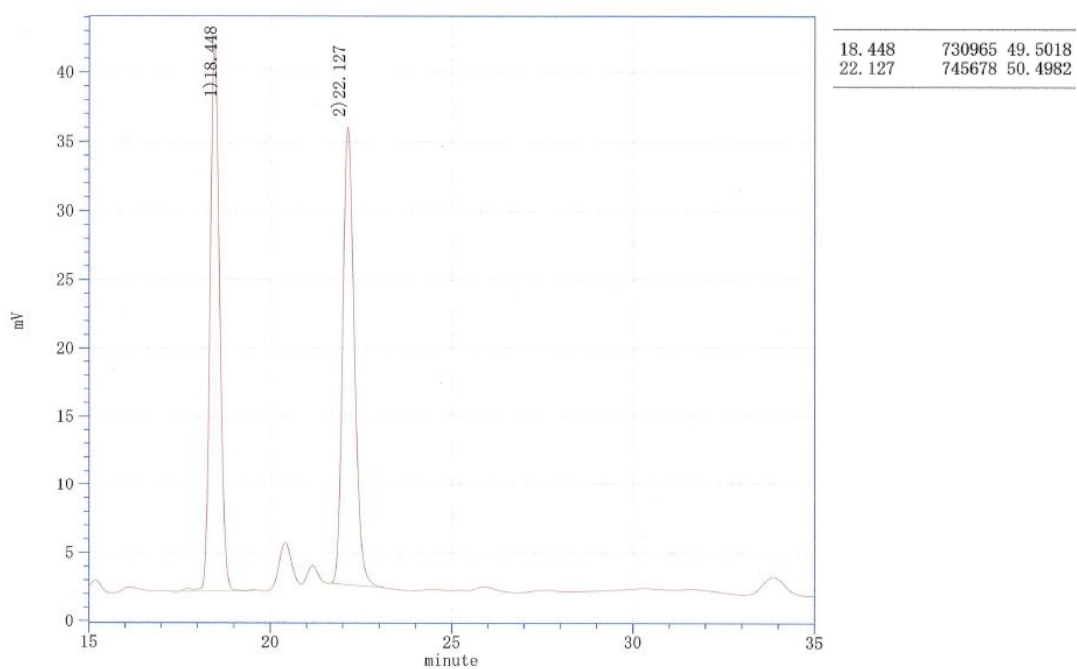

3f: Daicel Chiralpak IC-3, hexane/2-propanol = 10:1, flow rate = 0.5 mL/min, 214 nm

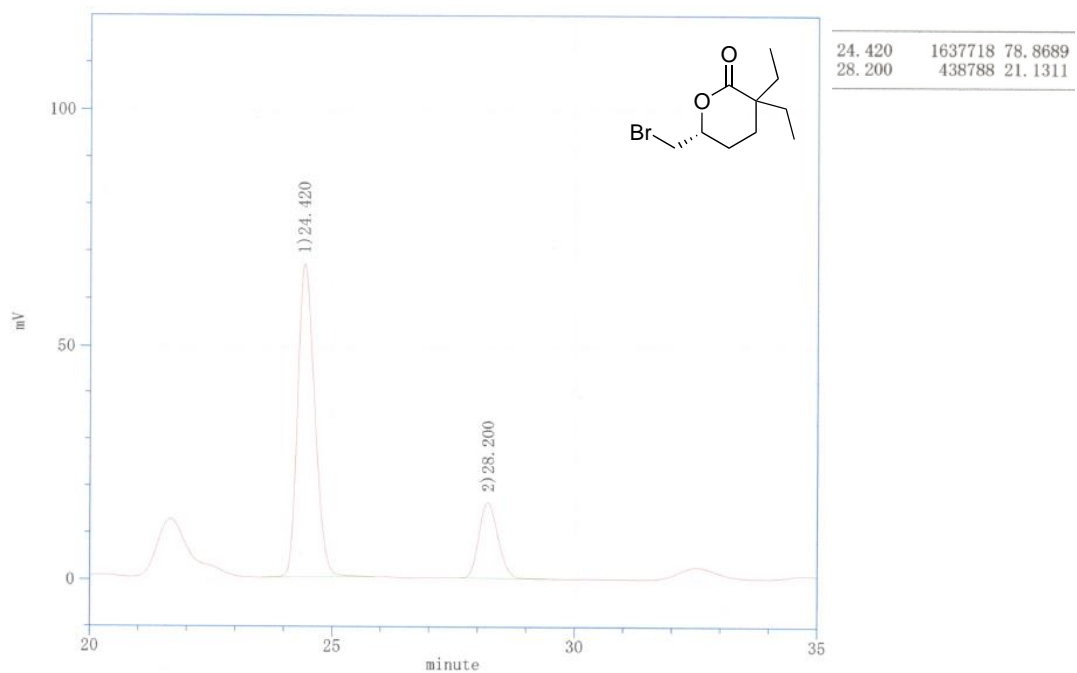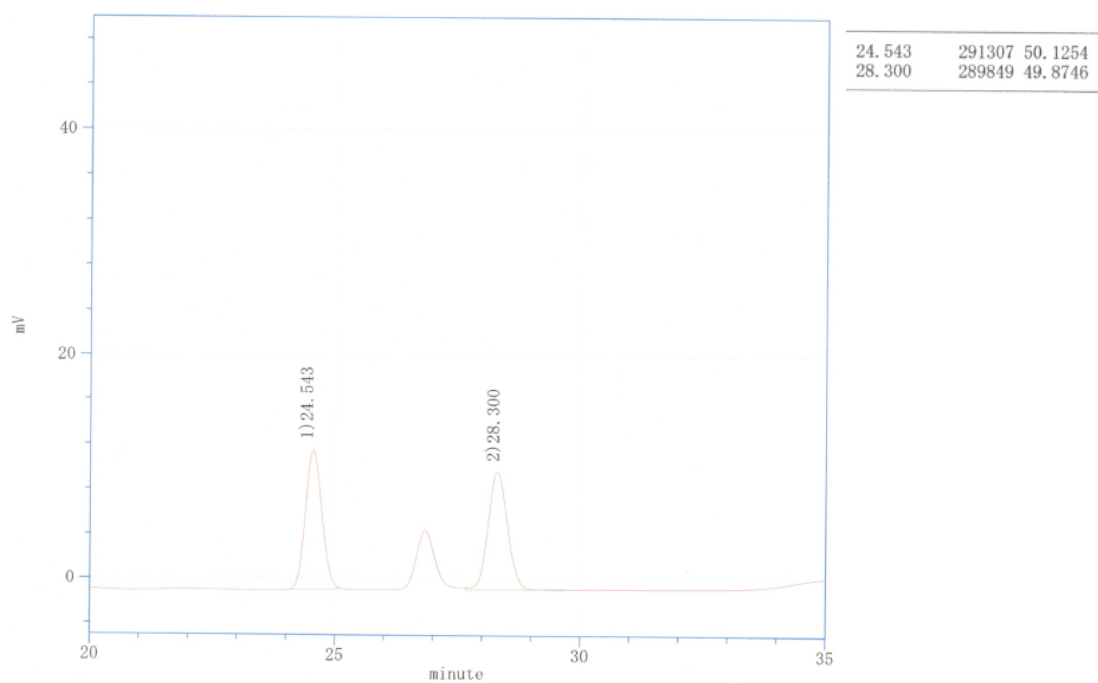

**3g**: Daicel Chiralpak IC-3, hexane/2-propanol = 10:1, flow rate = 0.5 mL/min, 254 nm

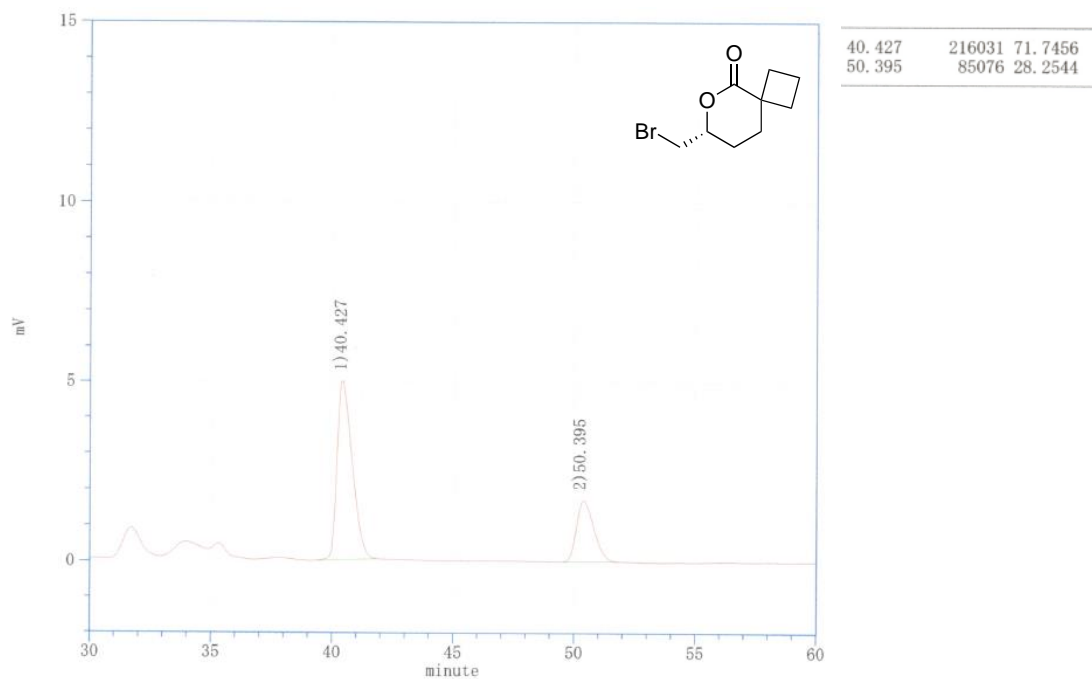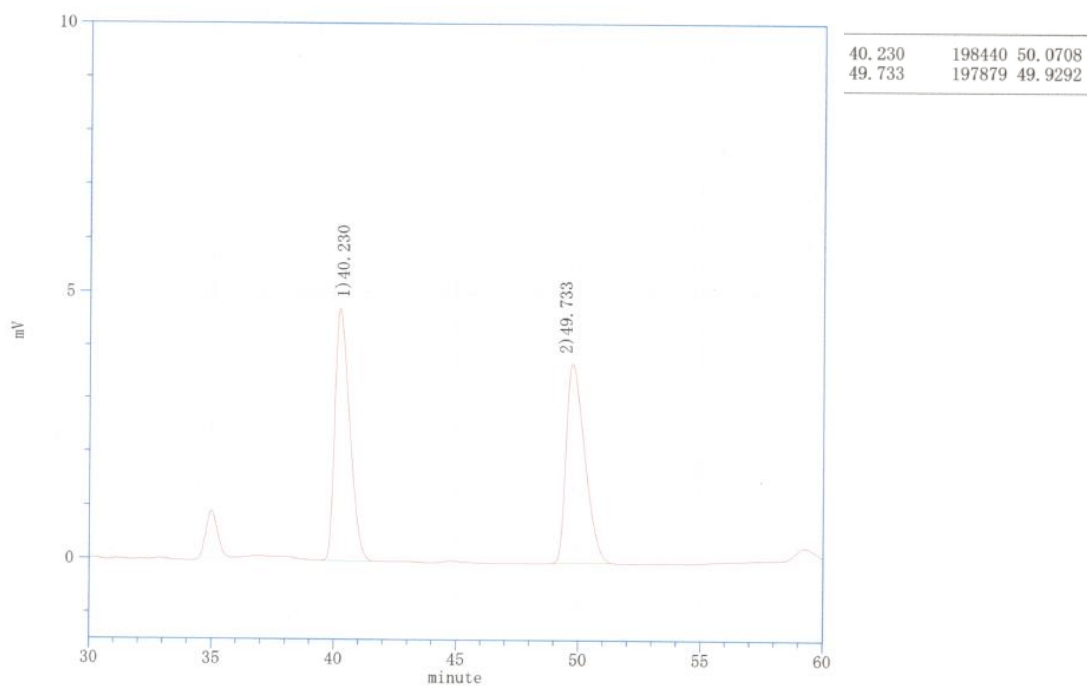



**3h:** Daicel Chiralpak IE-3, hexane/2-propanol = 2:1, flow rate = 0.5 mL/min, 254 nm

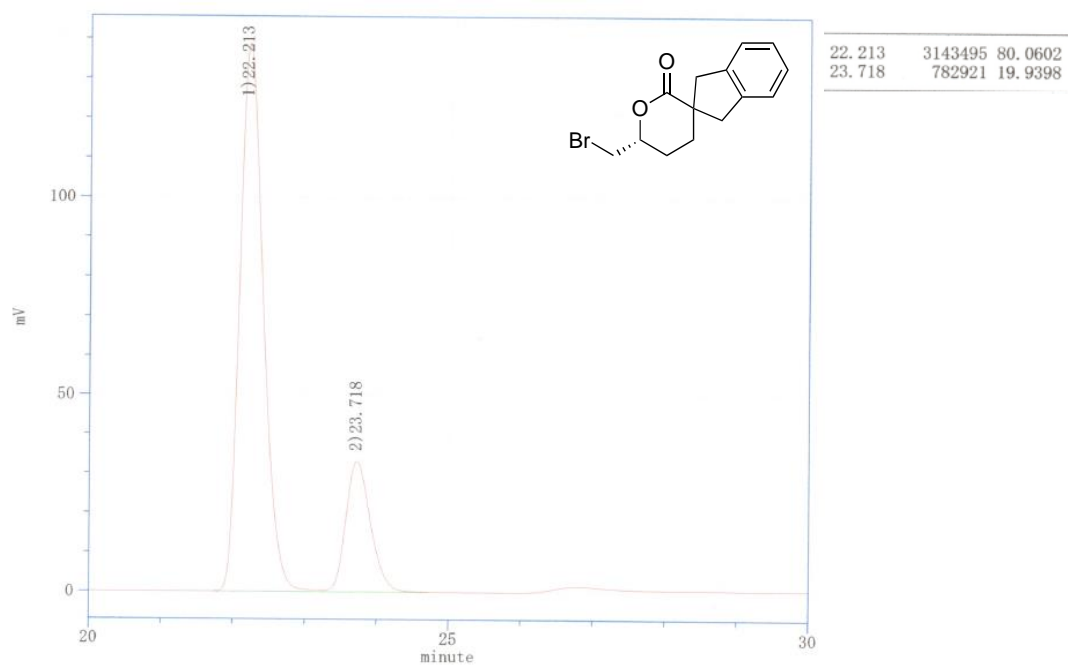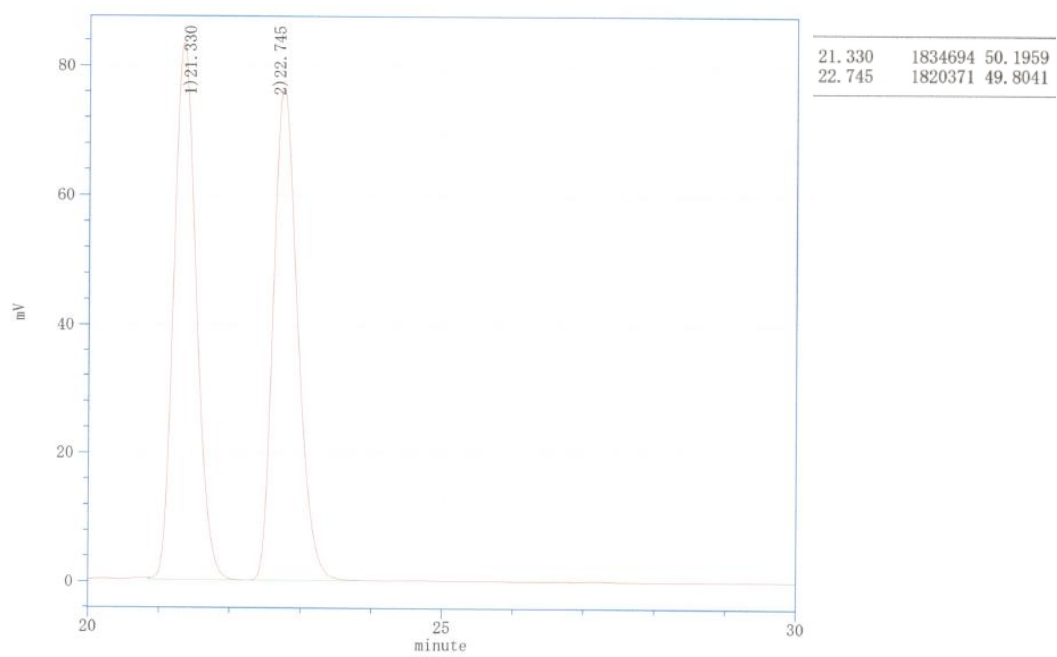

3i: Daicel Chiralpak IE-3, hexane/2-propanol = 5:1, flow rate = 0.5 mL/min, 214 nm

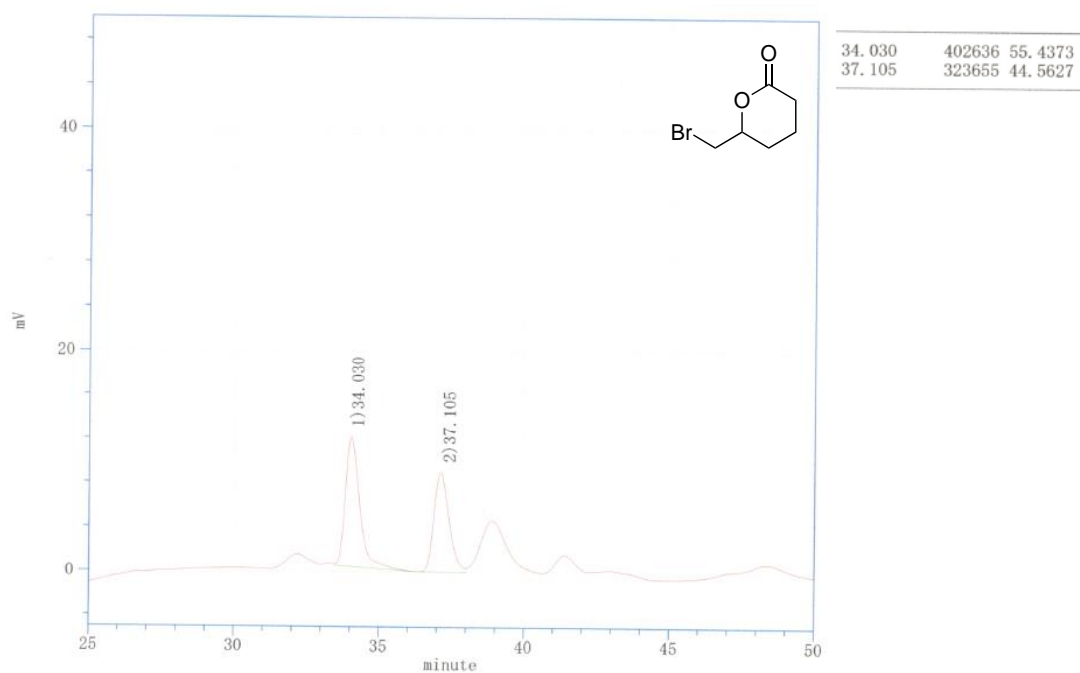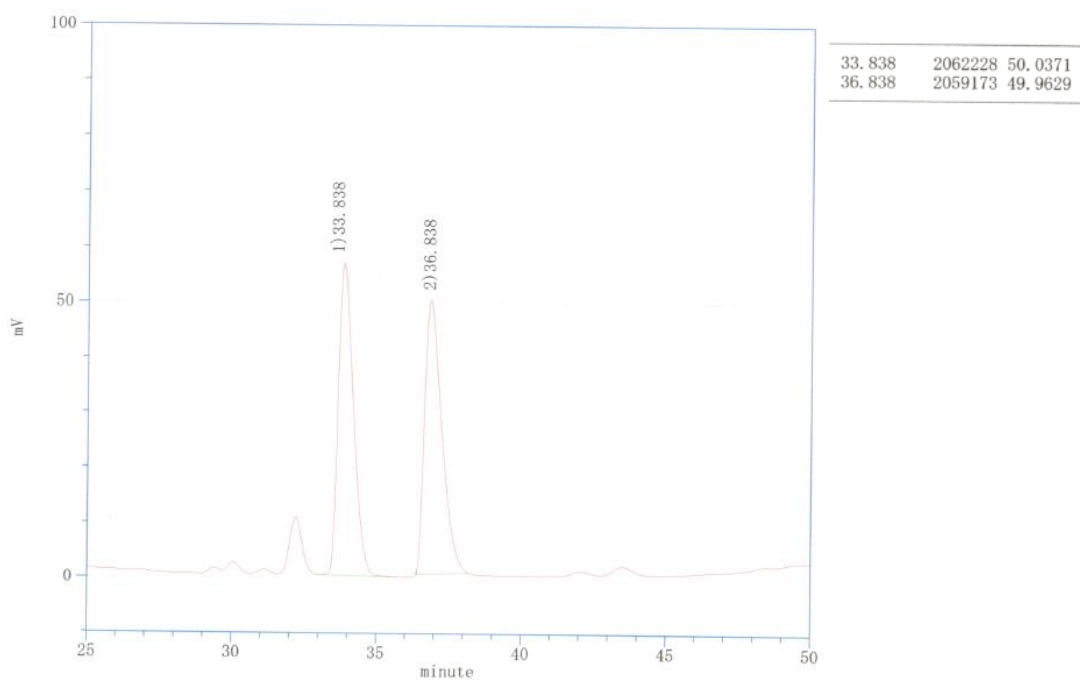

3j: Daicel Chiralpak IE-3, hexane/2-propanol = 5:1, flow rate = 0.5 mL/min, 214 nm

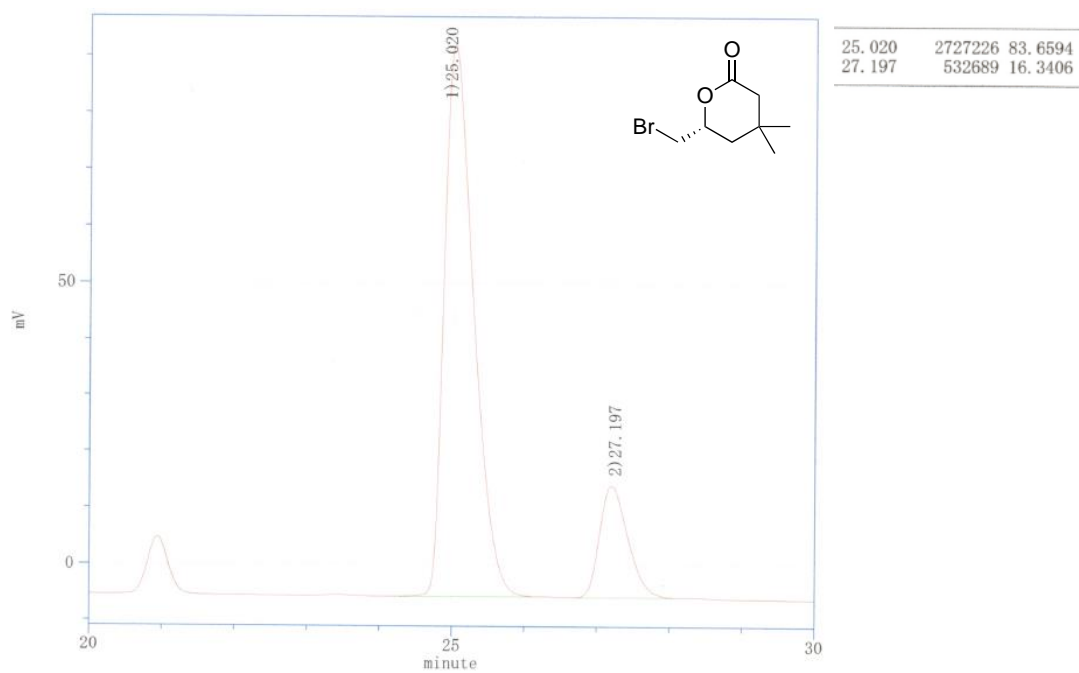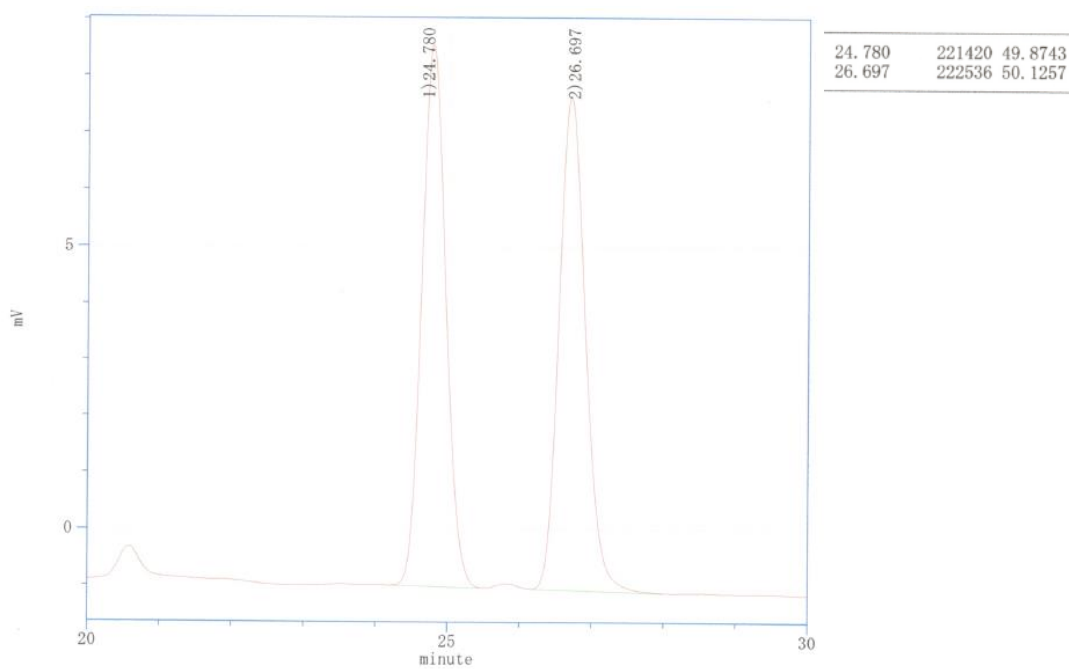

**3k:** Daicel Chiralpak IG-3, hexane/2-propanol = 5:1, flow rate = 0.5 mL/min, 214 nm

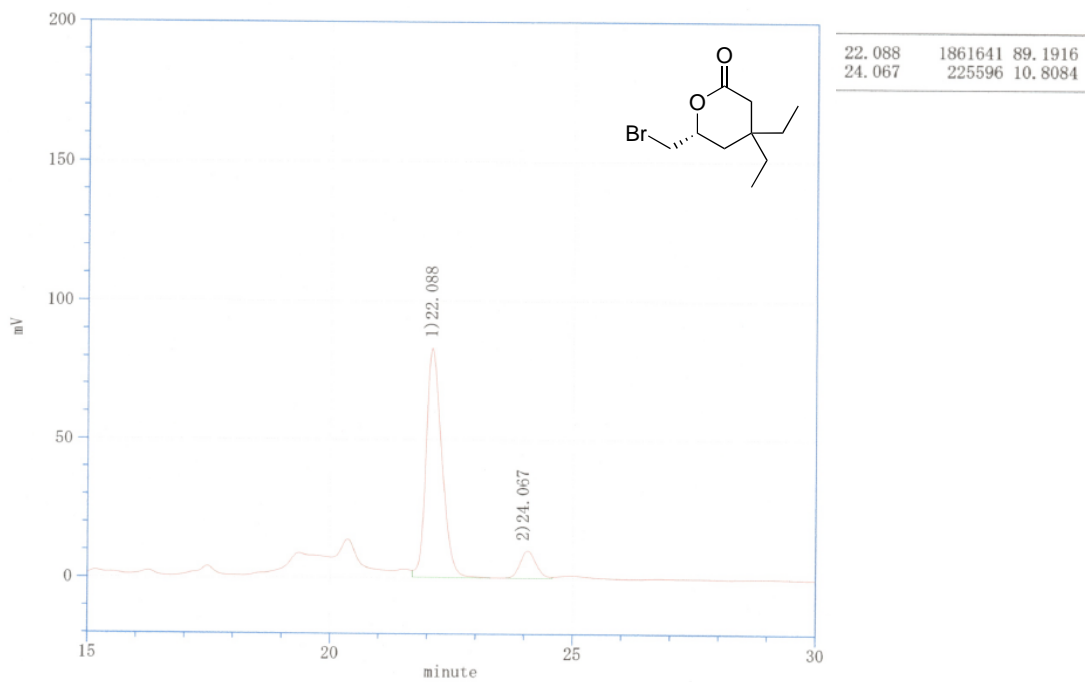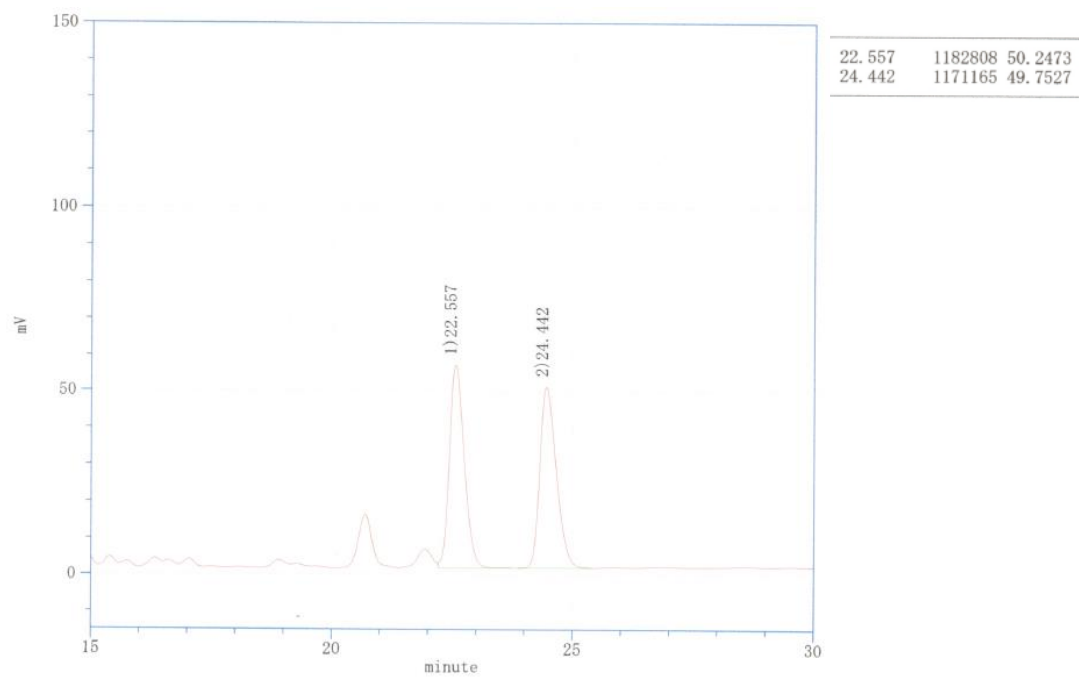

3I: Daicel Chiralpak IE-3, hexane/2-propanol = 5:1, flow rate = 0.5 mL/min, 214 nm

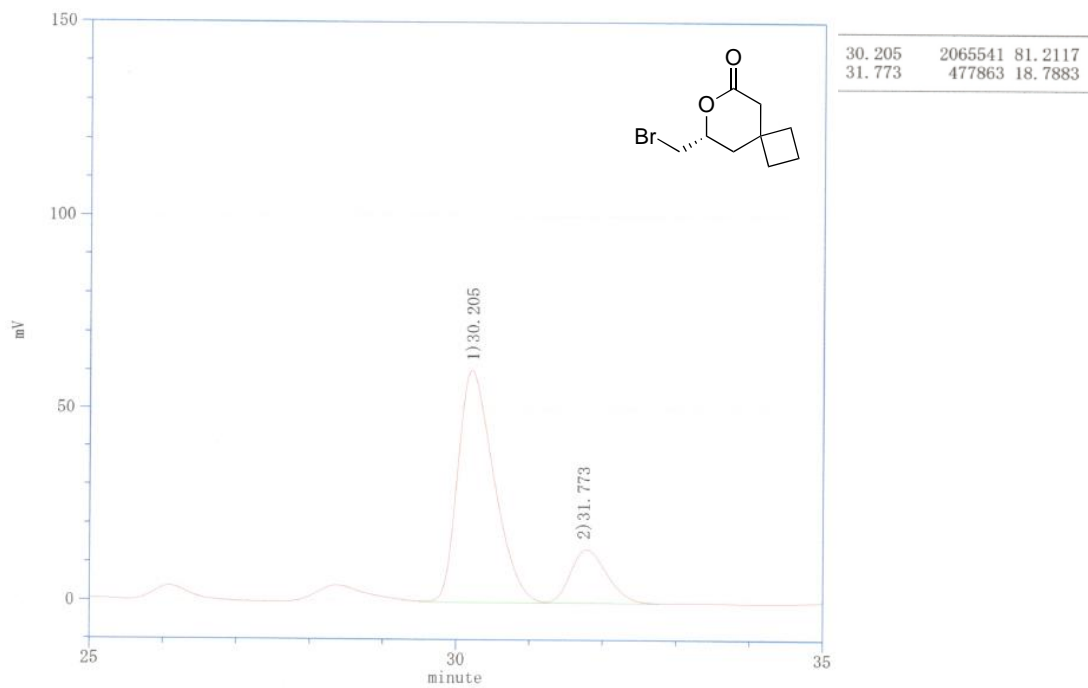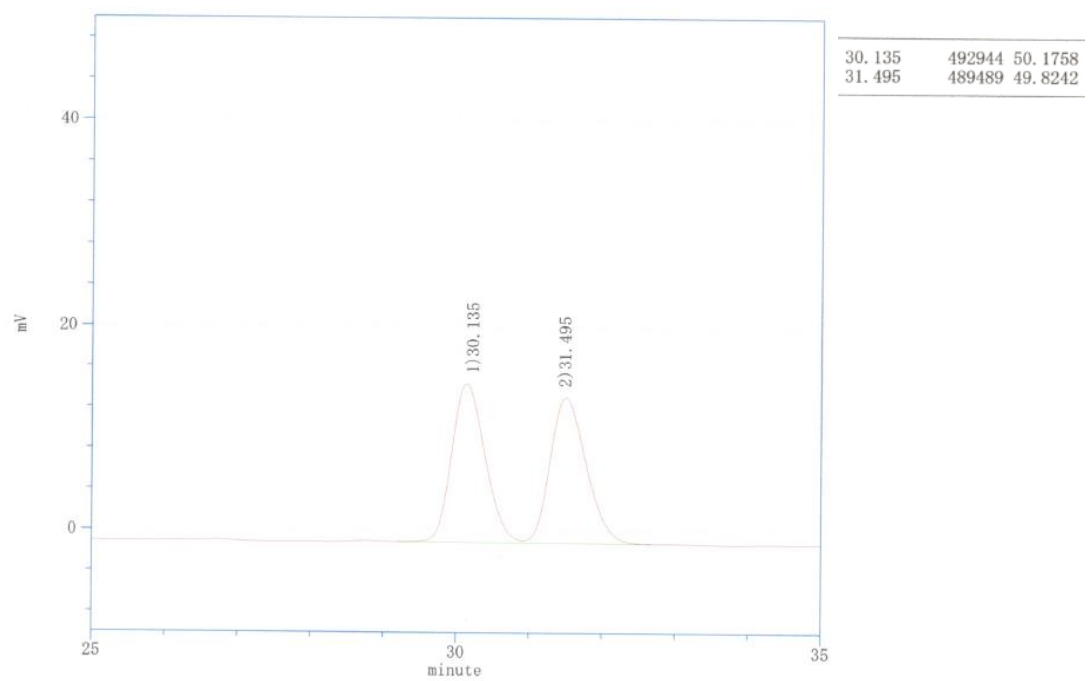

**3m:** Daicel Chiralpak IG-3, hexane/2-propanol = 5:1, flow rate = 0.5 mL/min, 214 nm

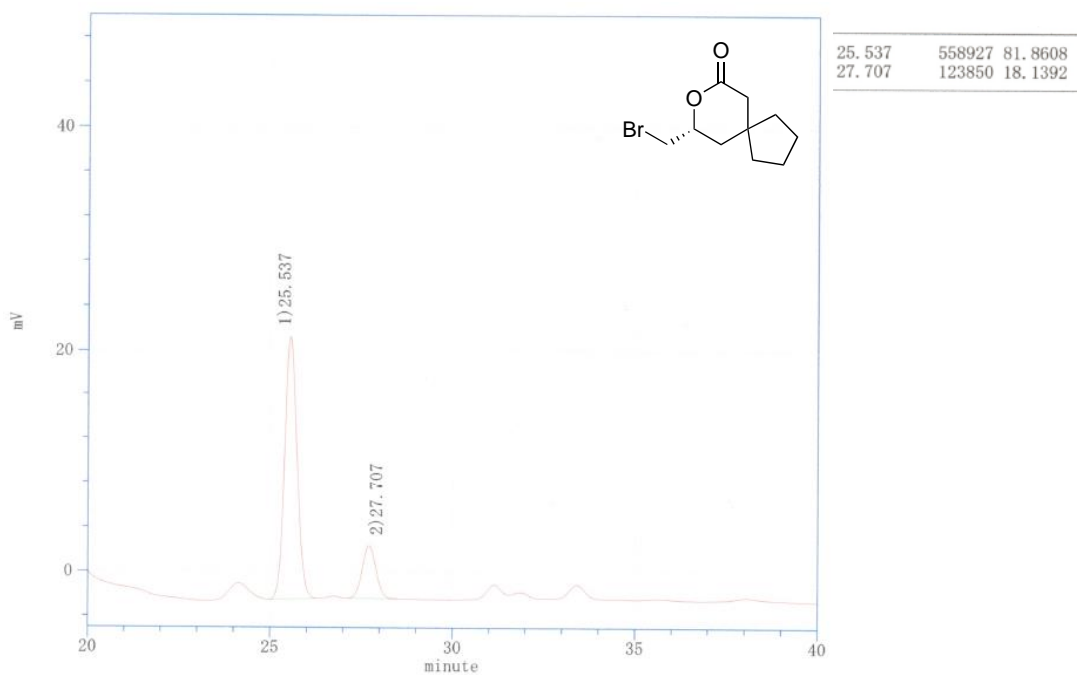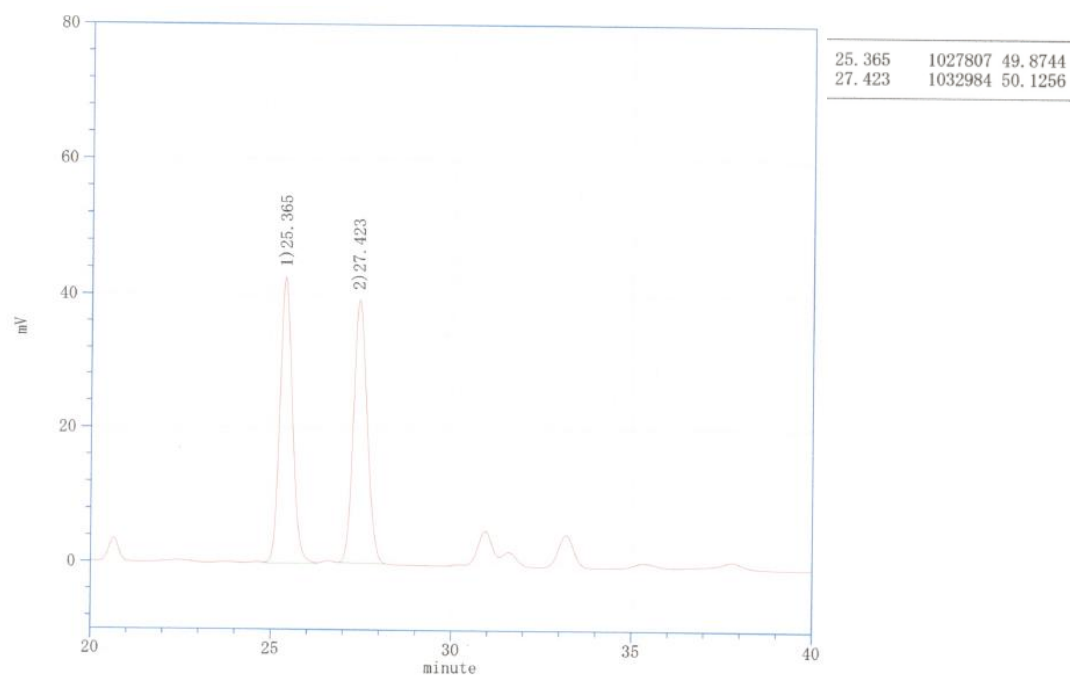

**3n:** Daicel Chiralpak IG-3, hexane/2-propanol = 5:1, flow rate = 0.5 mL/min, 214 nm

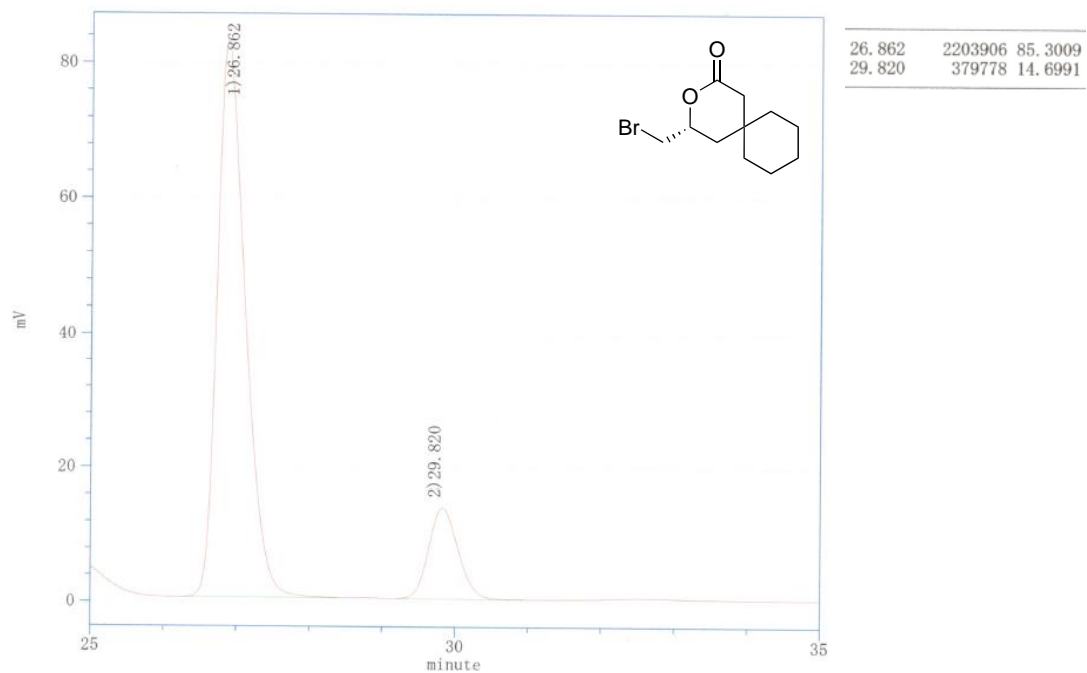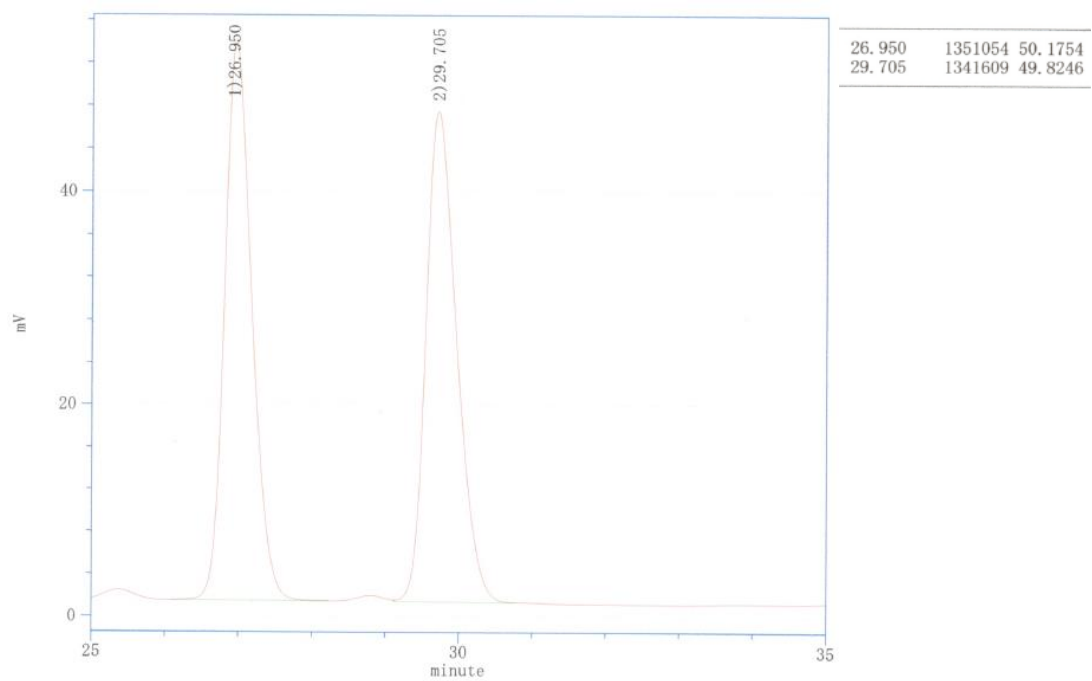

**3o:** Daicel Chiralpak AS-3, hexane/2-propanol = 1:1, flow rate = 0.5 mL/min, 254 nm

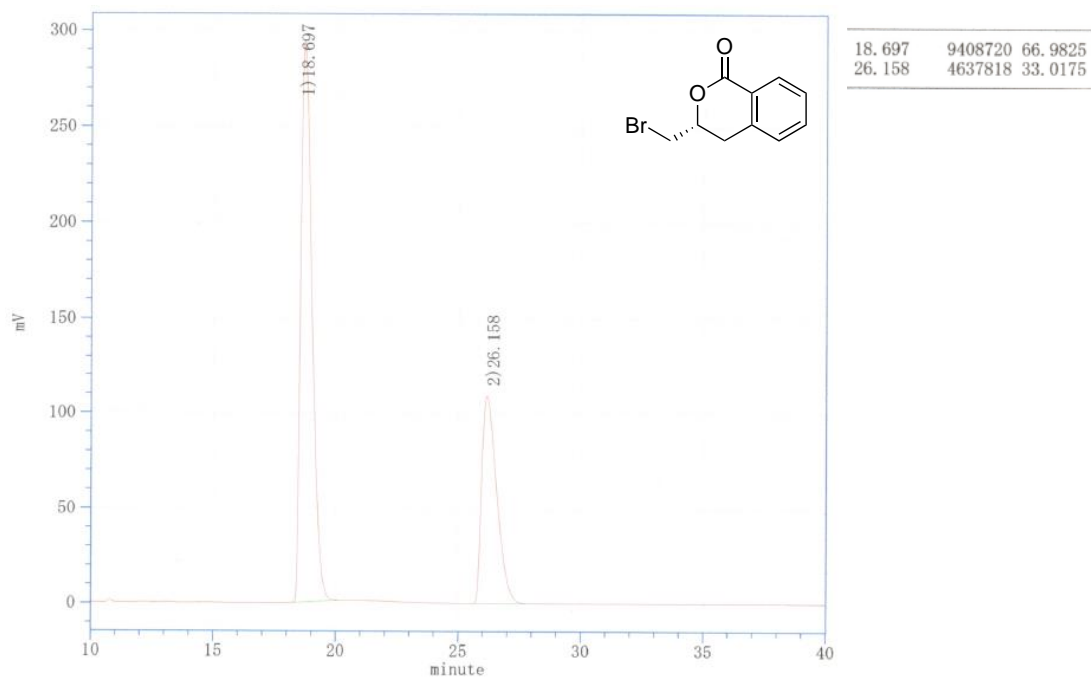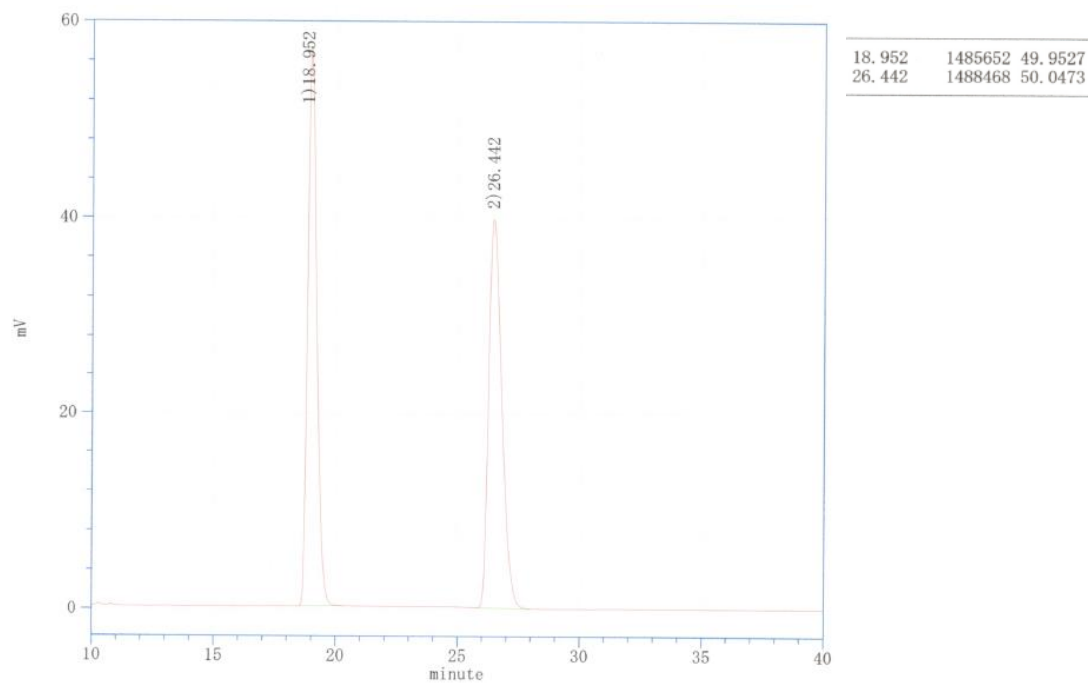



7: Daicel Chiralpak IE-3, hexane/2-propanol = 2:1, flow rate = 0.5 mL/min, 254 nm

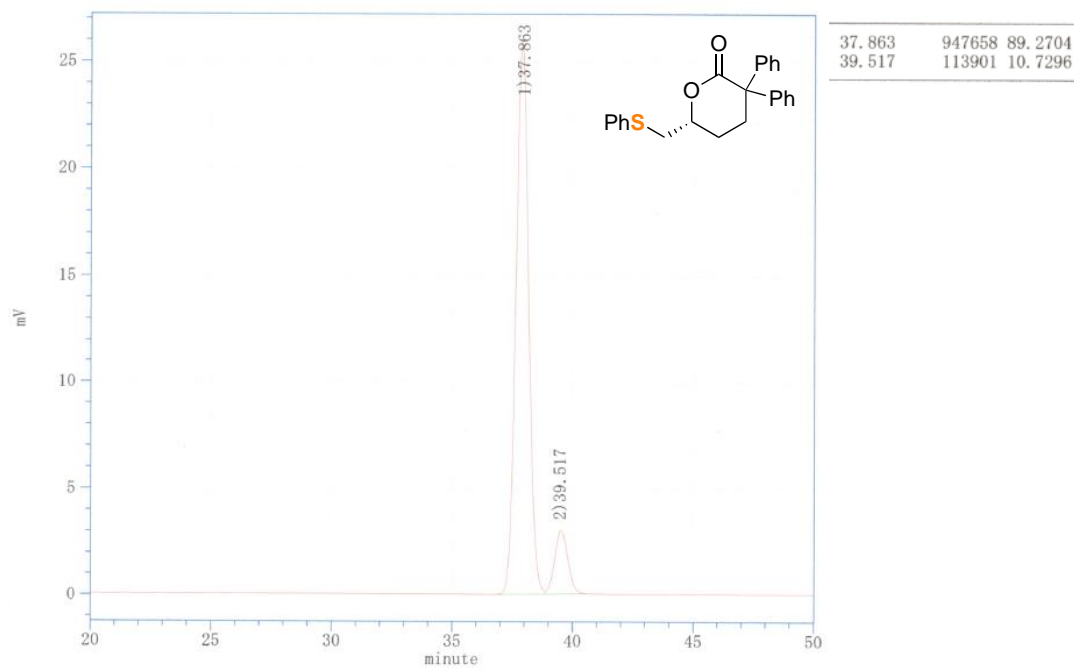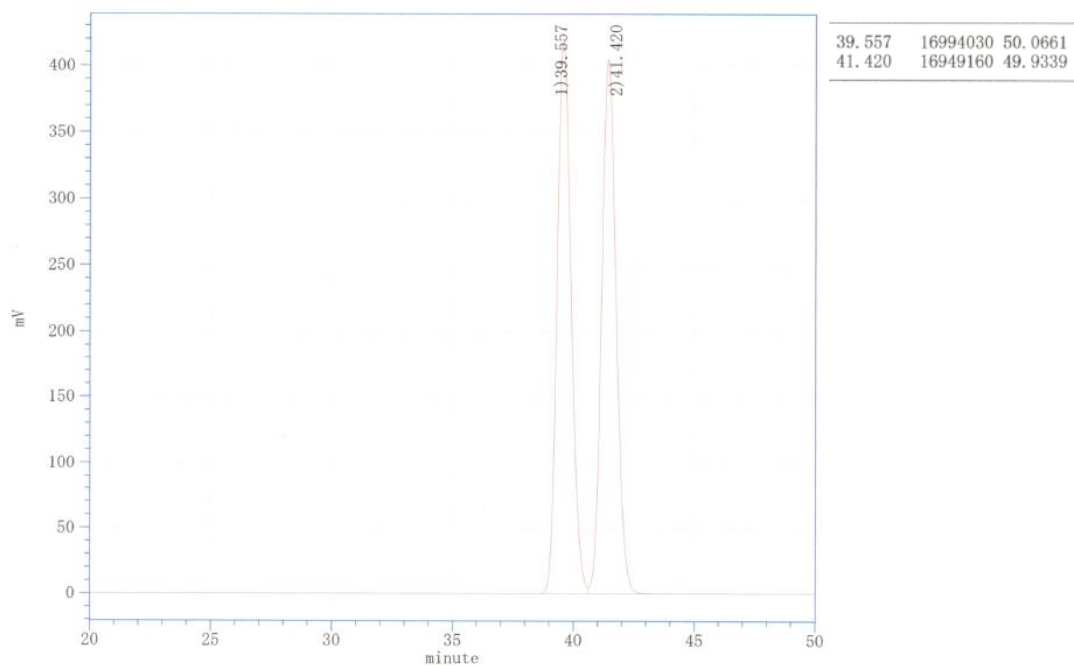

8: Daicel Chiralpak IE-3, hexane/2-propanol = 2:1, flow rate = 0.5 mL/min, 254 nm

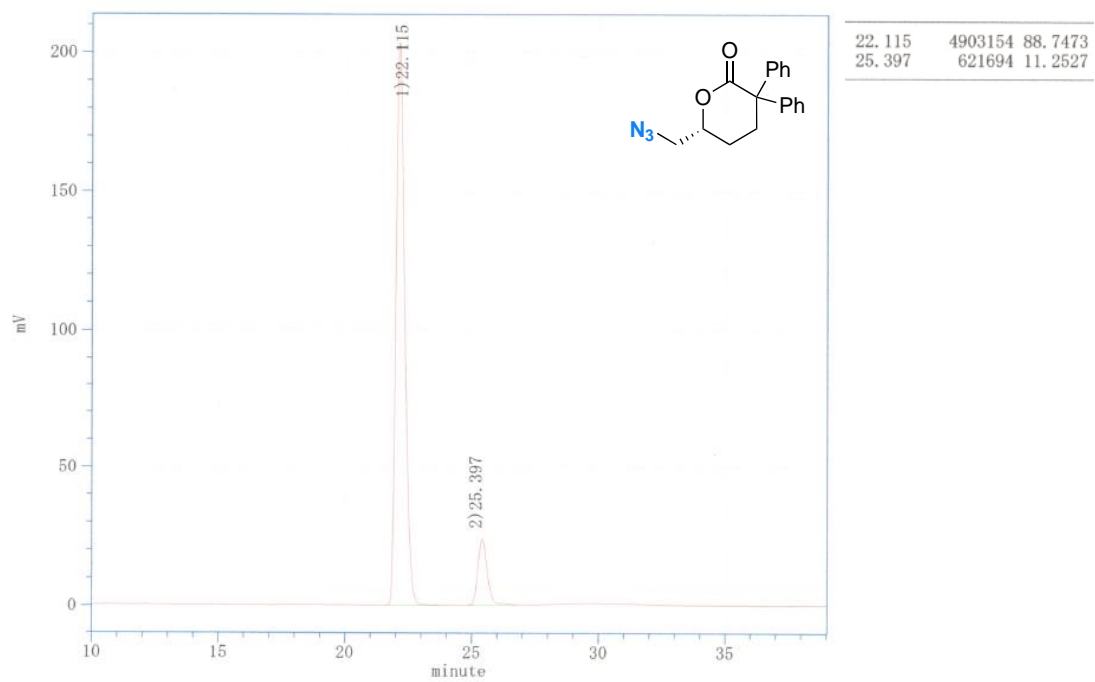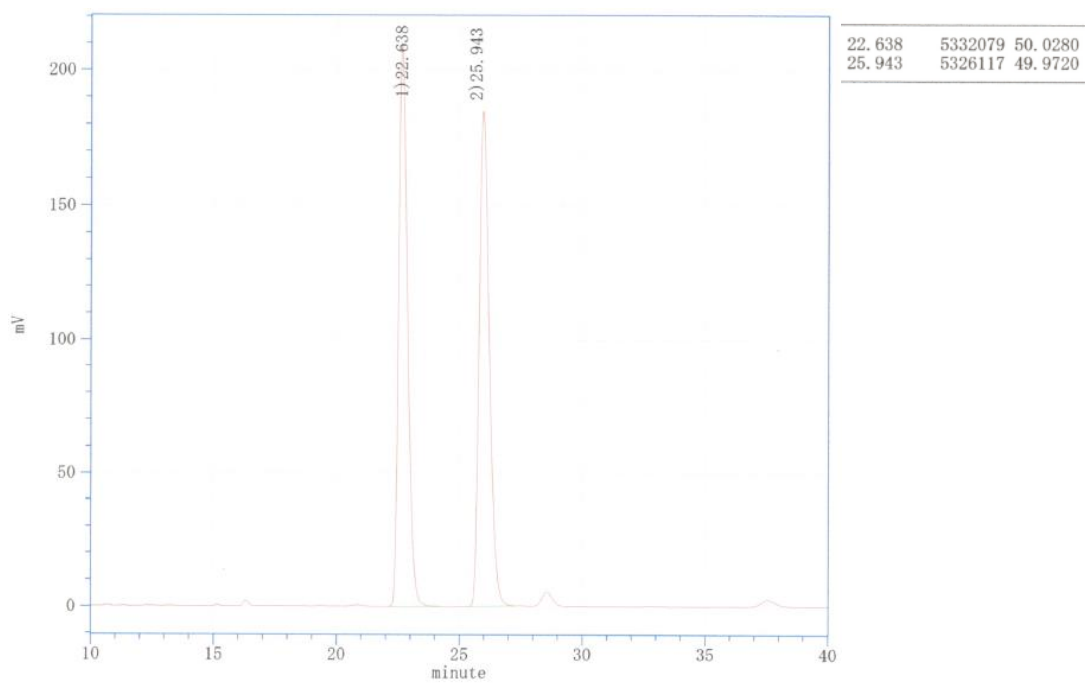

9: Daicel Chiralpak IB-3, hexane/2-propanol = 20:1, flow rate = 0.5 mL/min, 254 nm

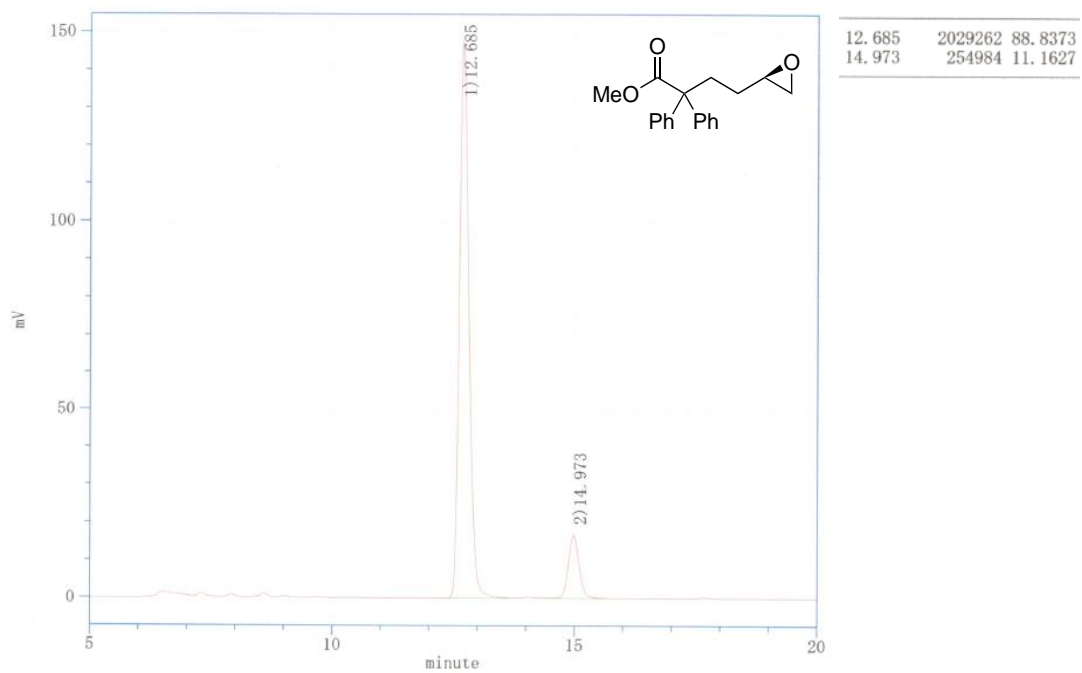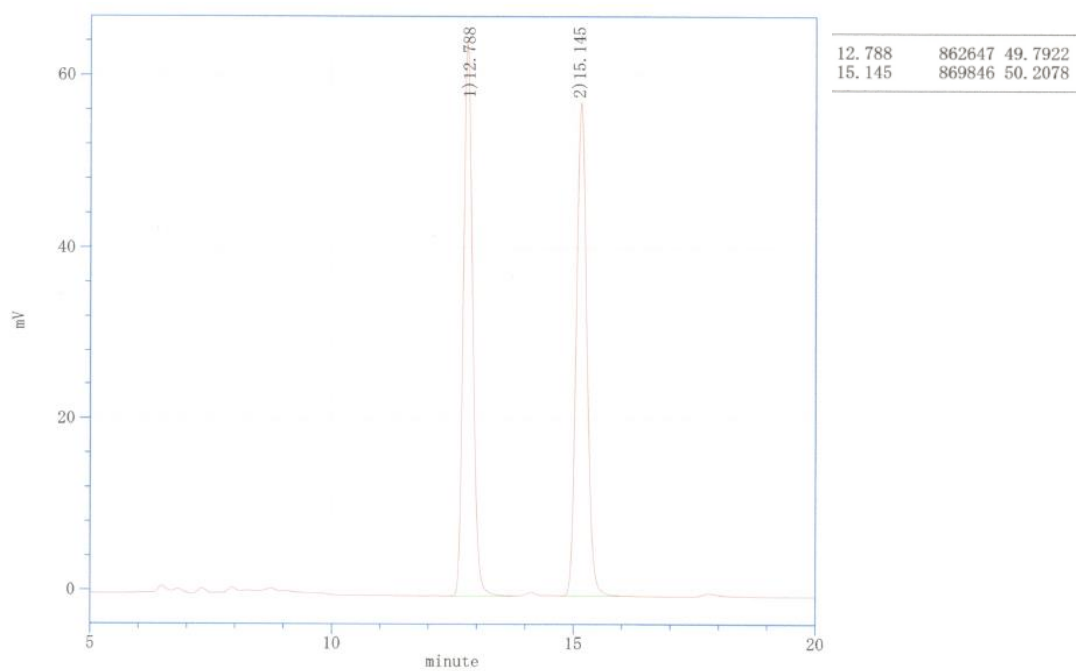

Supplement: Additional file 1 [file 1860-5397-20-158-S1.pdf]
